# Supplementary material
Source: PubMed Central journal article supplement (PMC6644467)

## Experimental Supporting Information

### Organic Dye Catalyzed, Visible-Light Photoredox Bromination of Arenes and Heteroarenes using N-Bromosuccinimide

David A. Rogers, Roxanne G. Brown, Zachary C. Brandeburg, Eric Y. Ko, Megan D. Hopkins, Gabriel LeBlanc and Angus A. Lamar\*

Department of Chemistry and Biochemistry, The University of Tulsa, 800 S. Tucker Dr., Tulsa, OK 74104, USA.

[angus-lamar@utulsa.edu](mailto:angus-lamar@utulsa.edu)

#### Index

|                                                     |     |
|-----------------------------------------------------|-----|
| General information - LED chamber                   | S-1 |
| Electrochemistry Information                        | S-2 |
| Characterization of Compounds <b>3</b> and <b>5</b> | S-3 |
| <sup>1</sup> H and <sup>13</sup> C NMR Spectra      | S-5 |

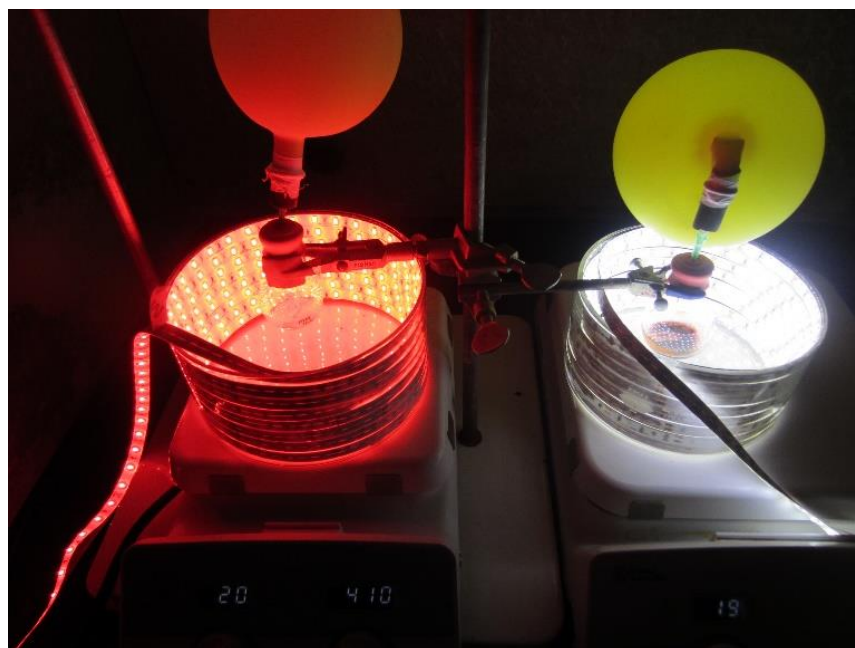

**Figure S1.** On the left – A red LED strip (620 nm) light bath reaction vessel

On the right – A white LED strip (cool white) light bath reaction vessel

Photocatalytic reactions were performed in a light bath which was constructed in our laboratory similar to our previous reports as follows.<sup>1-3</sup> Waterproof 5050 LED strips (12V with power adapter, 18 LEDs/foot, approximately 0.24 Watt per LED – 72 Watt per strip) are coiled around the interior of evaporating dish (170mm x 90mm) using the adhesive backing of the LED strip. A Petri dish (150 x 20 mm) is placed upside down at the bottom of the dish to serve as an elevated glass “floor” to ensure that a round-bottom flask receives maximum light exposure. The temperature inside the dish is monitored and is generally maintained (air-cooled) between 19-22 °C (the temperature has not been observed above 25 °C).

## Methods for electrochemical experiments

Electrochemical experiments were performed using a BioLogic SP-200 Potentiostat using a platinum disk working electrode, a platinum mesh counter electrode, and a silver wire as the quasi-reference electrode. The electrolyte consisted of 0.25 mM erythrosine B and 100 mM tetrabutylammonium hexafluorophosphate in acetonitrile. In some experiments, 1 mM ferrocene was used as an internal standard, as well as for calibration of the quasi-reference electrode. The ferrocene formal potential was found to be 0.477 V vs the silver wire quasi-reference electrode. Cyclic voltammetry was performed using a scan rate of 500 mV/s.

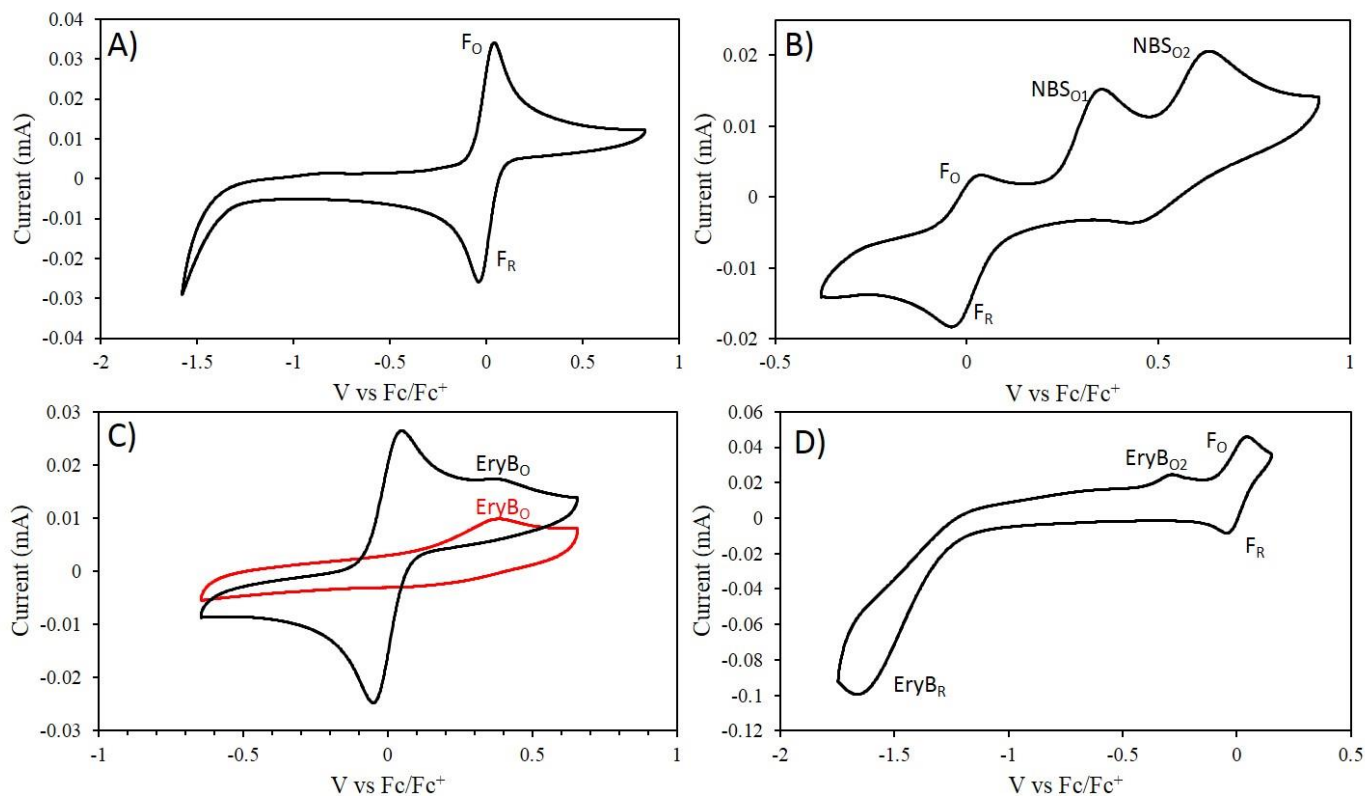

**Figure S2.** Cyclic voltammograms of (A) ferrocene, (B) NBS with ferrocene, (C) Ery B with (black) and without (red) ferrocene, and (D) Ery B with ferrocene using a platinum disk working electrode. Major redox peaks have been labeled as oxidation (o) or reduction (r) along with an abbreviation for the chemical entity. Formal potentials for irreversible electrochemical behavior were estimated using the half-wave potential. Note that the oxidation peak observed in (D), labeled EryB<sub>O2</sub>, only appears after a reducing potential (below -1V vs Fc/Fc<sup>+</sup>) has been reached and is therefore not an oxidation of the ground state Ery B.

### 1-Bromonaphthalene (3)

The title compound was quantified using gas chromatography with adamantane as an internal standard. A standard curve of 1-bromonaphthalene (Figure S3) was prepared in 5 separate reaction vessels by adding varying amounts of 1-bromonaphthalene (between 0 and 0.25 mmol) to 3 mL of acetonitrile. To each of the 3 mL acetonitrile solutions was added 8 mL of hexanes and 0.156 mmol (20 mg) of adamantane. The acetonitrile solution was extracted with the hexanes, and 1 mL of the hexanes portion was removed for gas chromatography injection. Gas chromatography was performed using a Shimadzu GC-2010 Plus with GCMS-QP2010 with a Restek Rtx-5MS capillary column (30m; 0.25 mmID; 0.25  $\mu$ m df; Crossbond – 5% diphenyl/95% dimethyl polysiloxane). The GC method was as follows: 40 °C for 5 minutes, then increase at 10 °C/minute for 16 minutes (up to 200 °C). 200 °C is maintained for 10 additional minutes. As seen in Figure S4, 1-Bromonaphthalene is observed at 16.8 minutes, and confirmed by MS (EI)  $m/z$  206 and 208 ( $M^+$  1:1 ratio; 50% rel. intensity) 127 (100% rel. intensity) 63 (90% rel. intensity).

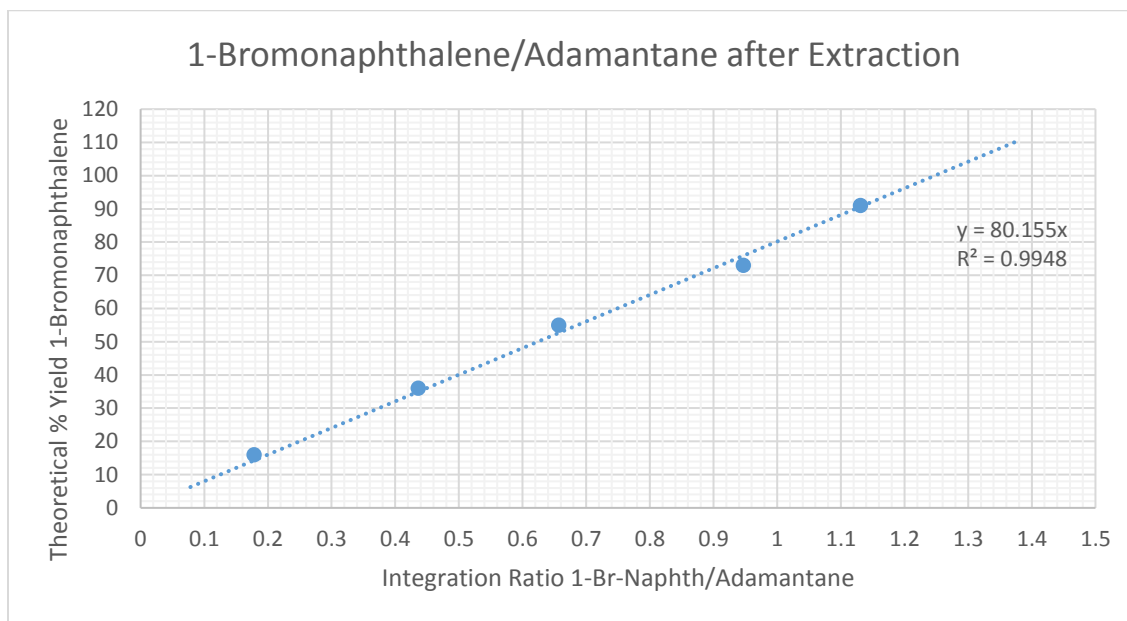

**Figure S3.** Standard curve of 1-bromonaphthalene versus internal standard (adamantane)

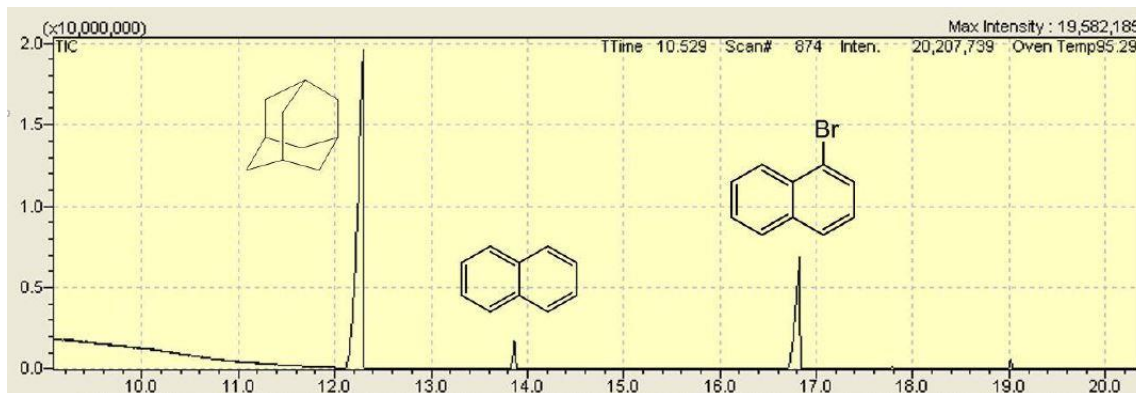

**Figure S4.** Expanded view of a typical GCMS chromatogram.

### *1-Bromo-4-methoxybenzene (5)*

The title compound was observed by  $^1\text{H}$  NMR and compared to a reported spectrum.<sup>4</sup> One equivalent of nitrobenzene was added as internal standard at the conclusion of the reaction time period. The  $^1\text{H}$  NMR spectrum is included within this supporting information document (Figure S10).

#### References:

1. Brueckner, A. C.; Hancock, E. N.; Anders, E. J.; Tierney, M. M.; Morgan, H. R.; Scott, K. A.; Lamar, A. A., Visible-light-mediated, nitrogen-centered radical amination of tertiary alkyl halides under metal-free conditions to form  $[\alpha]$ -tertiary amines. *Organic & biomolecular chemistry* **2016**, *14* (19), 4387-4392.
2. Hopkins, M. D.; Scott, K. A.; DeMier, B. C.; Morgan, H. R.; Macgruder, J. A.; Lamar, A. A., Formation of N-sulfonyl imines from iminoiodinanes by iodine-promoted, N-centered radical sulfonamidation of aldehydes. *Organic & biomolecular chemistry* **2017**, *15* (43), 9209-9216.
3. Hopkins, M.; Brandeburg, Z.; Hanson, A.; Lamar, A., Visible-Light, Iodine-Promoted Formation of N-Sulfonyl Imines and N-Alkylsulfonamides from Aldehydes and Hypervalent Iodine Reagents. *Molecules* **2018**, *23* (8), 1838.
4. Braddock, D. C.; Cansell, G.; Hermitage, S. A., (Diacetoxyiodo)benzene-Lithium Bromide as a Convenient Electrophilic  $\text{Br}^+$  Source. *Synlett* **2004**, 461-464.

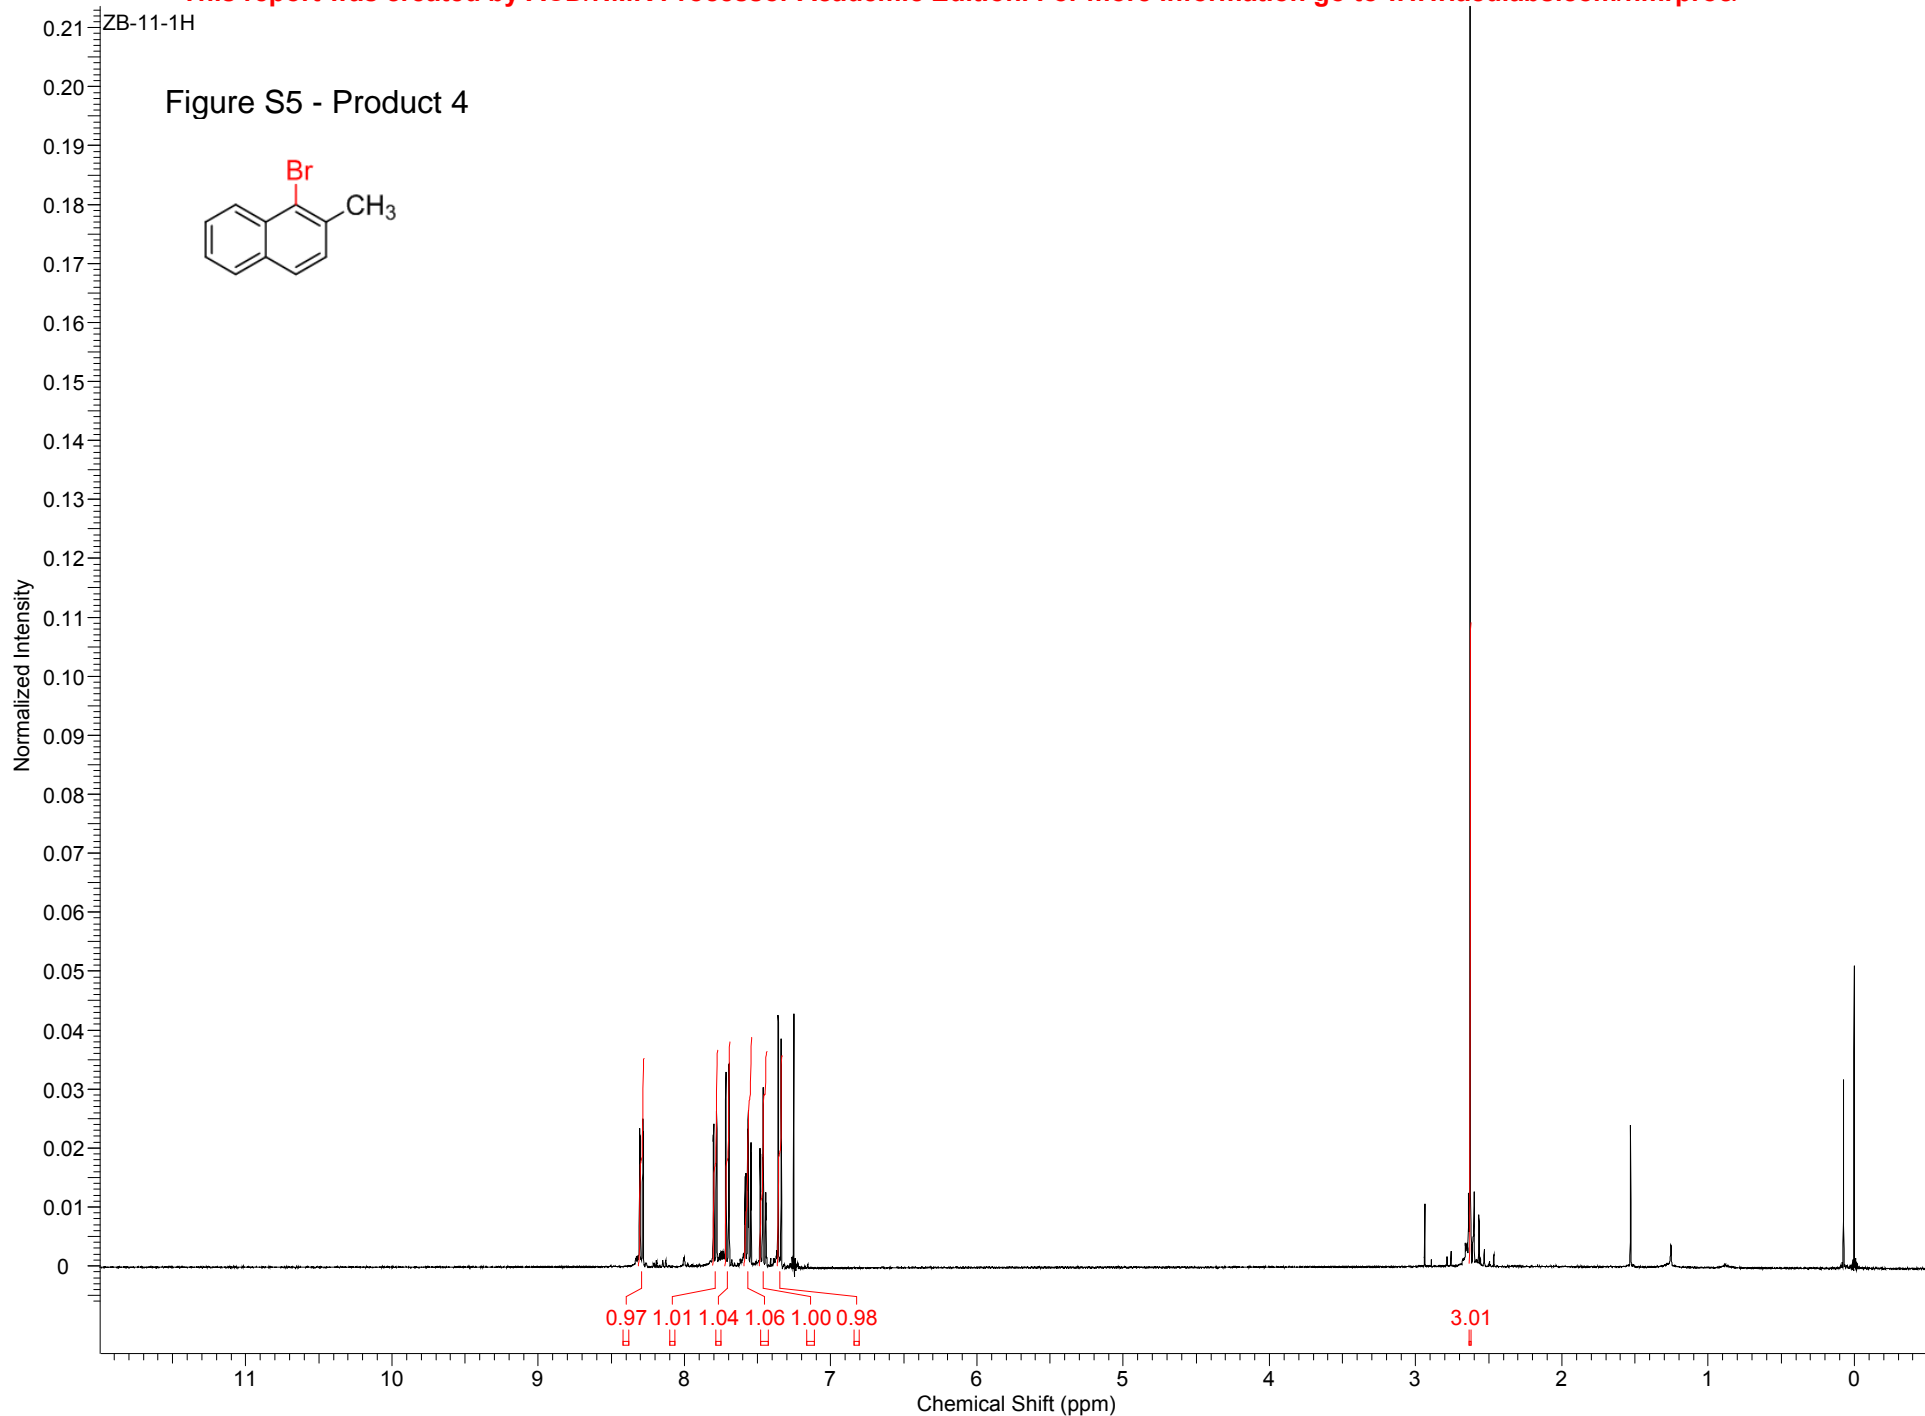

AL-2-127-B-10min

Figure S6 - 2-methylnaphthalene (uncatalyzed reaction - 10 min)

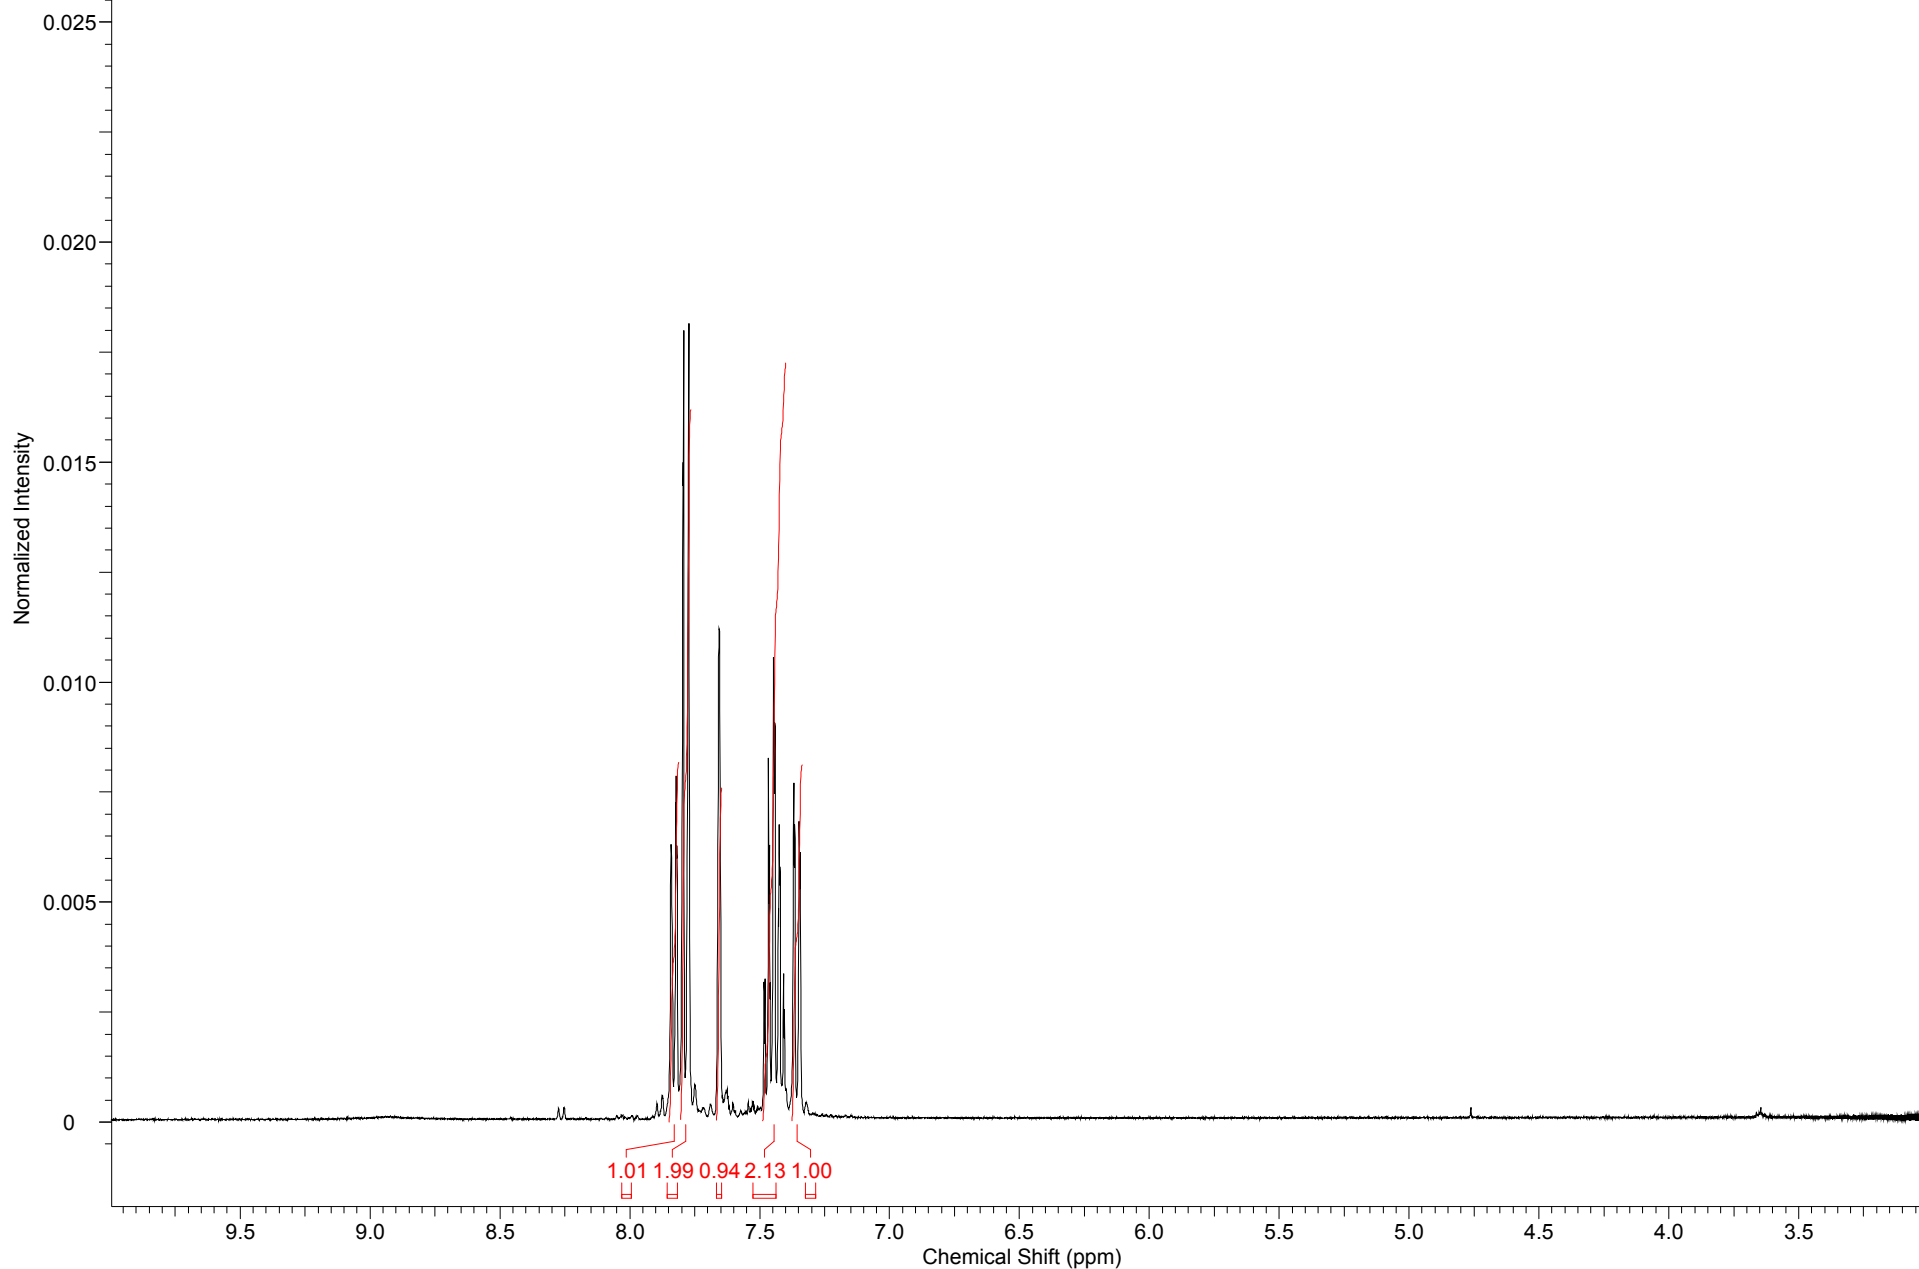

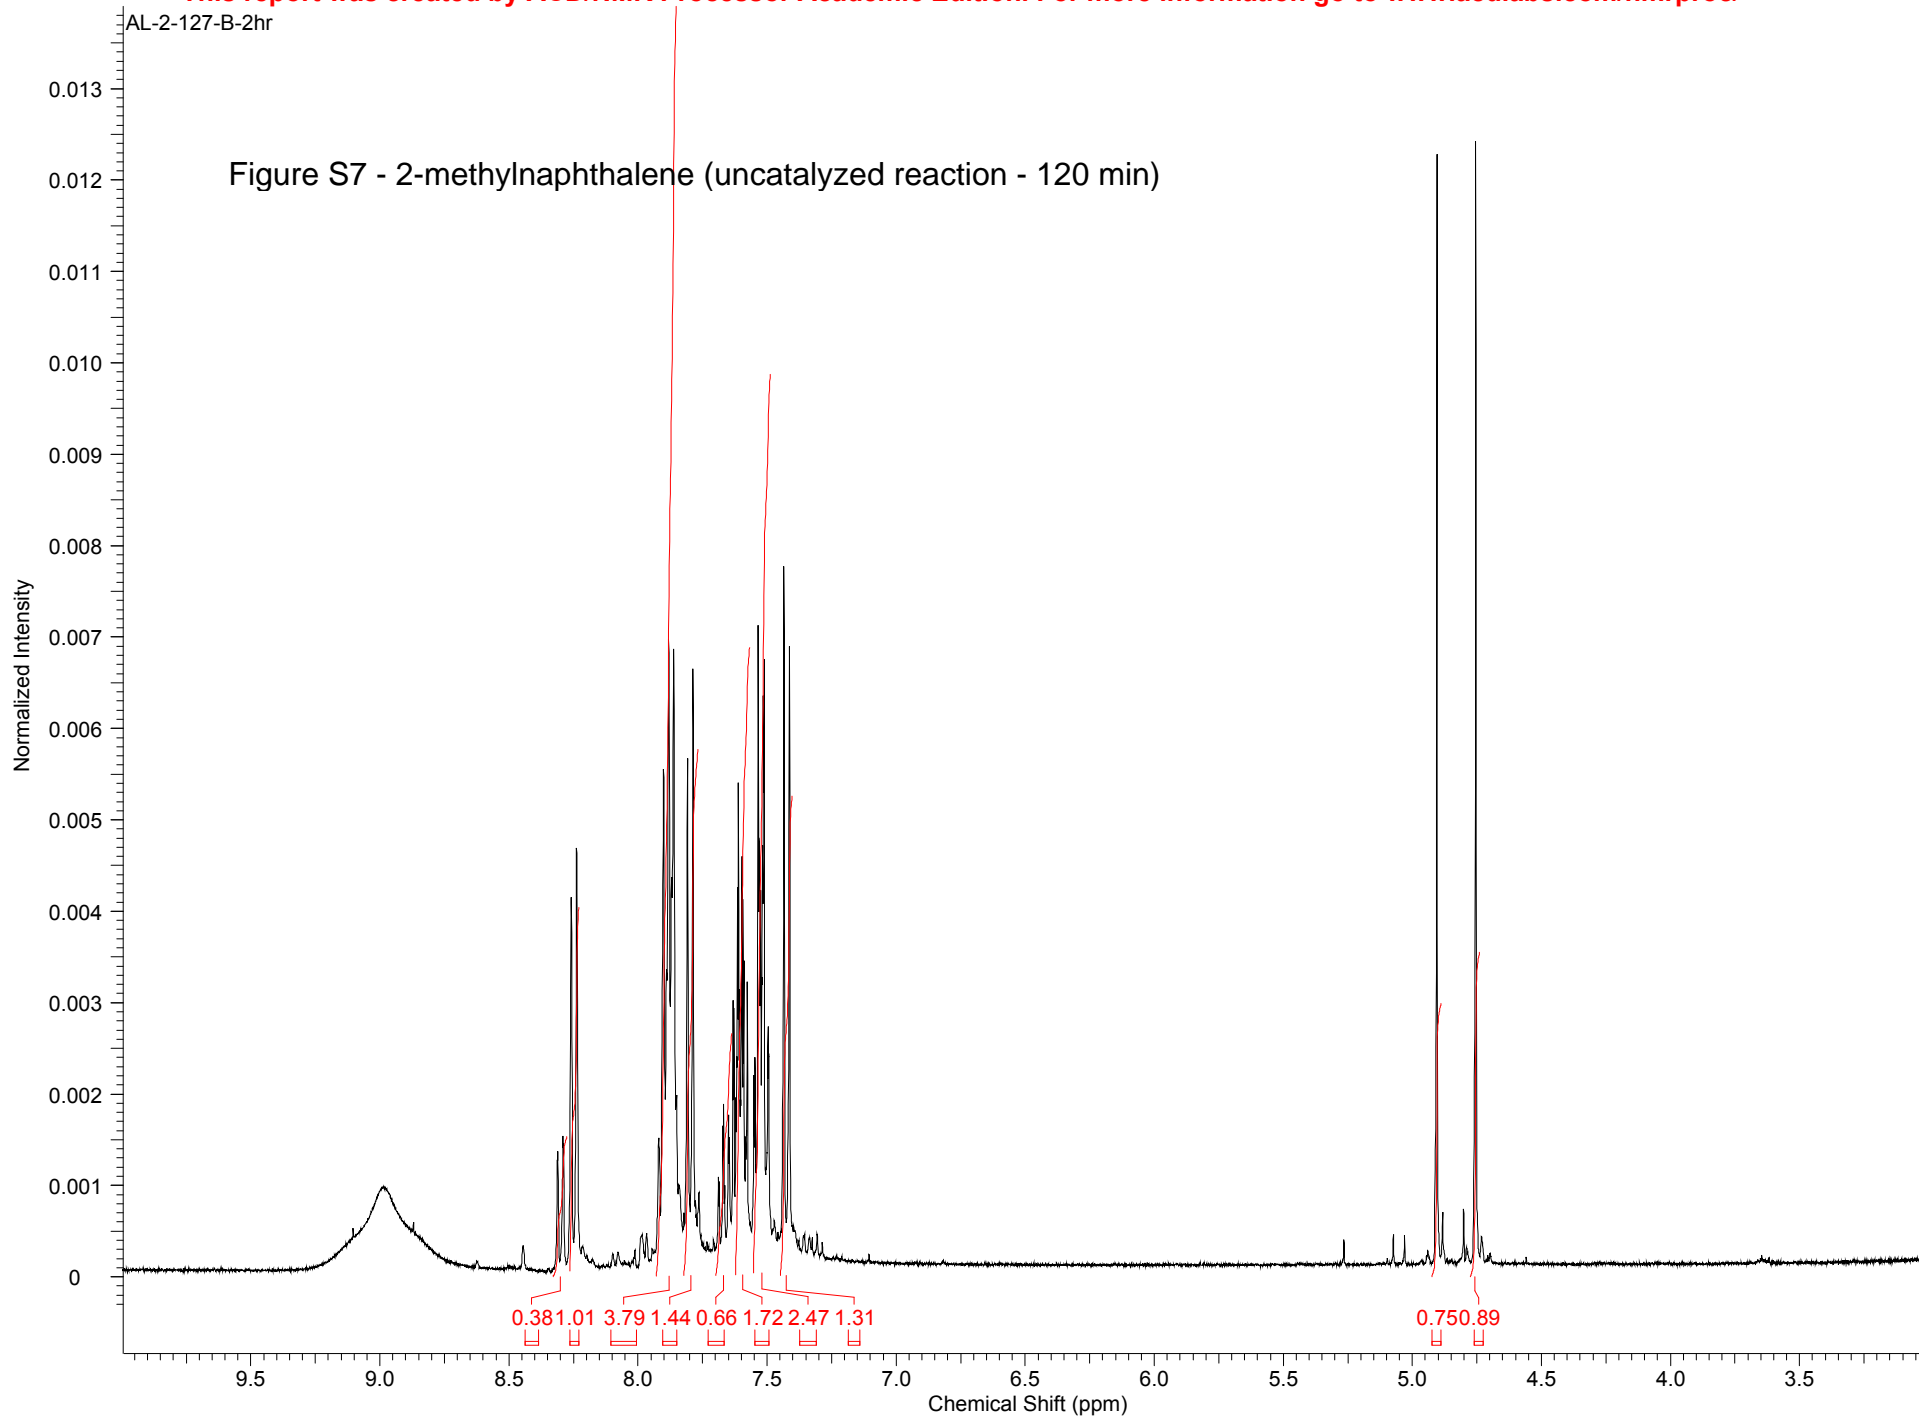

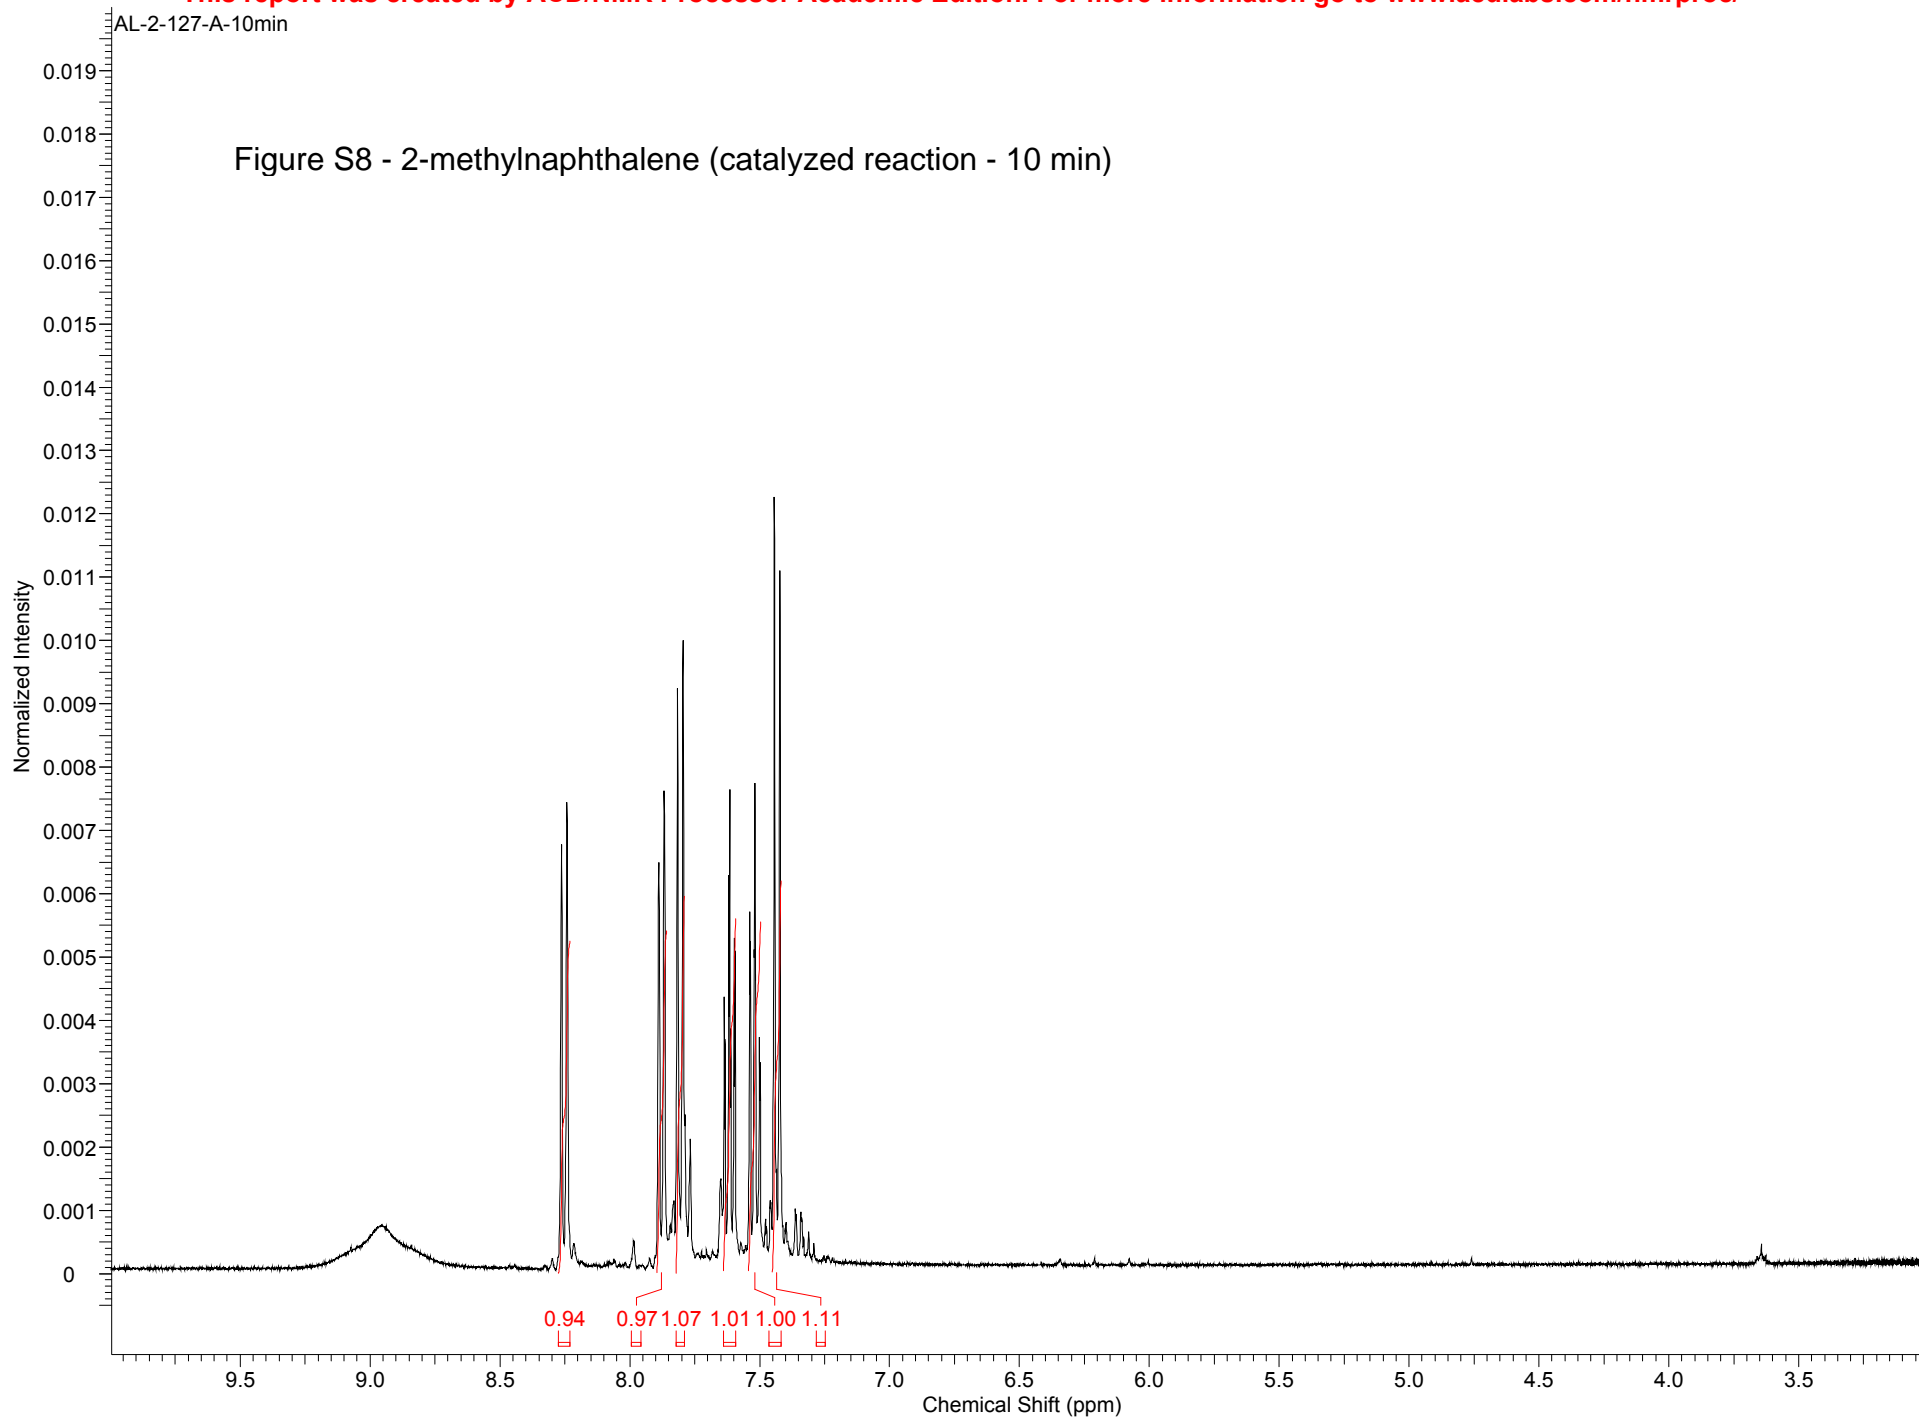



ZB-11-13C

Figure S9 - Product 4

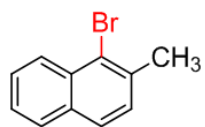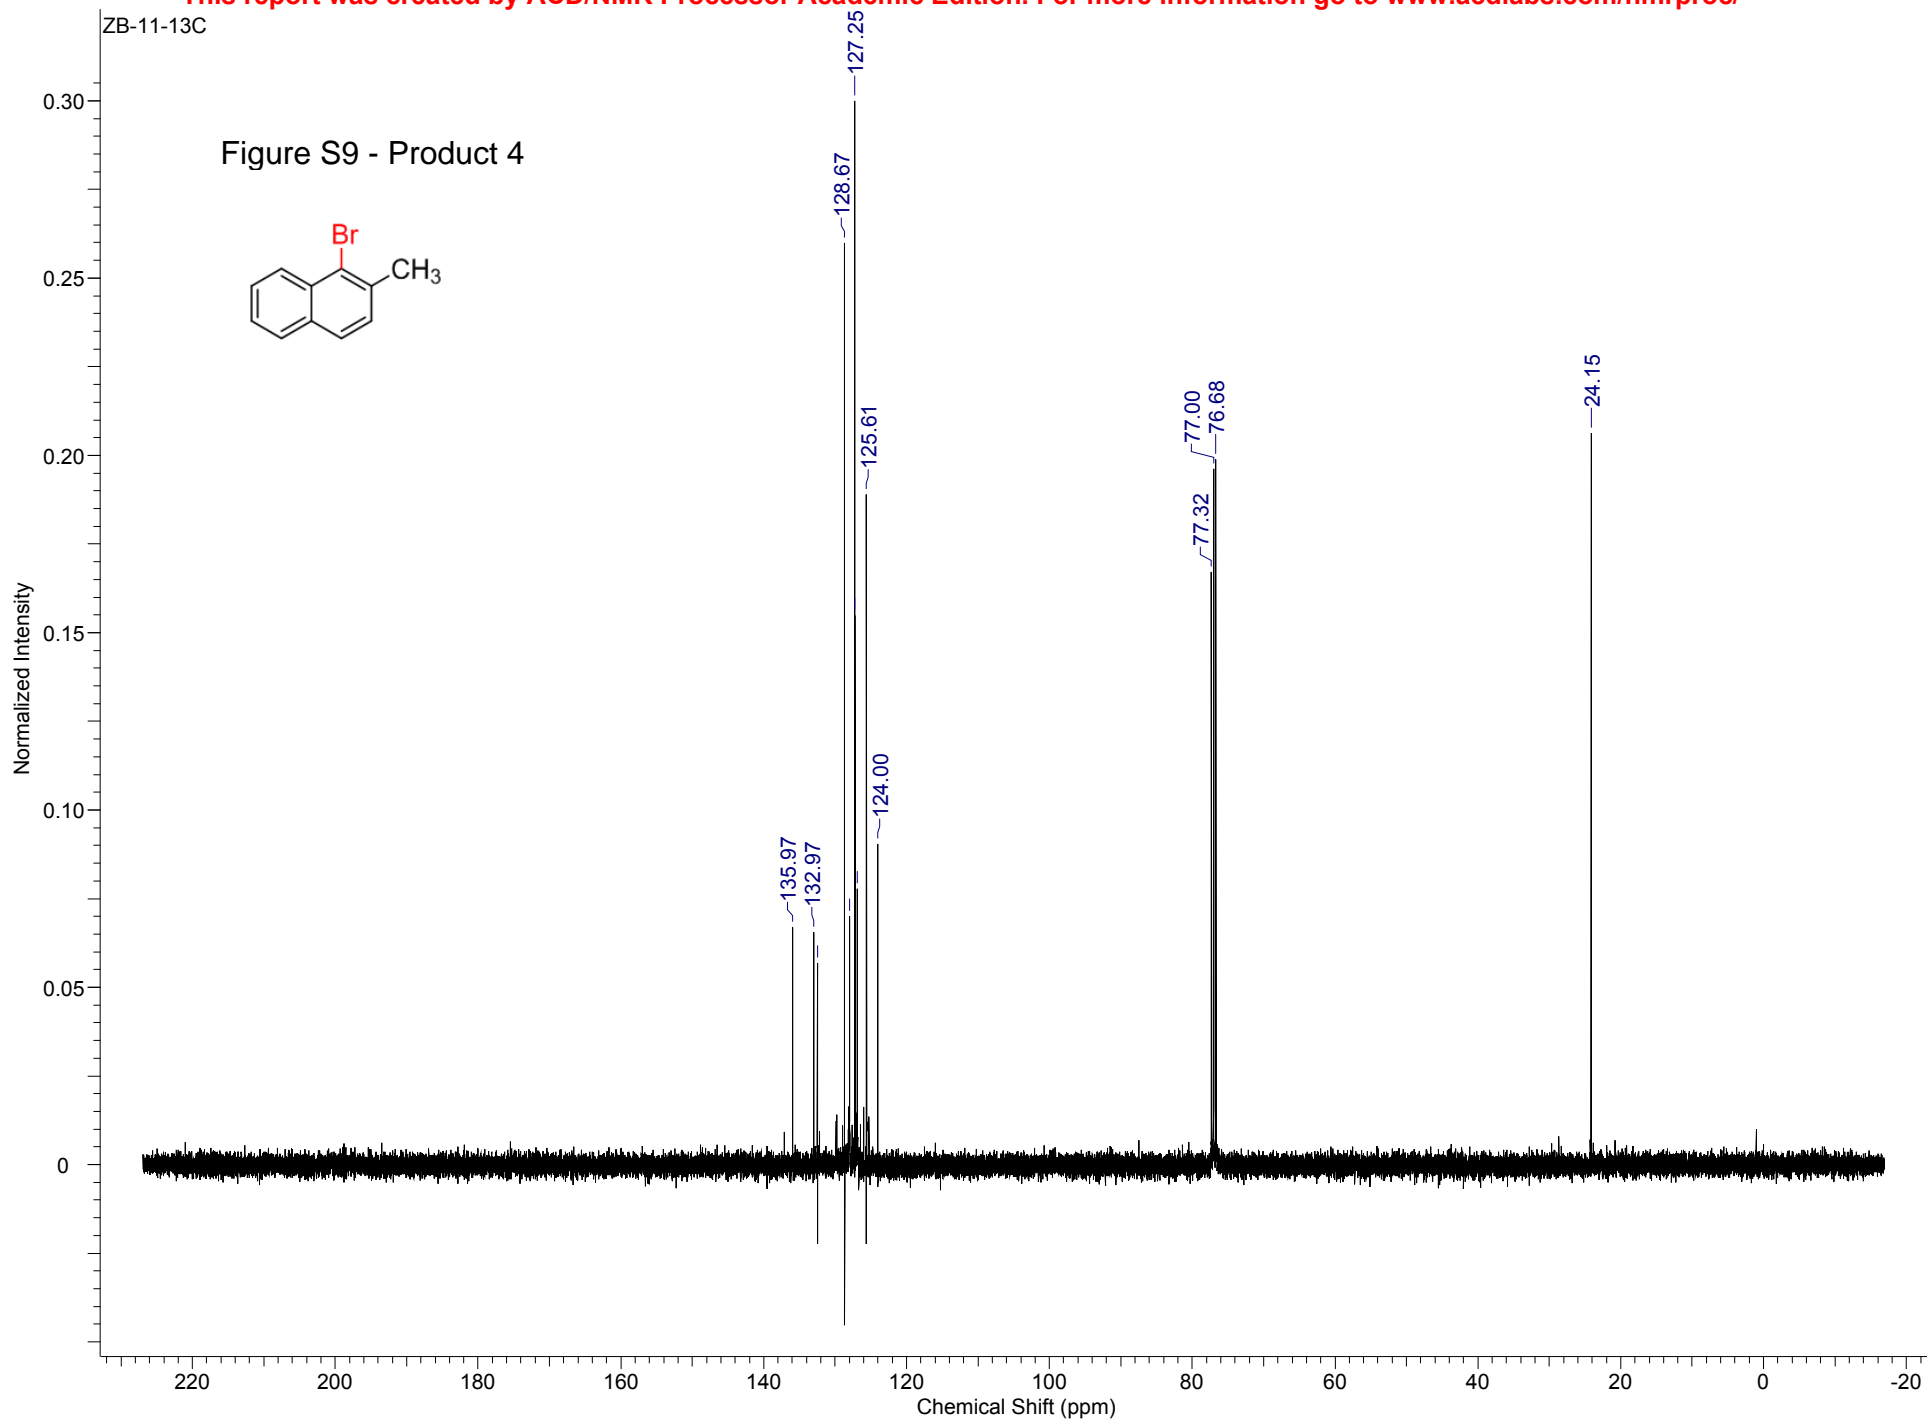

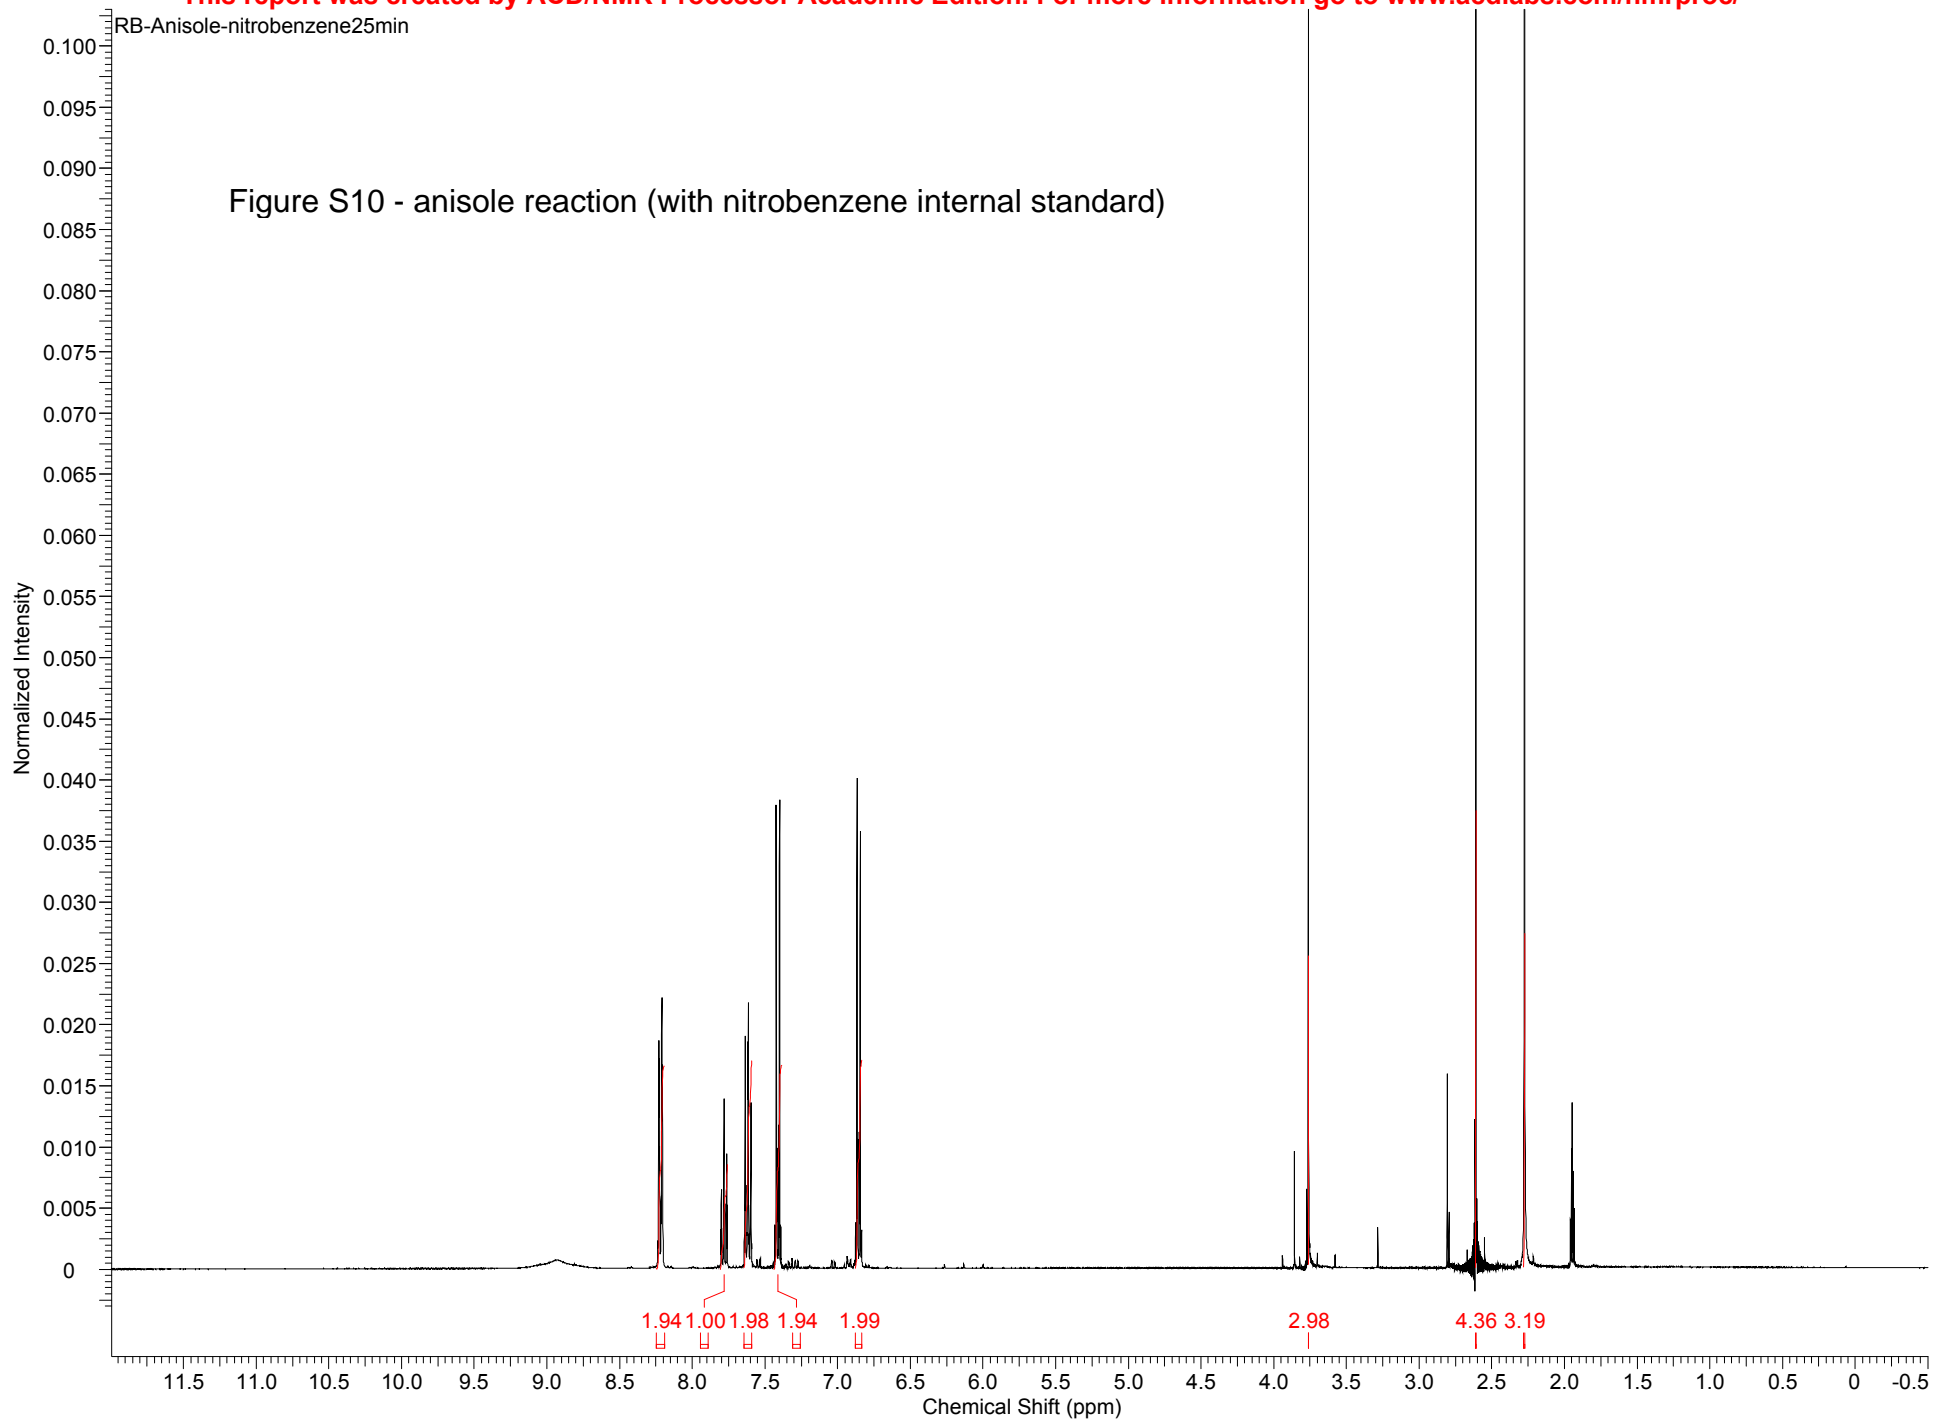

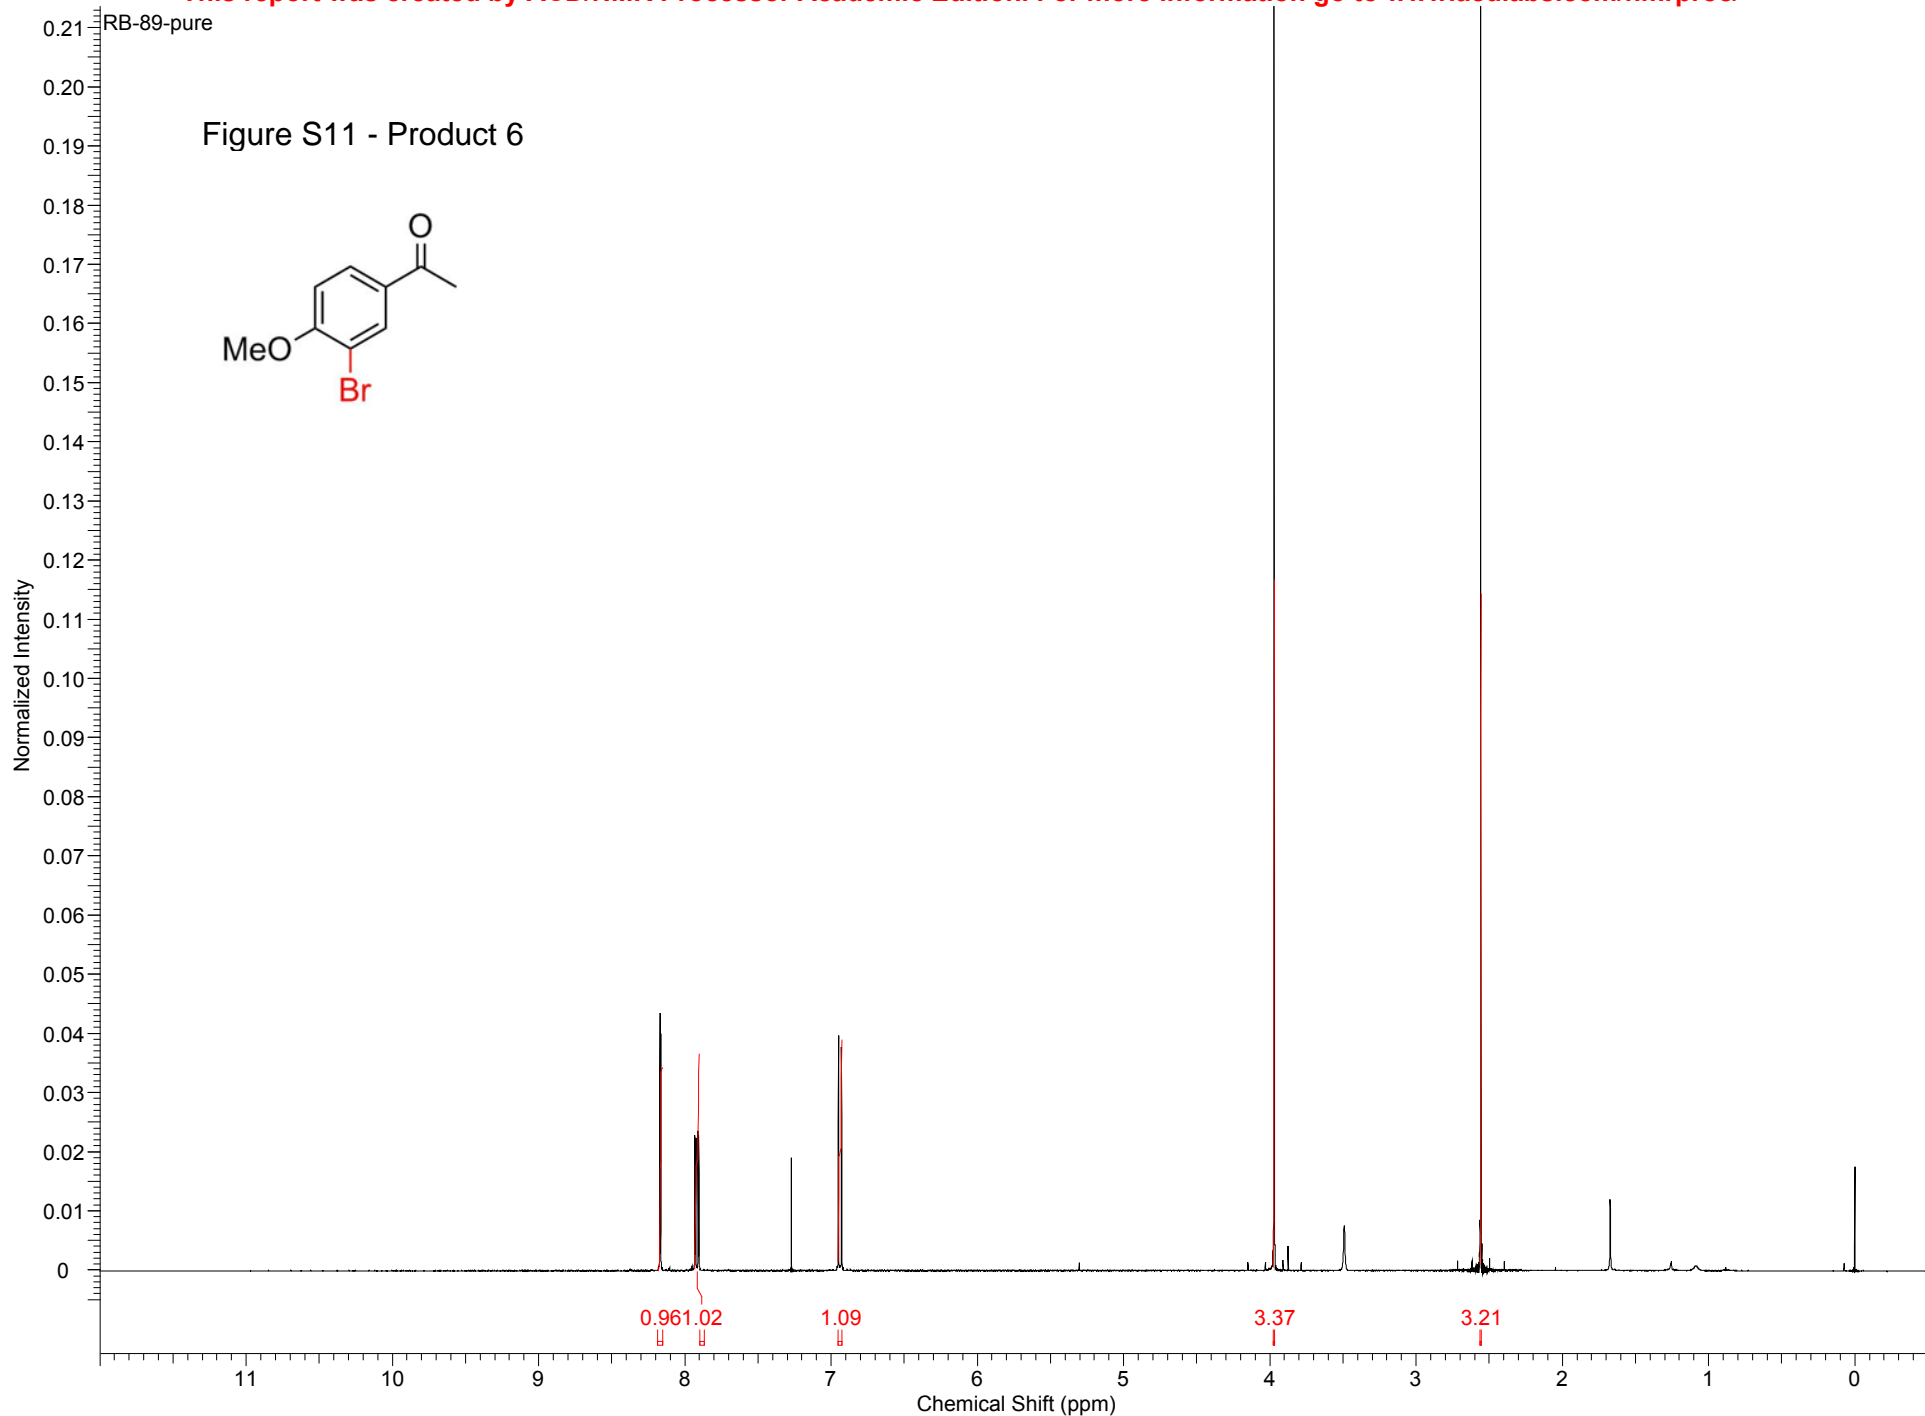

RB89-4000scans-13C

Figure S12 - Product 6

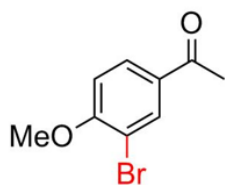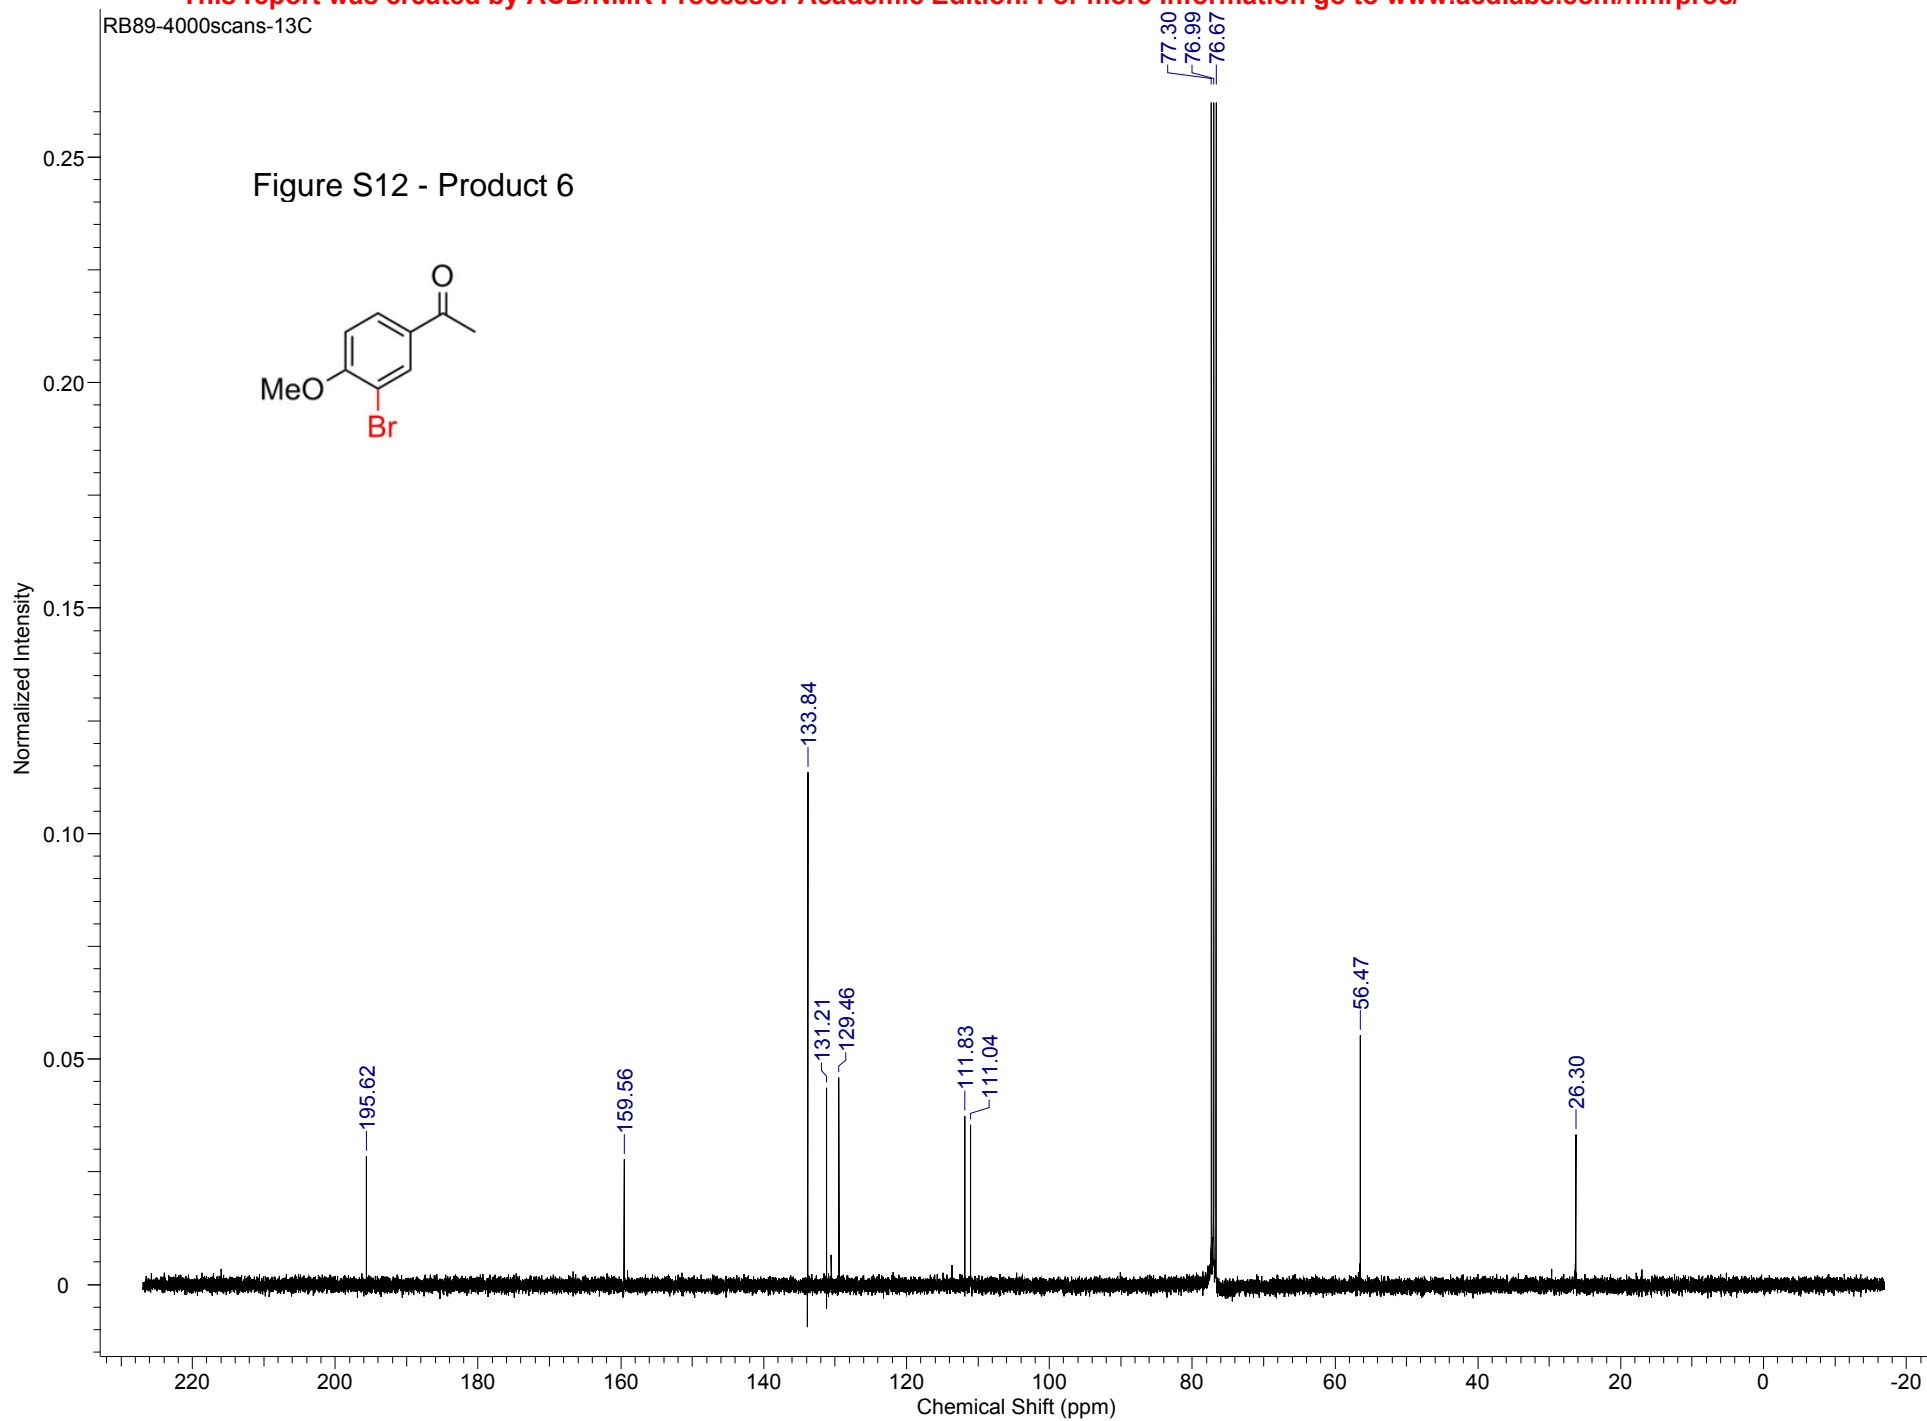

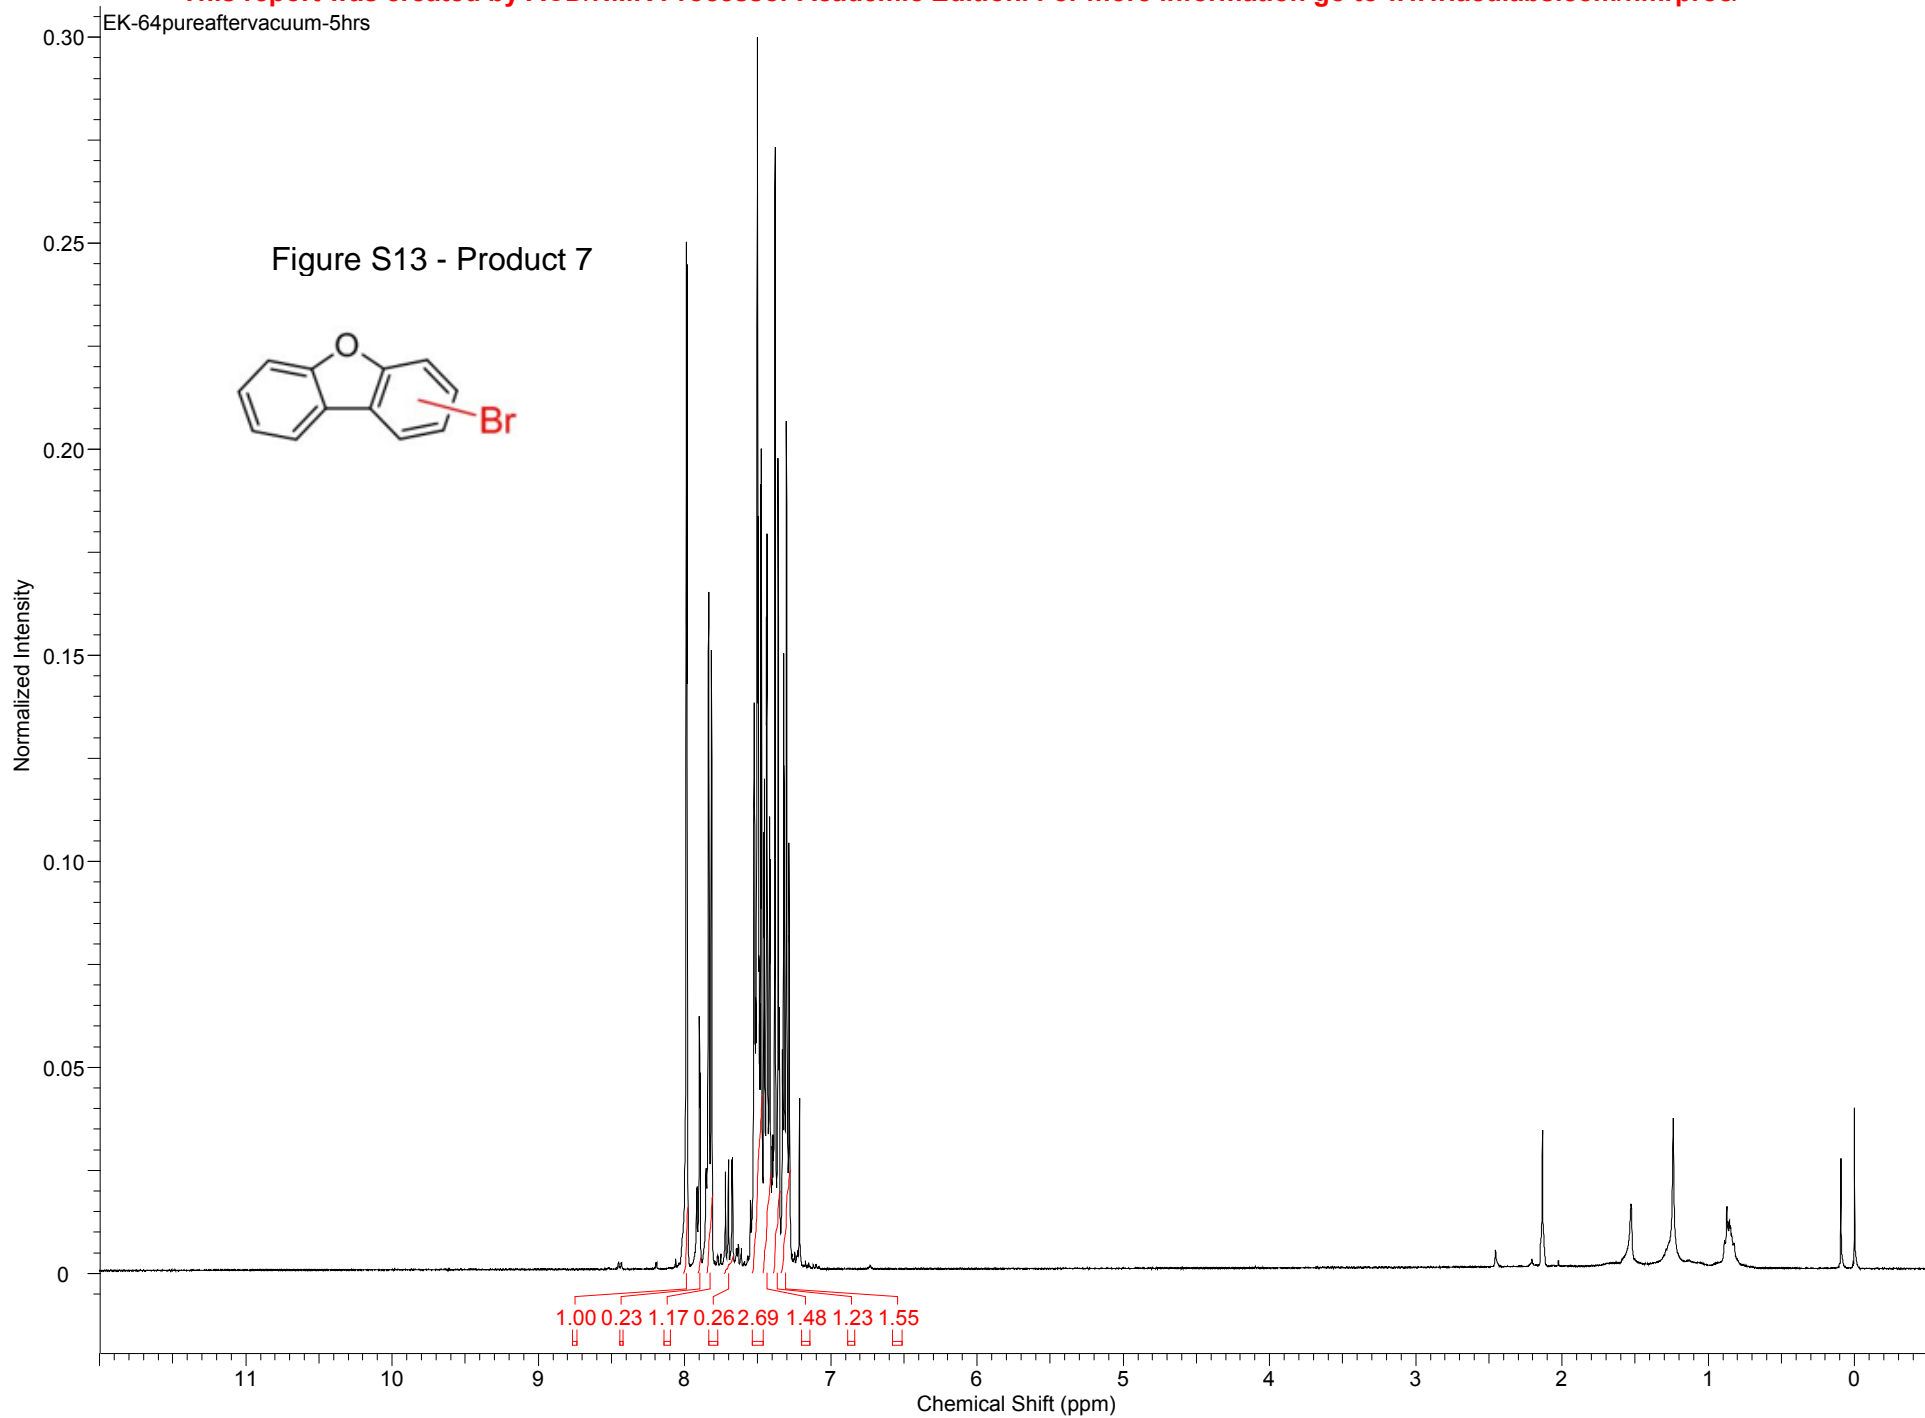

EK-64pureaftervacuum-5hrs

Figure S14 - Product 7 aromatic region

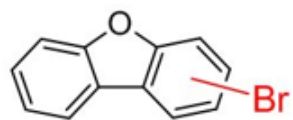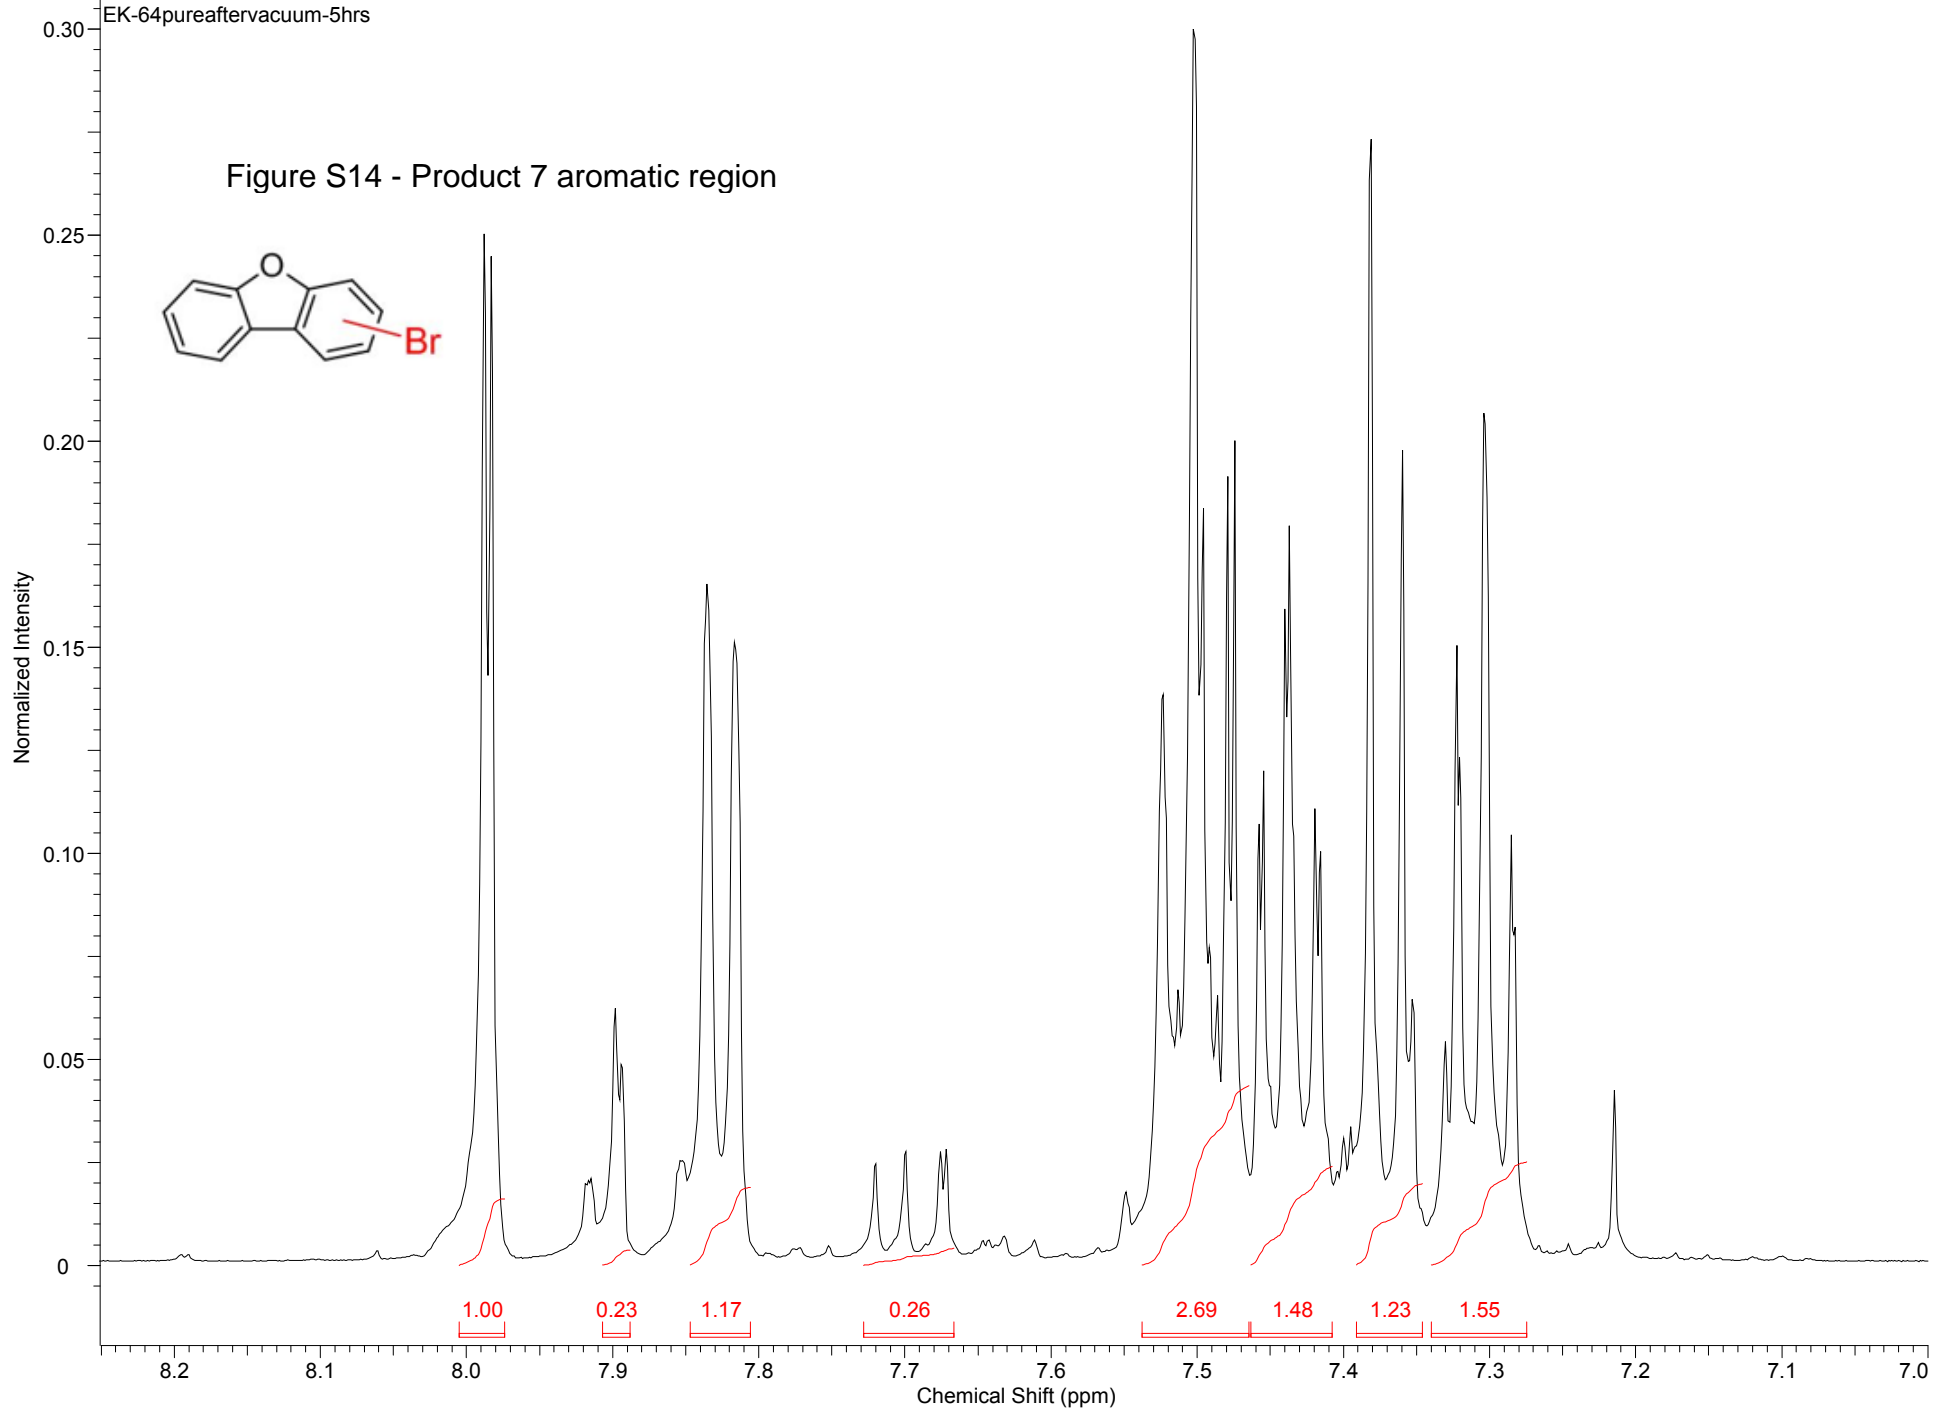

EK-64-13C-10000scans

Figure S15 - Product 7

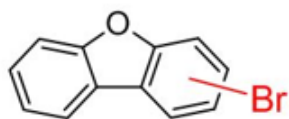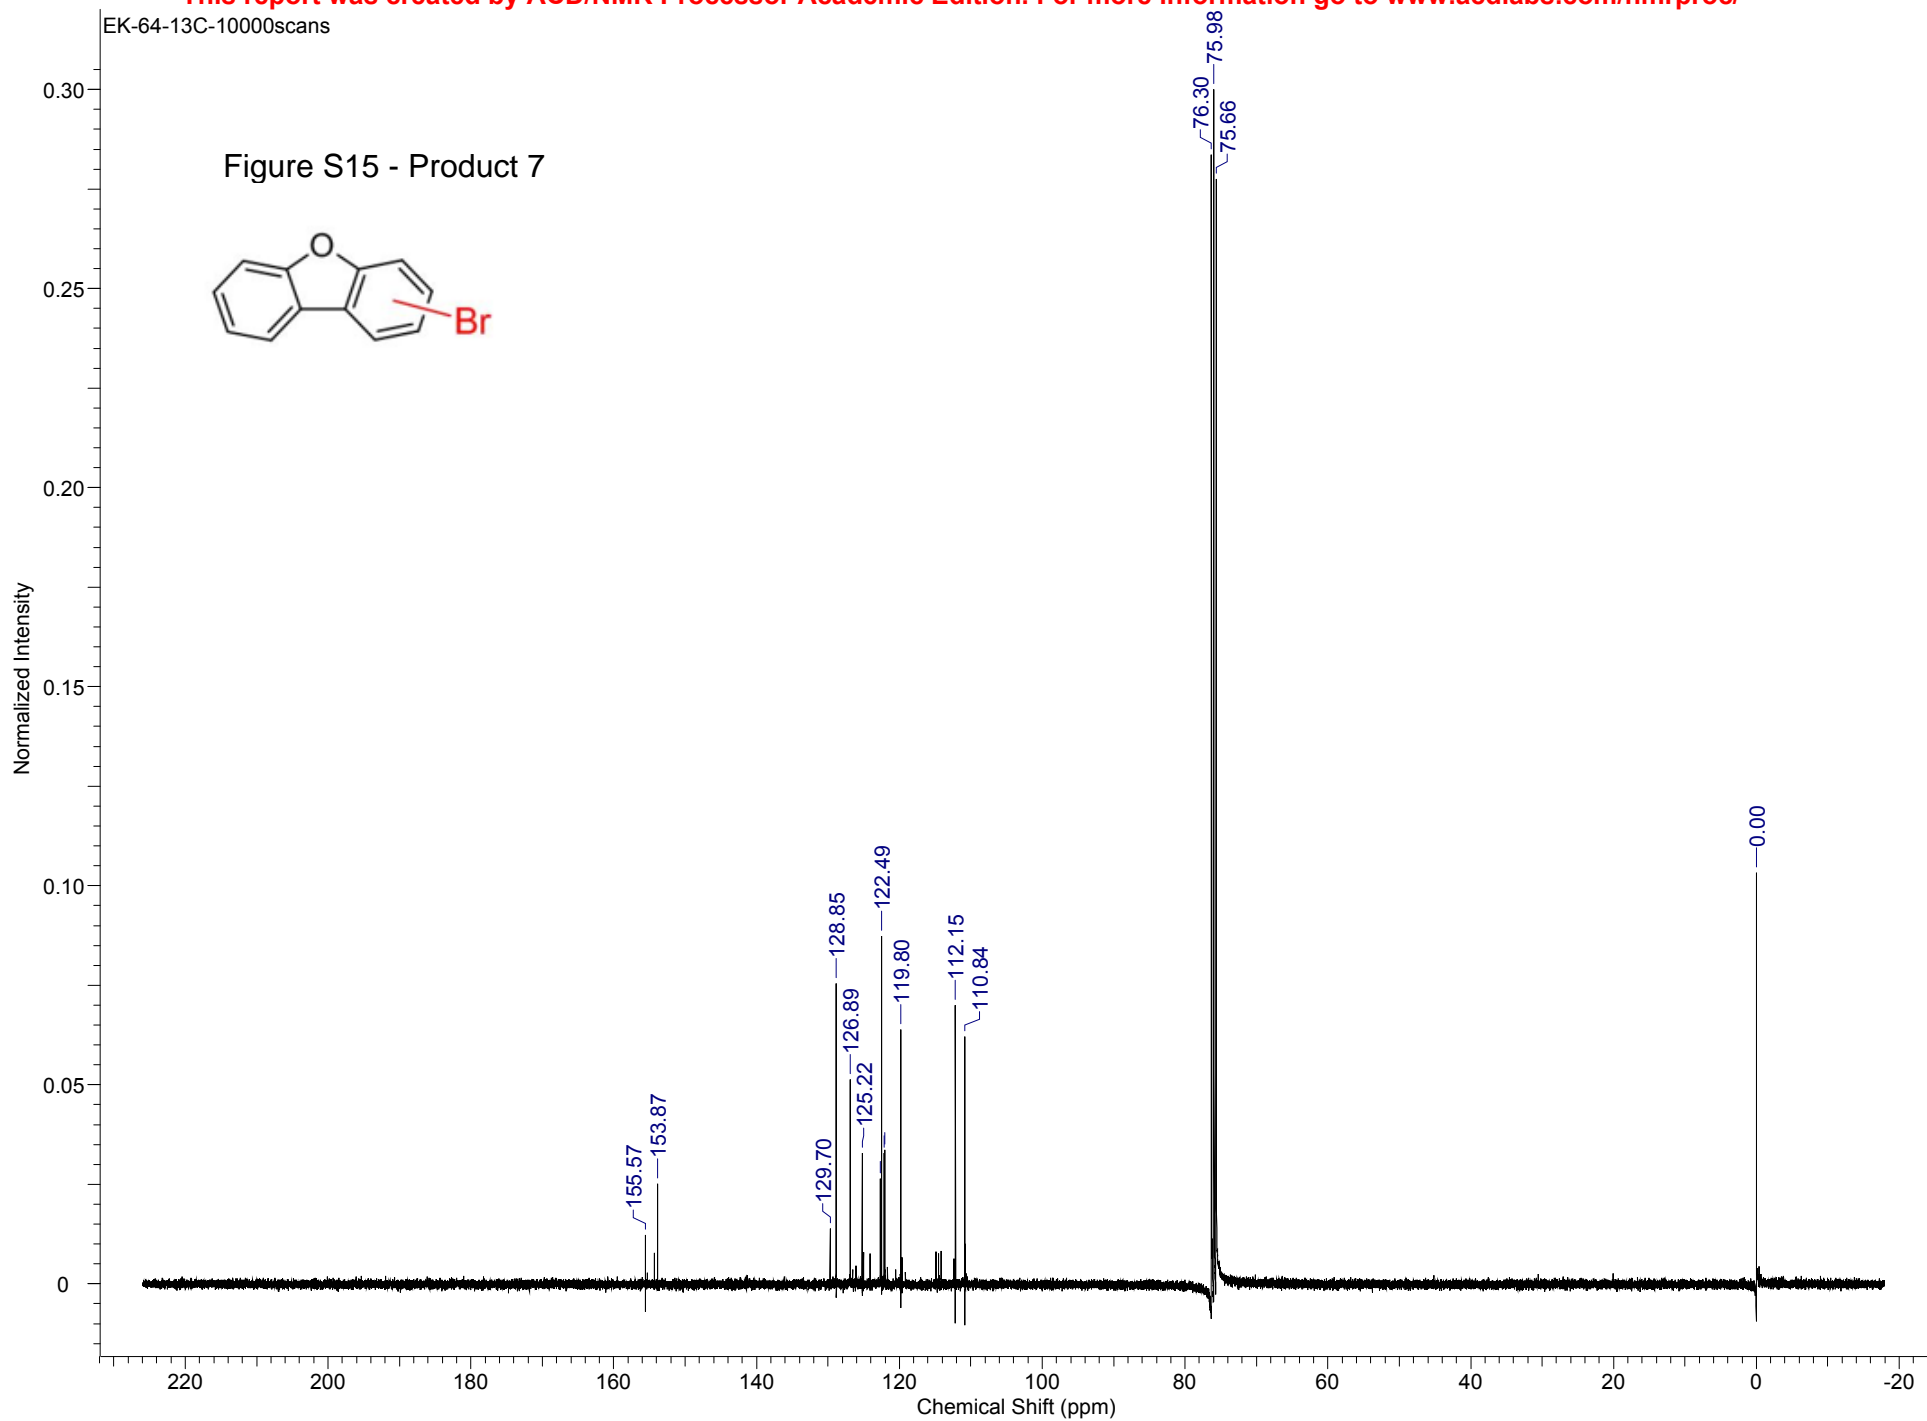

DR-6-41-f23-29-1H

Figure S16 - Product 8

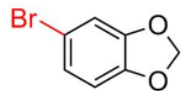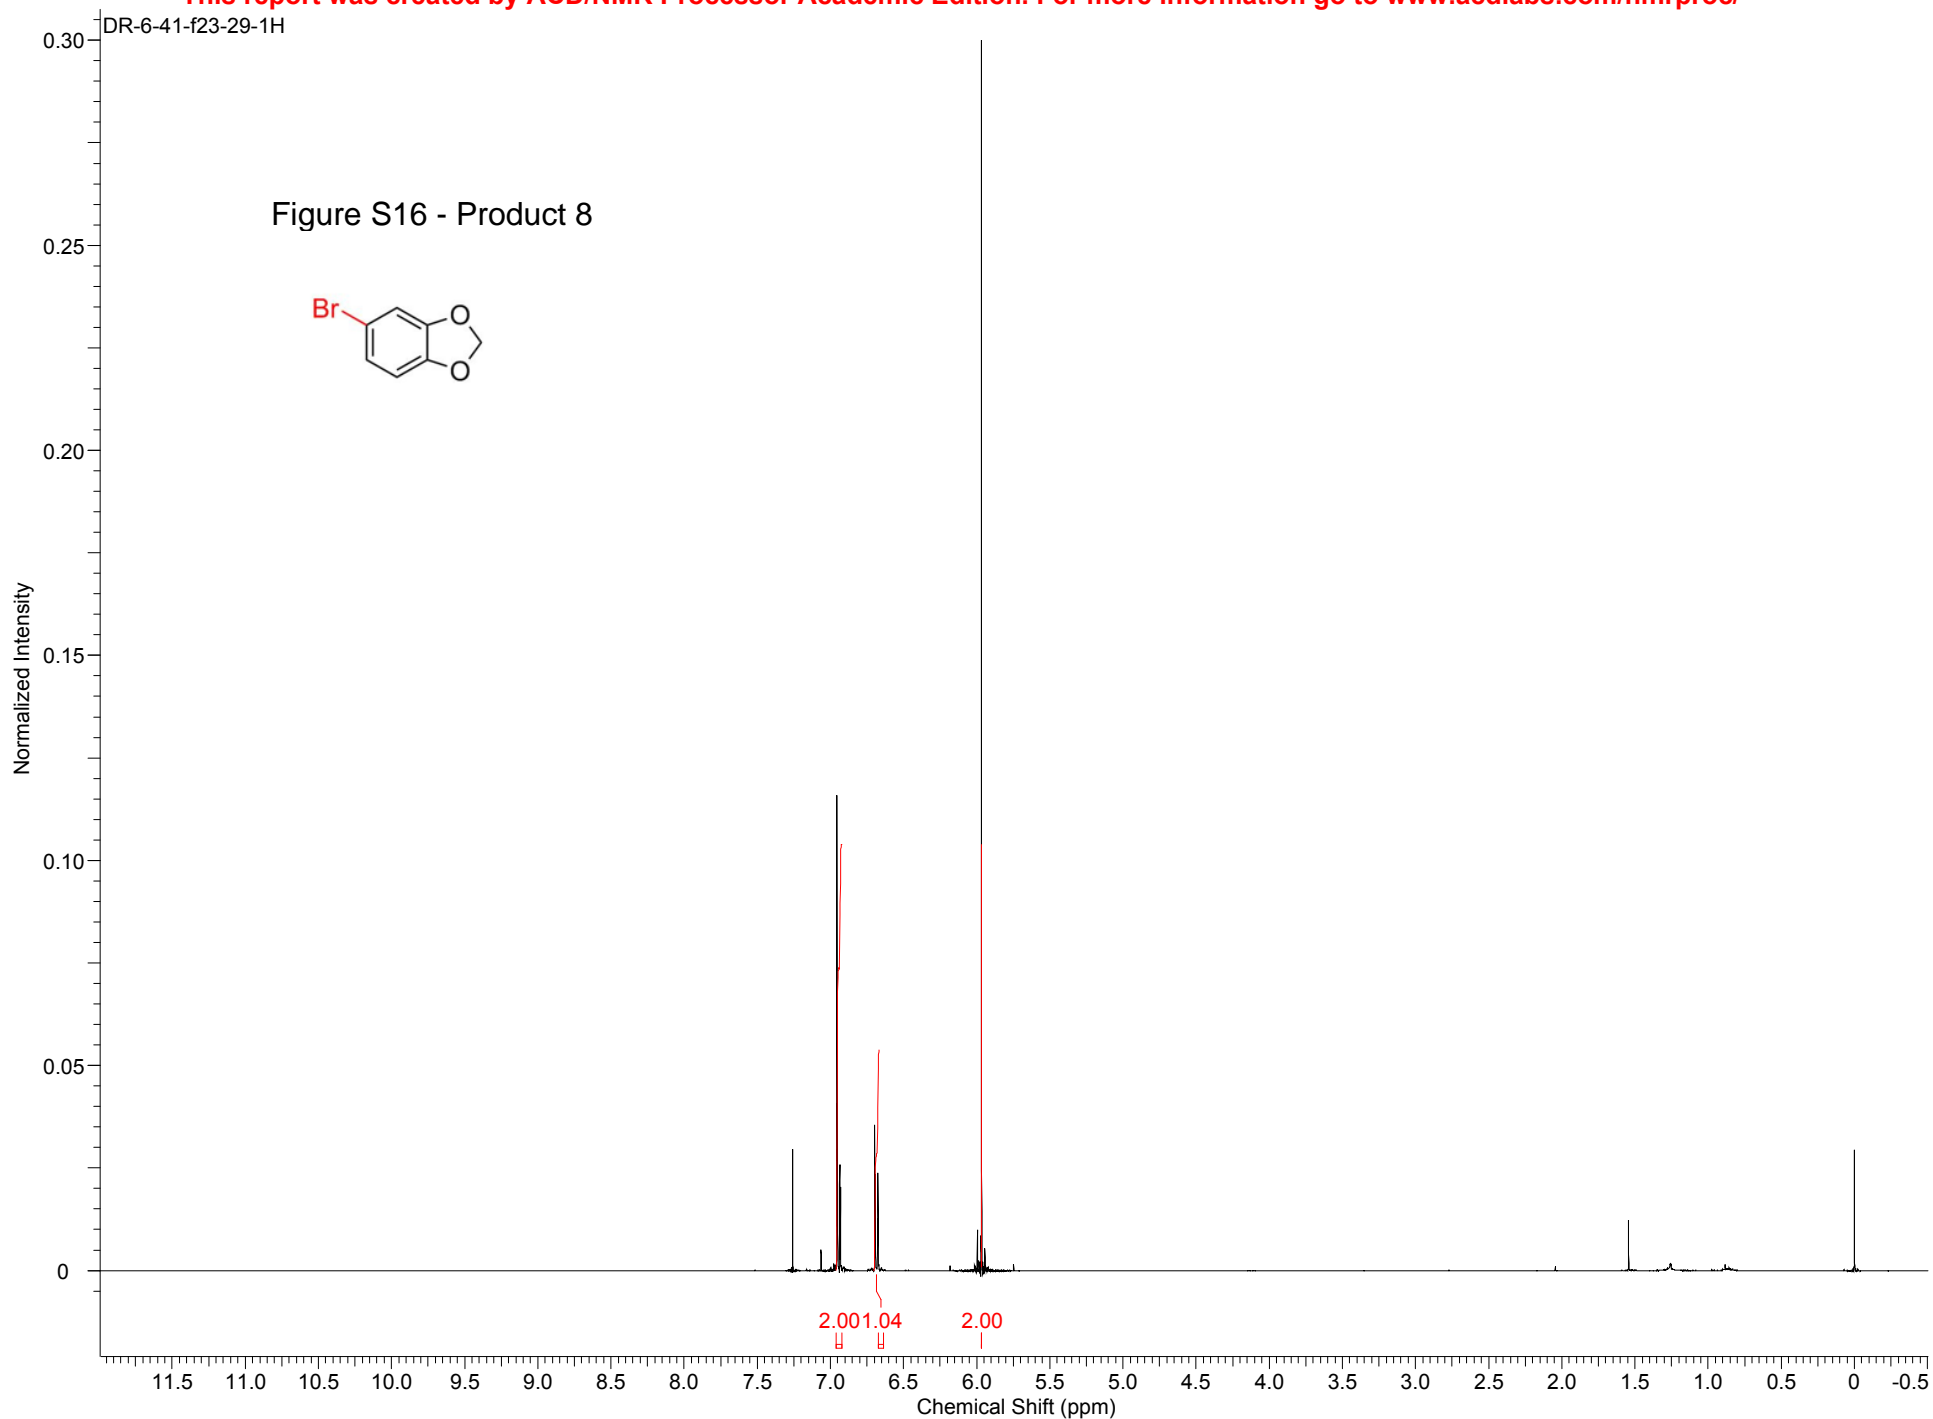



DR-6-41-F23-29-13C

Figure S17 - Product 8

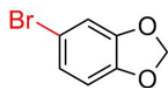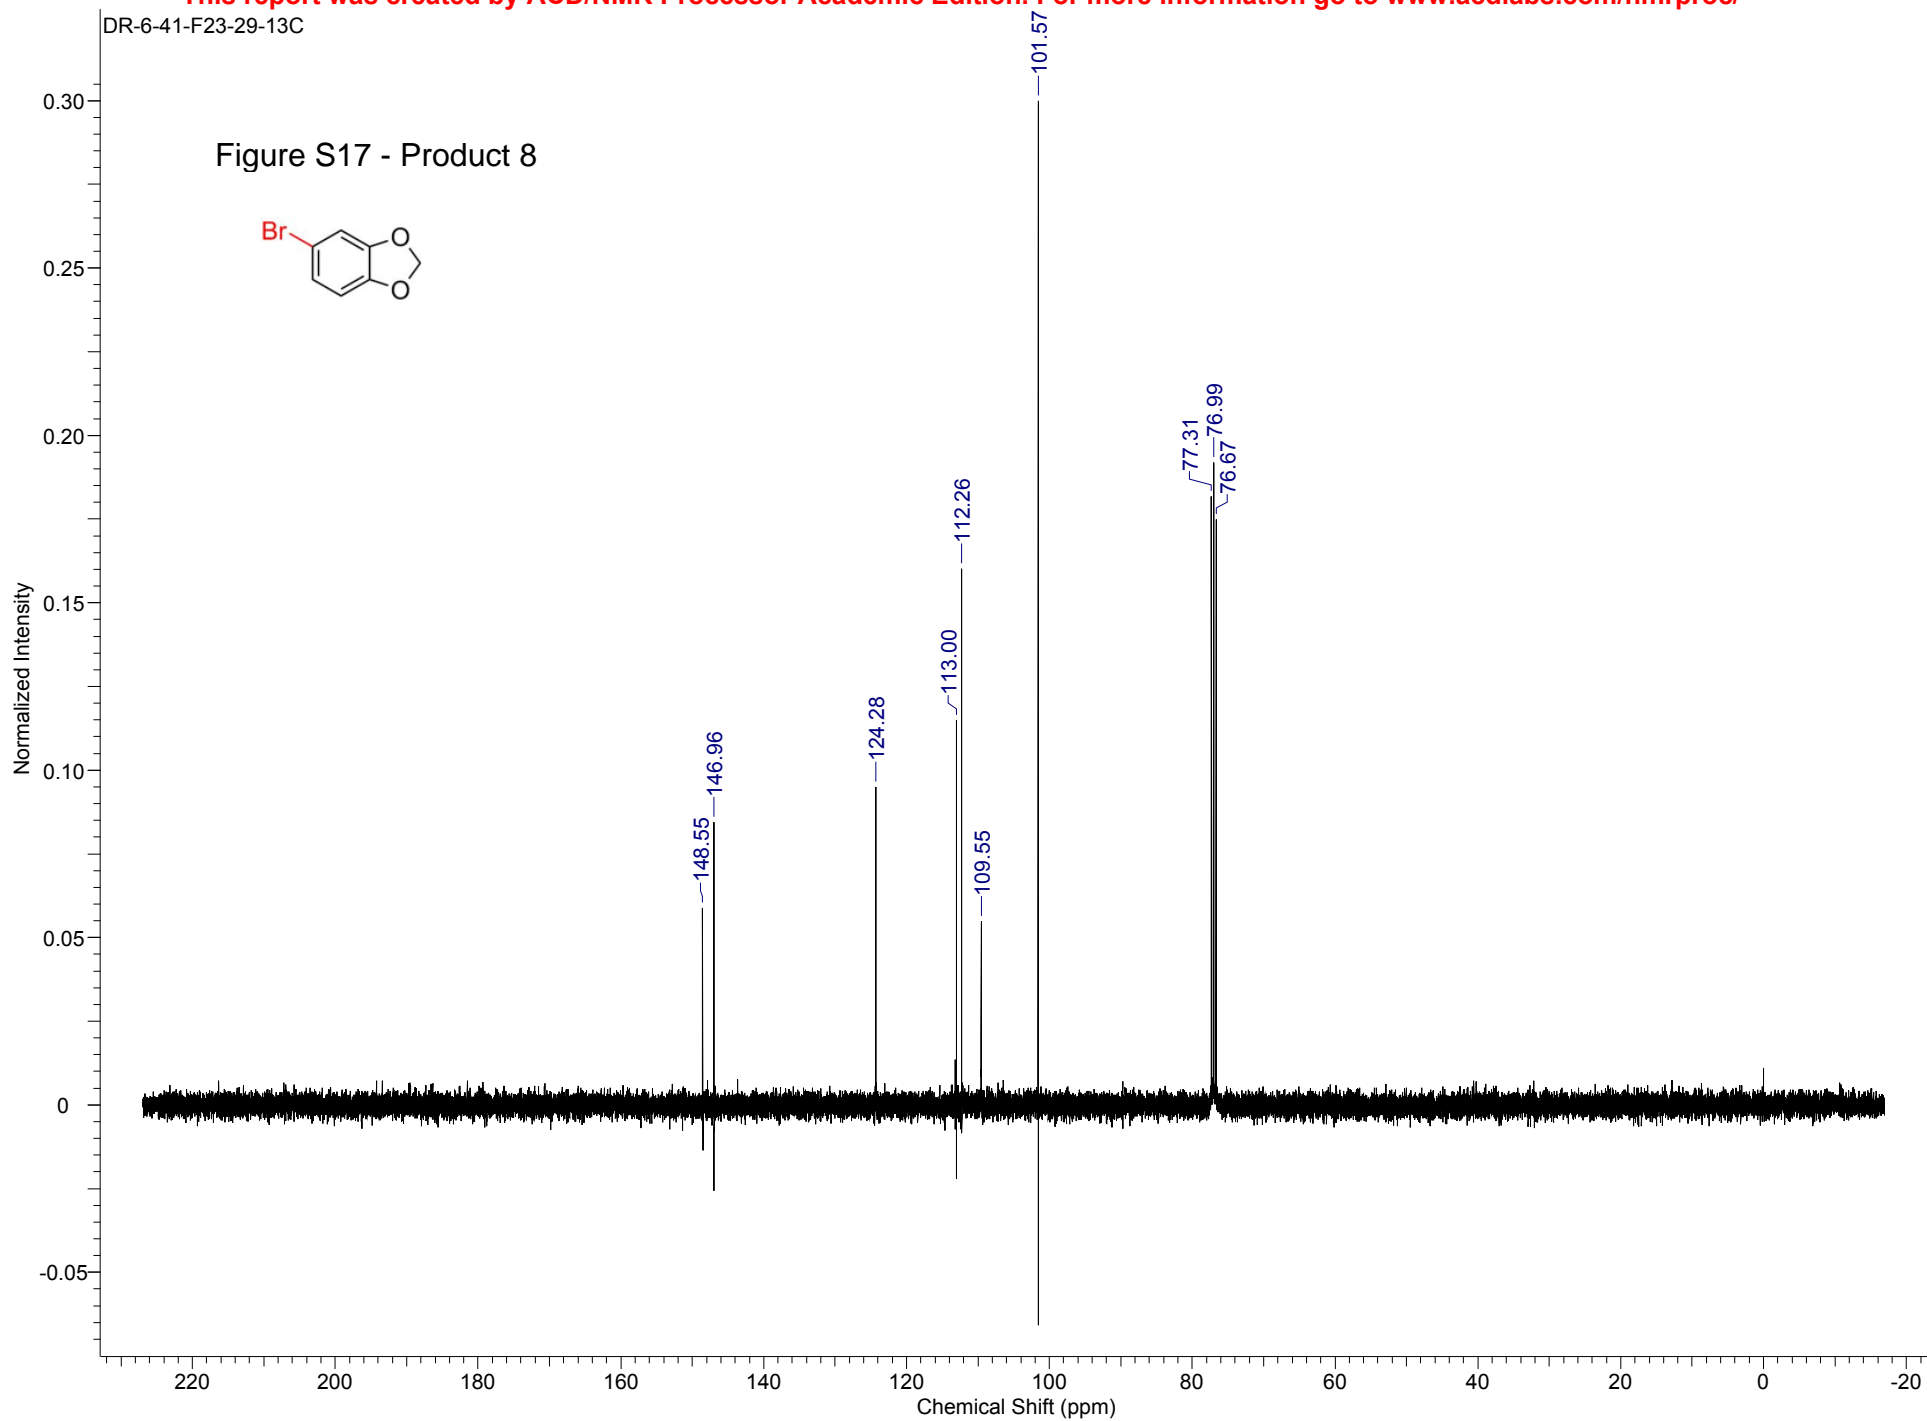

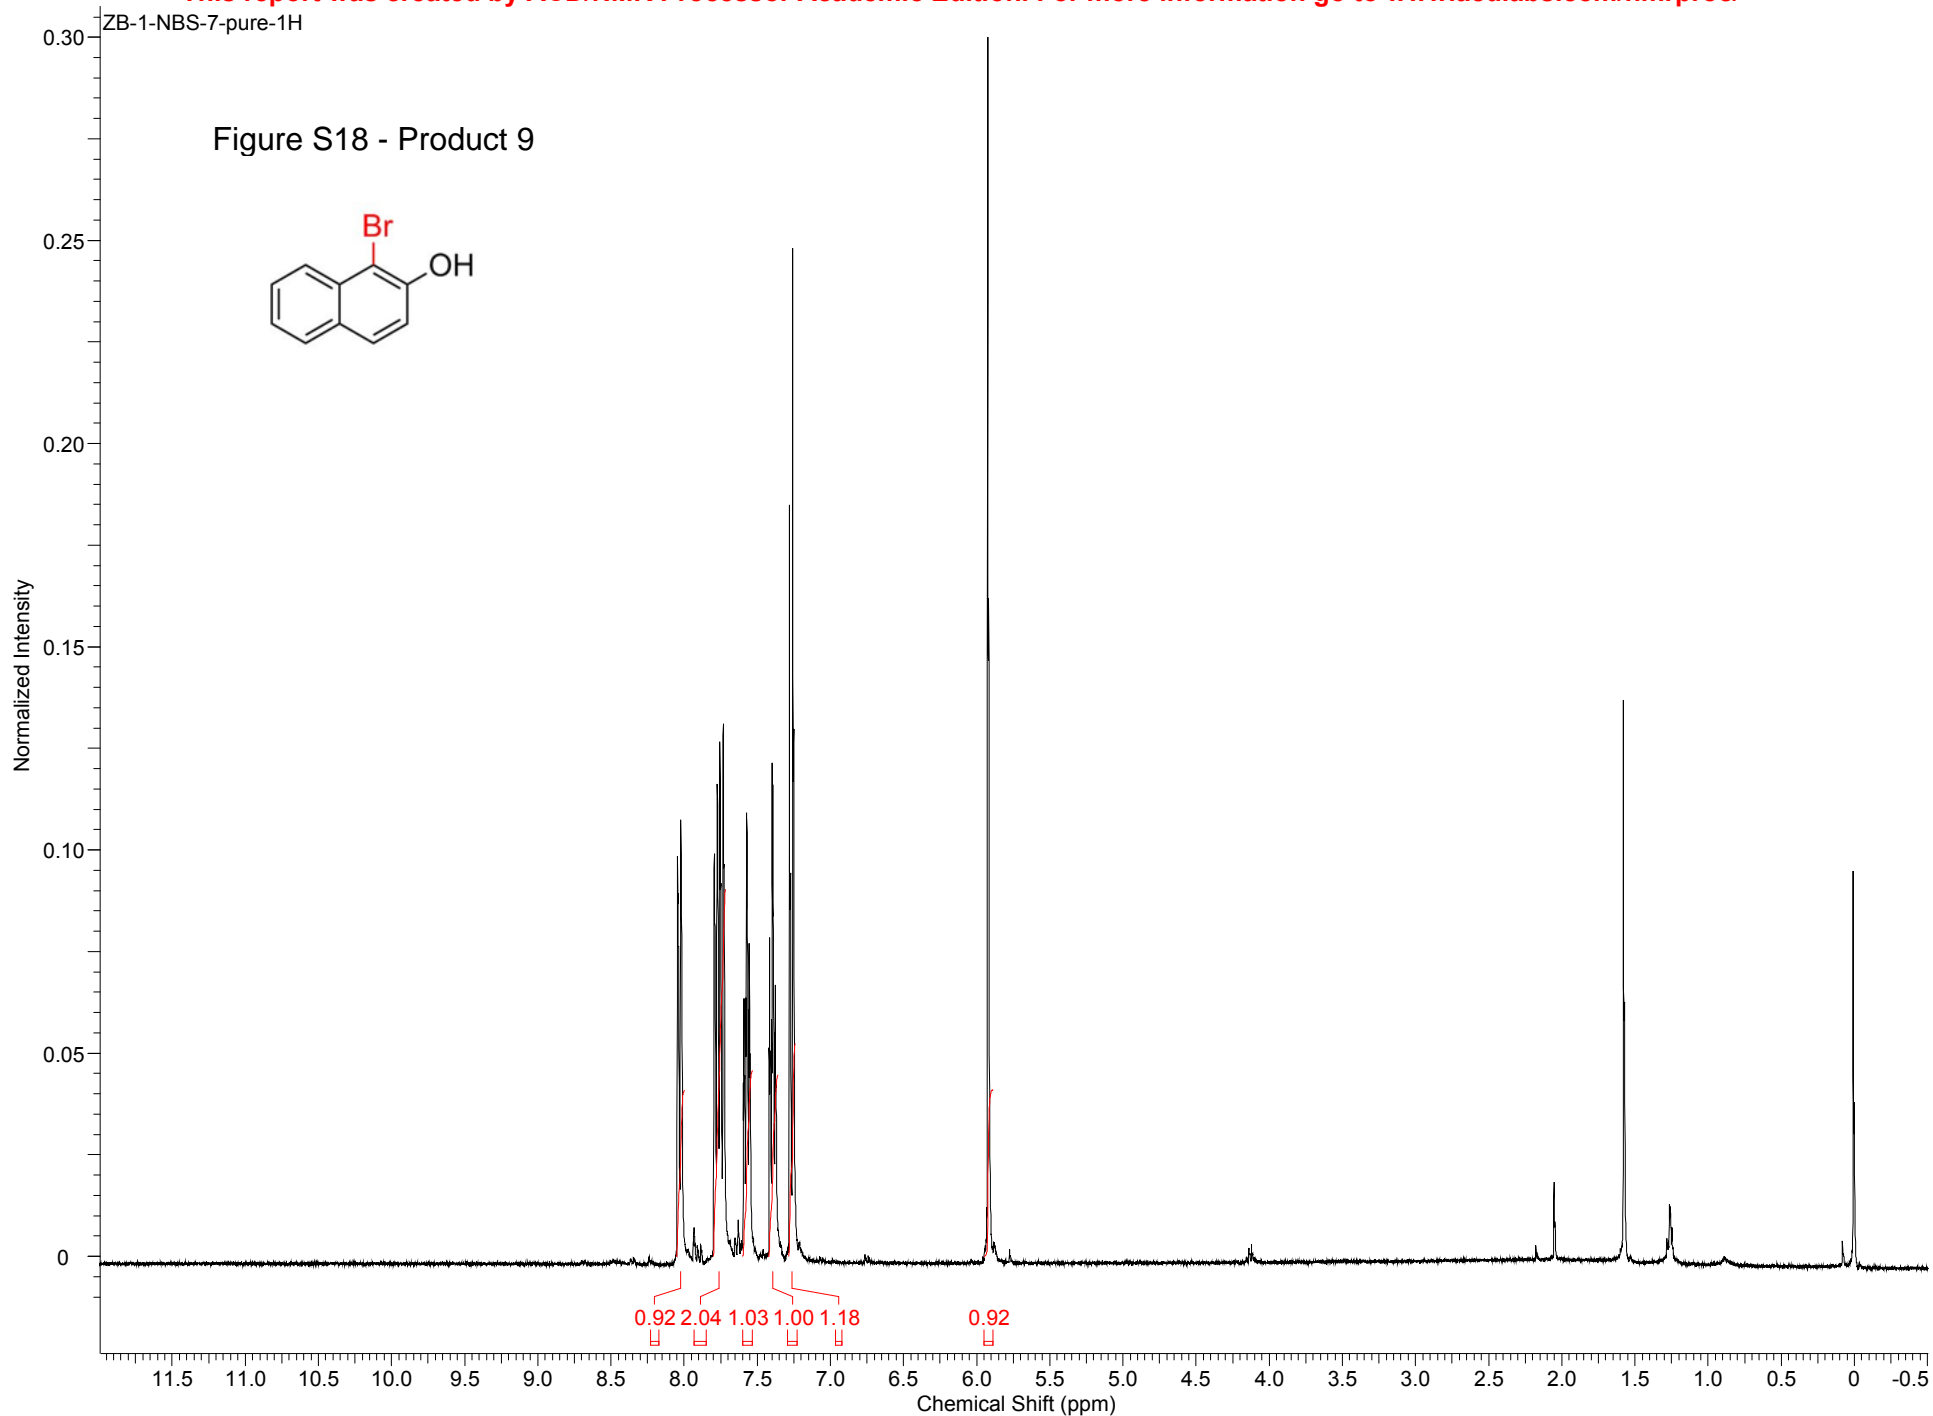

ZB-1-NBS-5-pure-13C

Figure S19 - Product 9

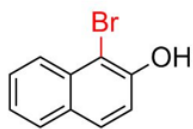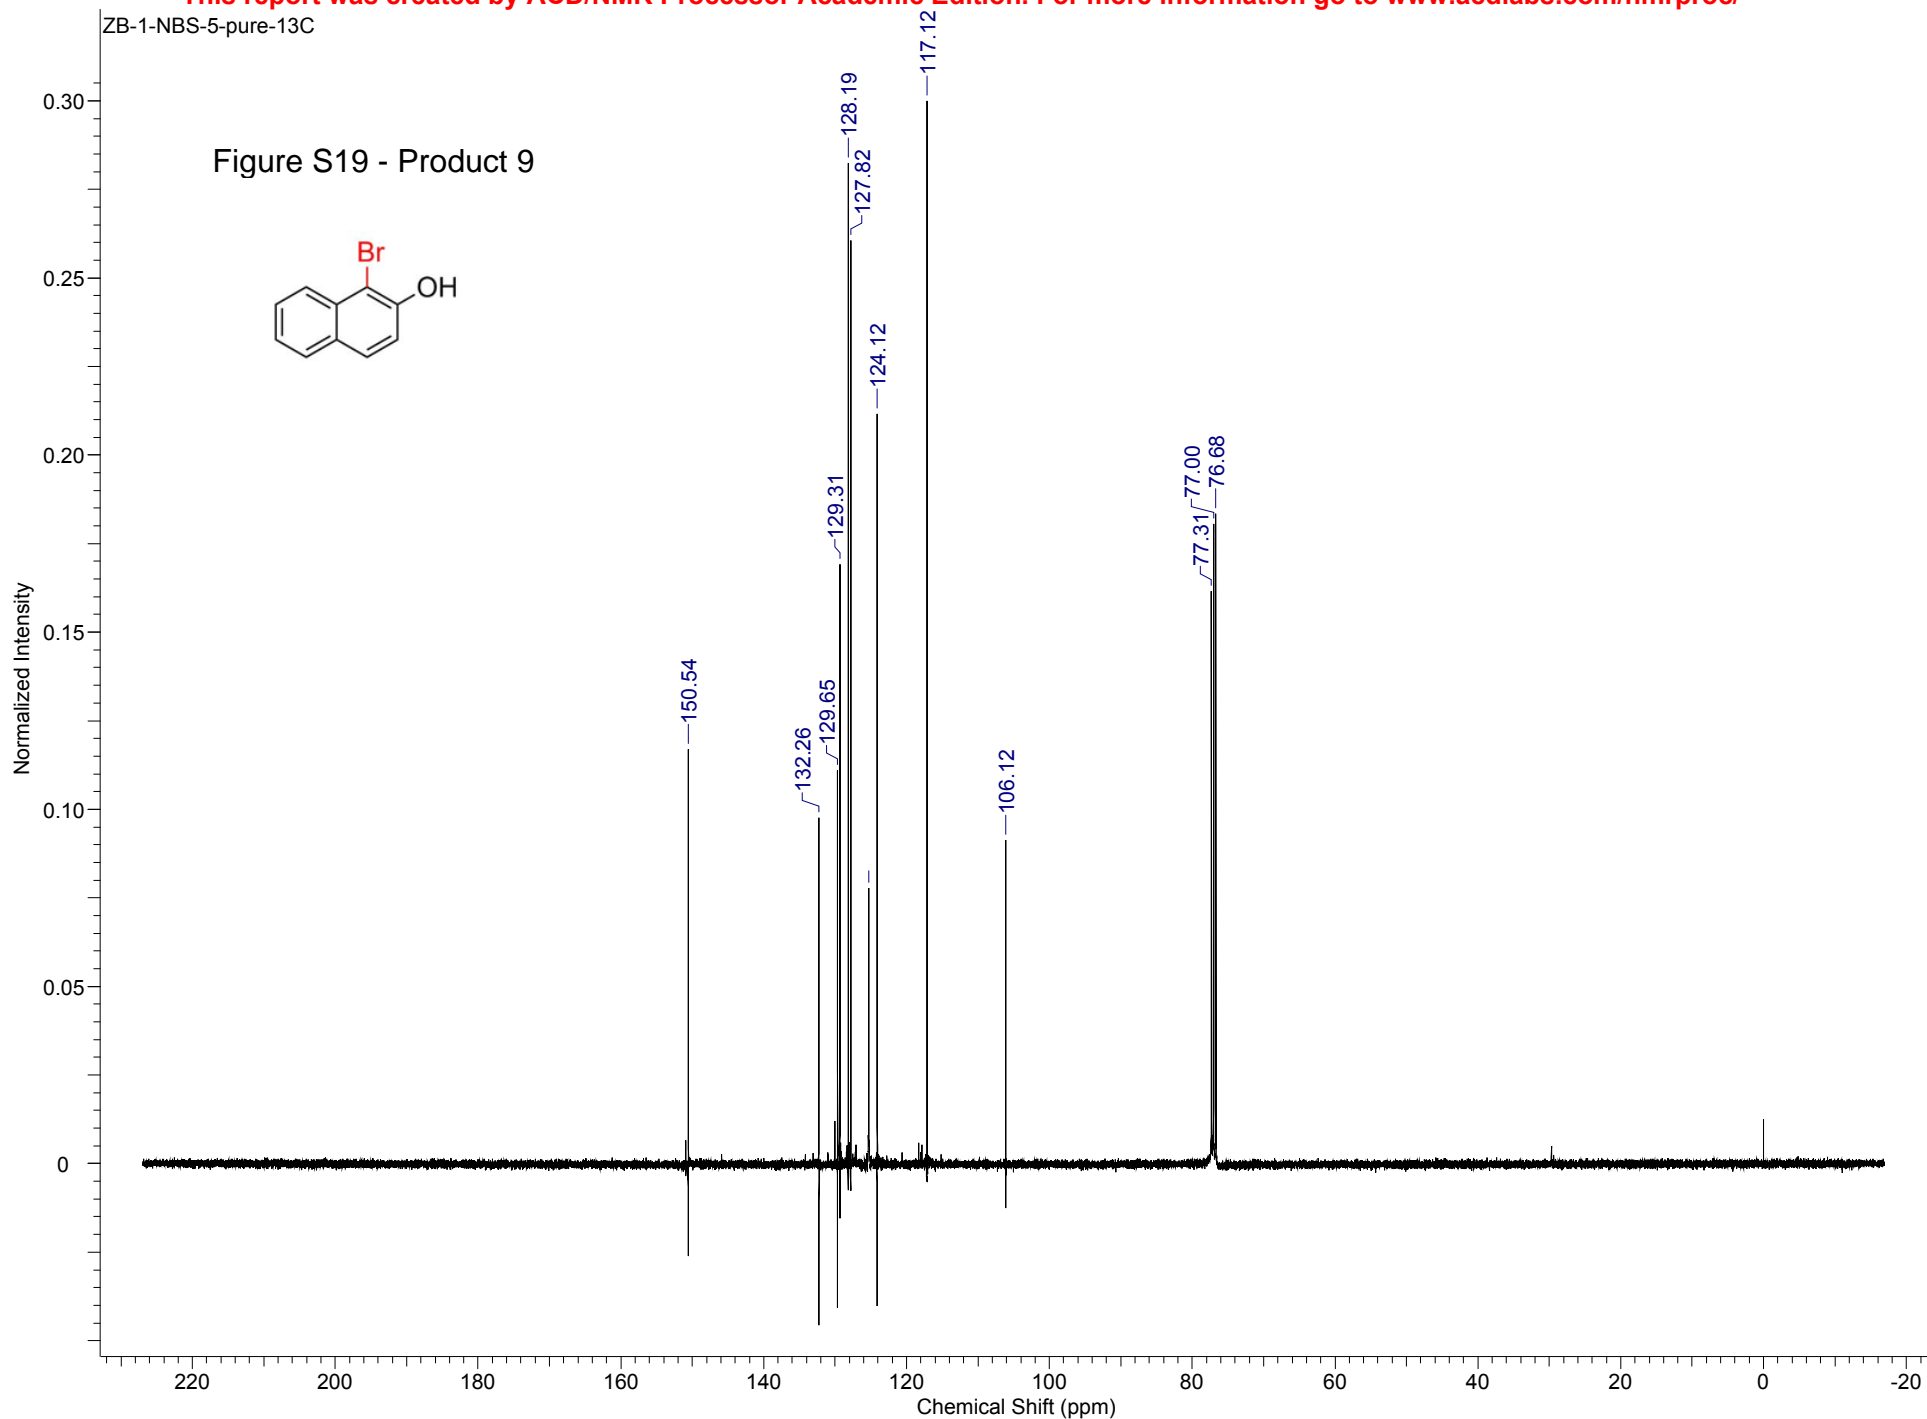

DR-5-152-F40-54-1H

Figure S20 - Product 10

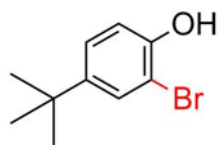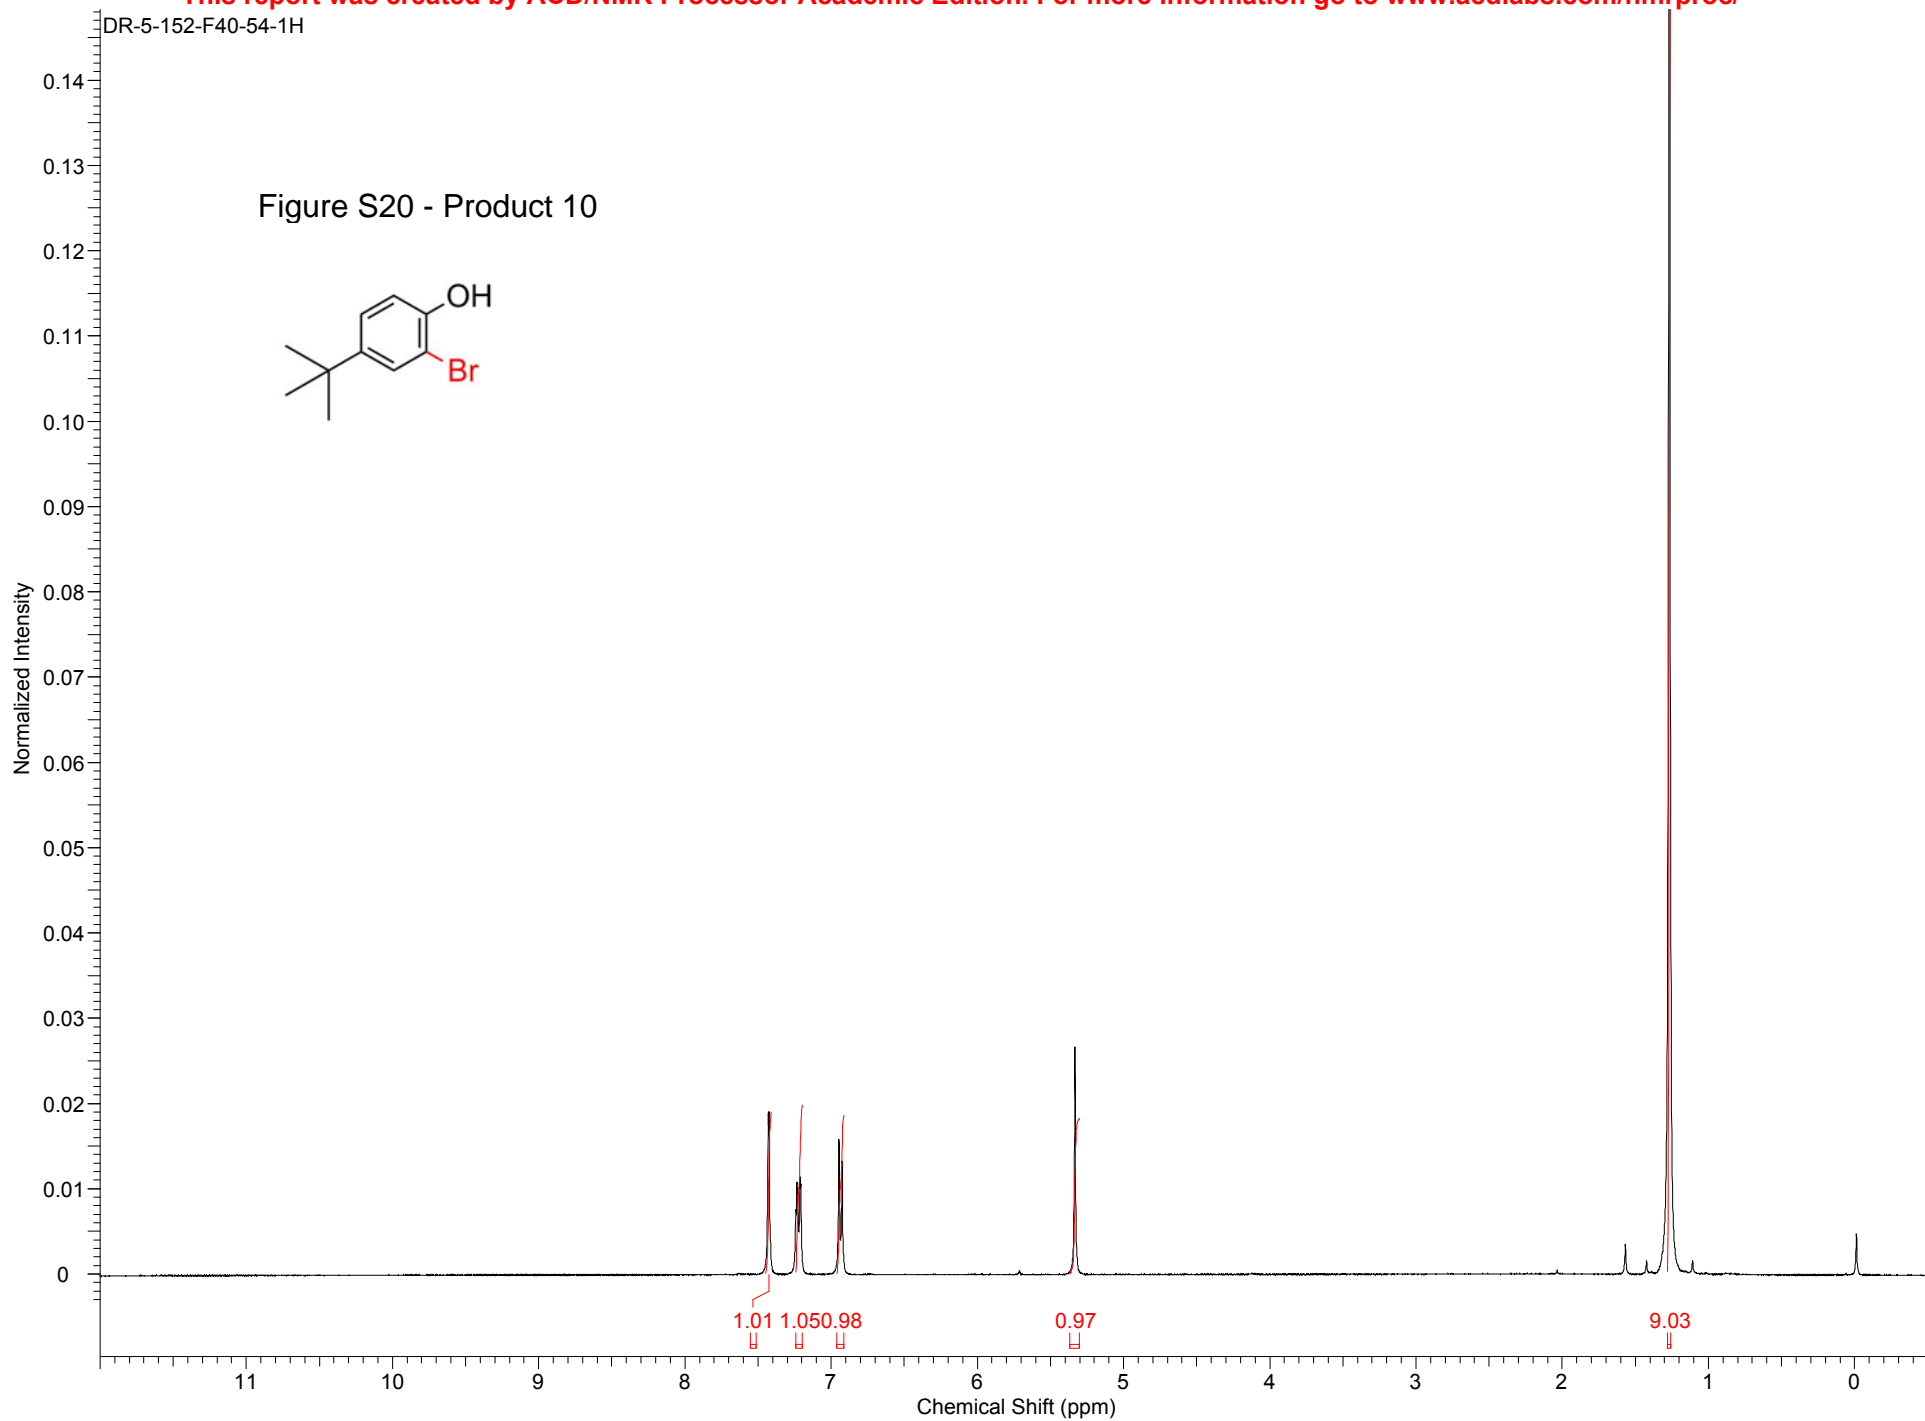

DR-5-152-13C

Figure S21 - Product 10

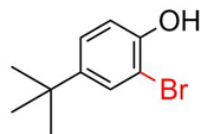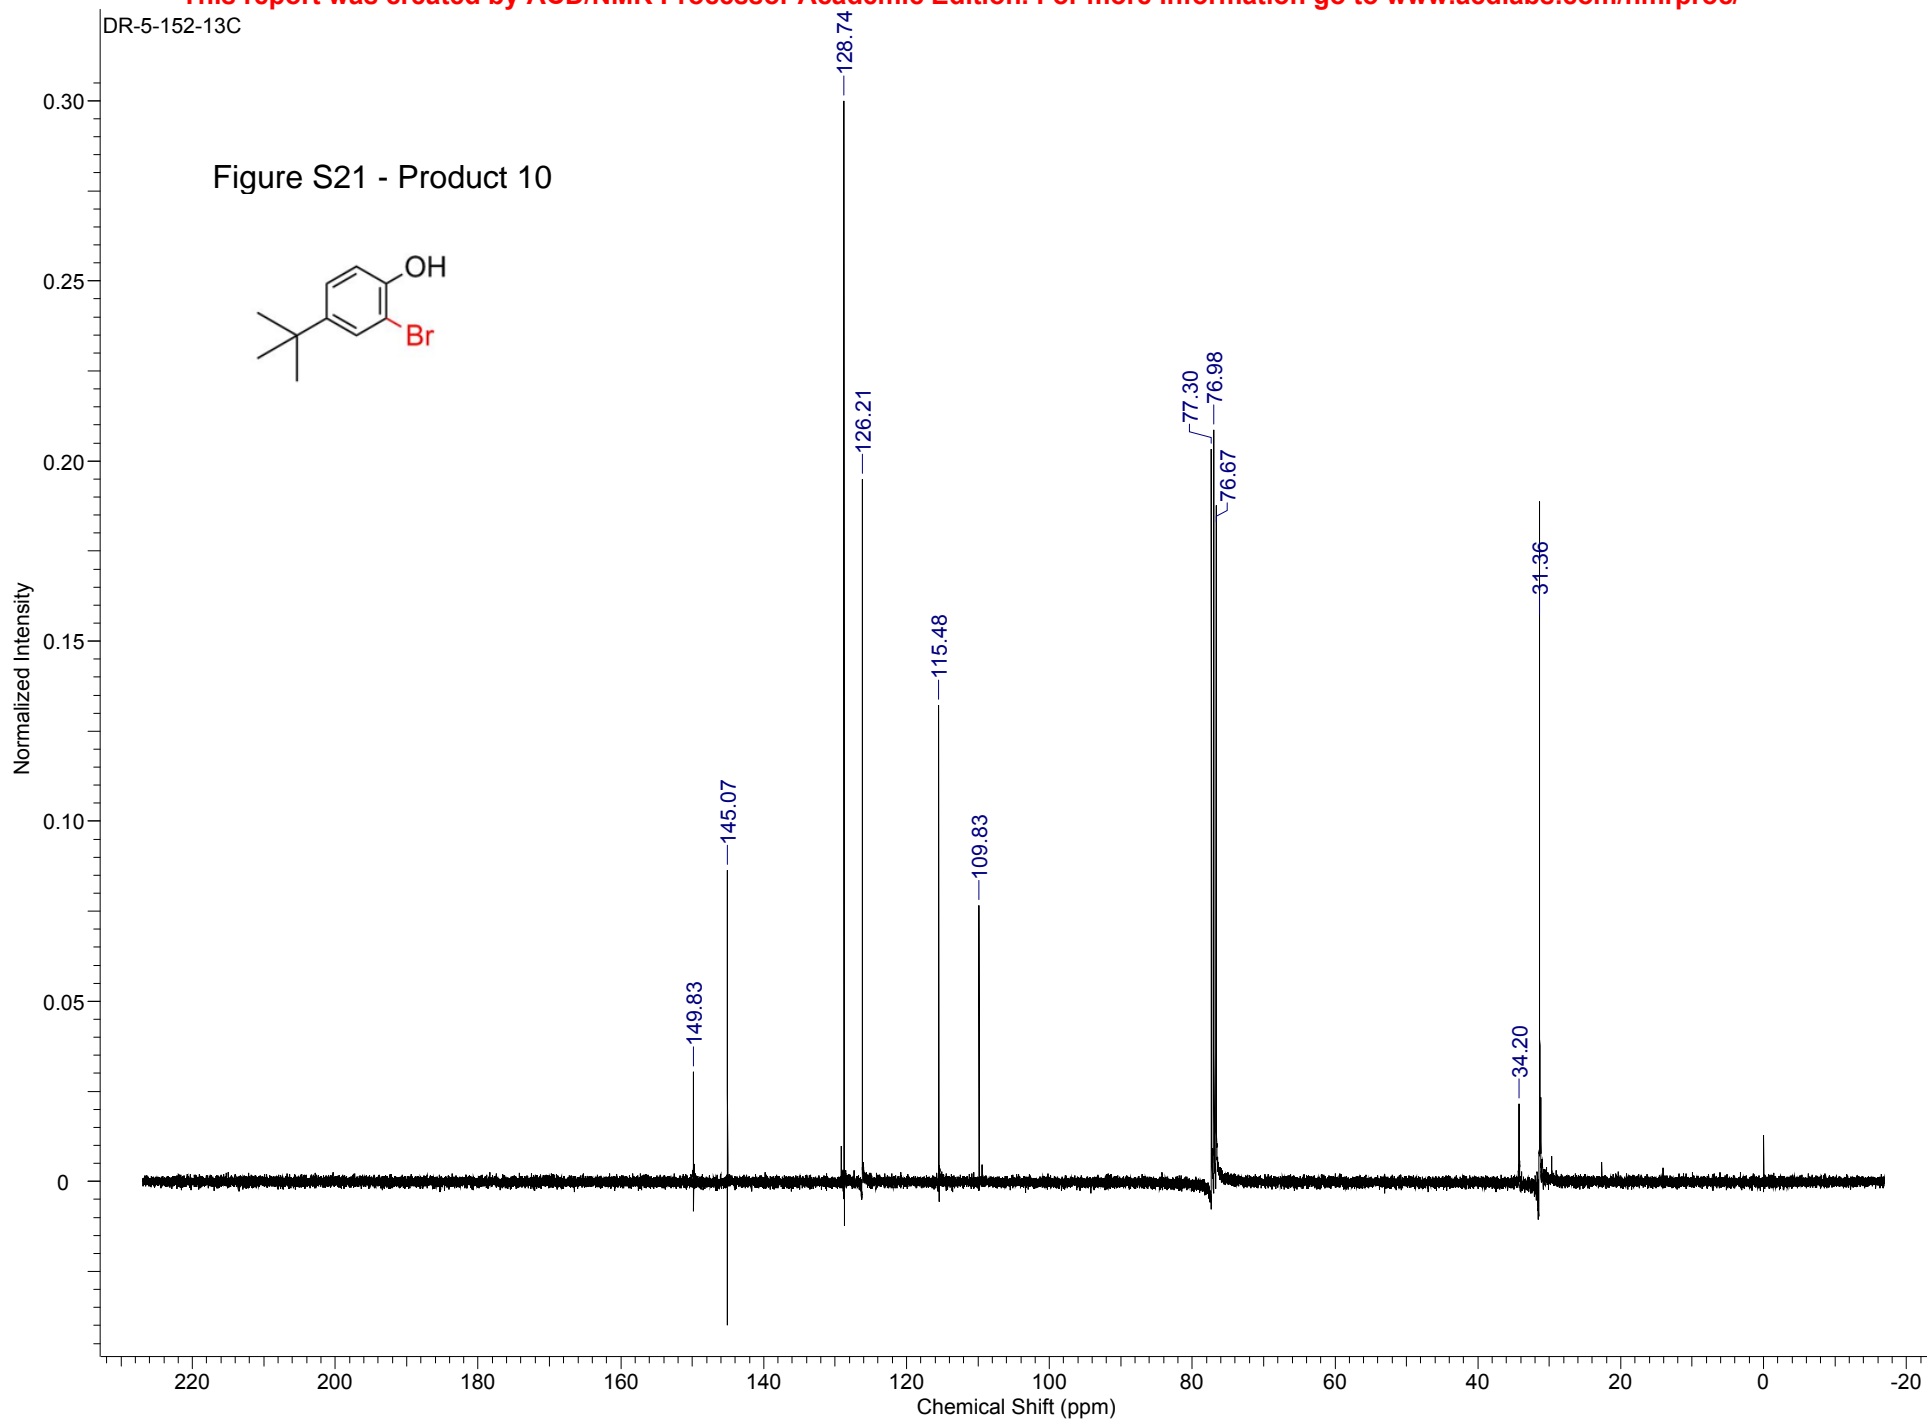

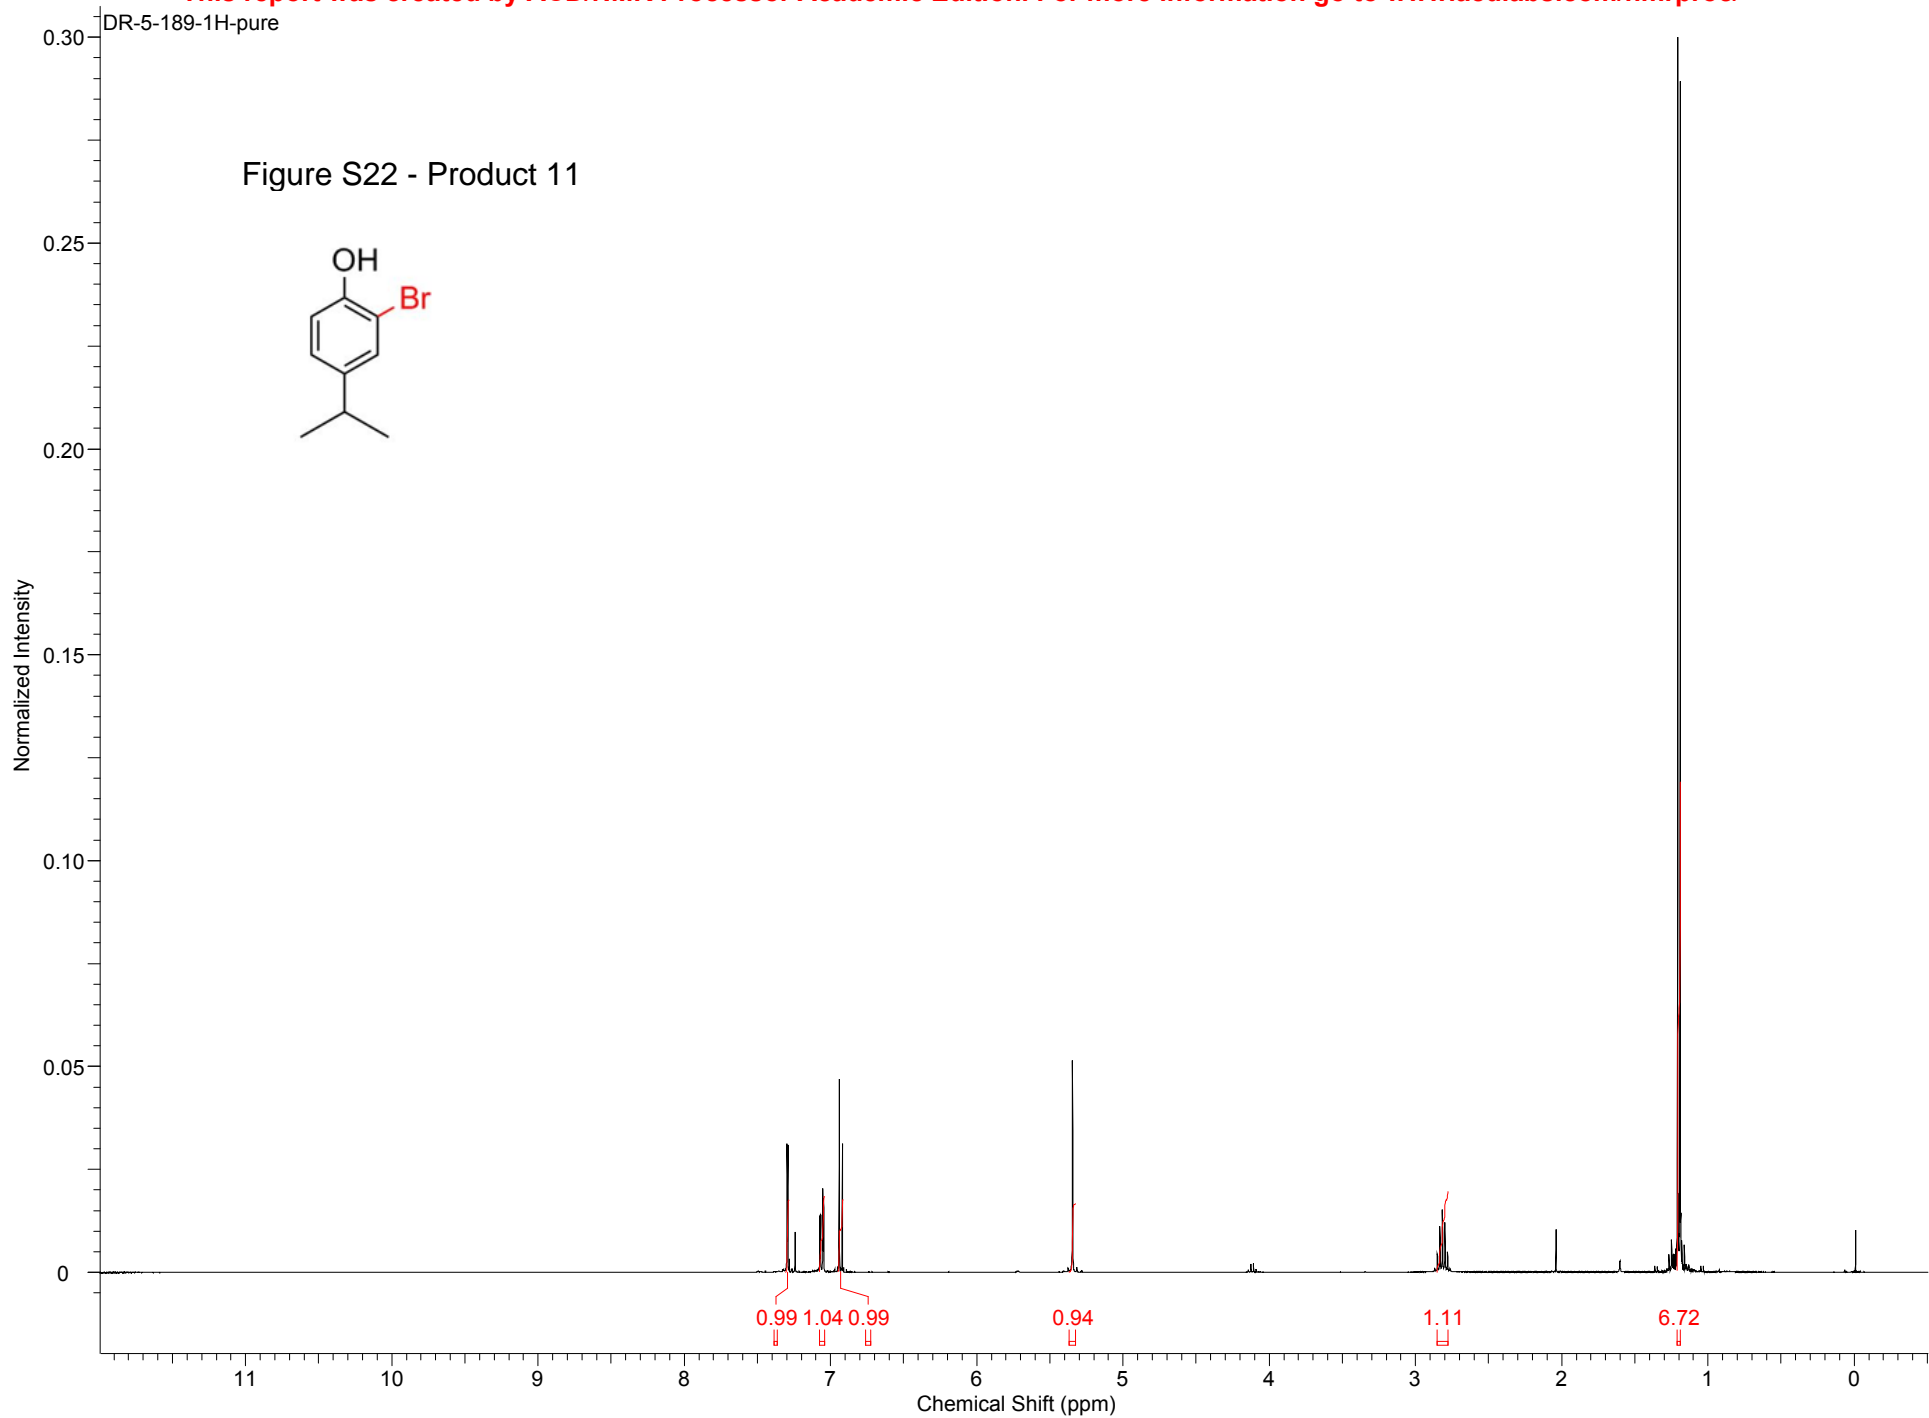

DR-5-189-13C-pure-FEB16

Figure S23 - Product 11

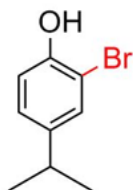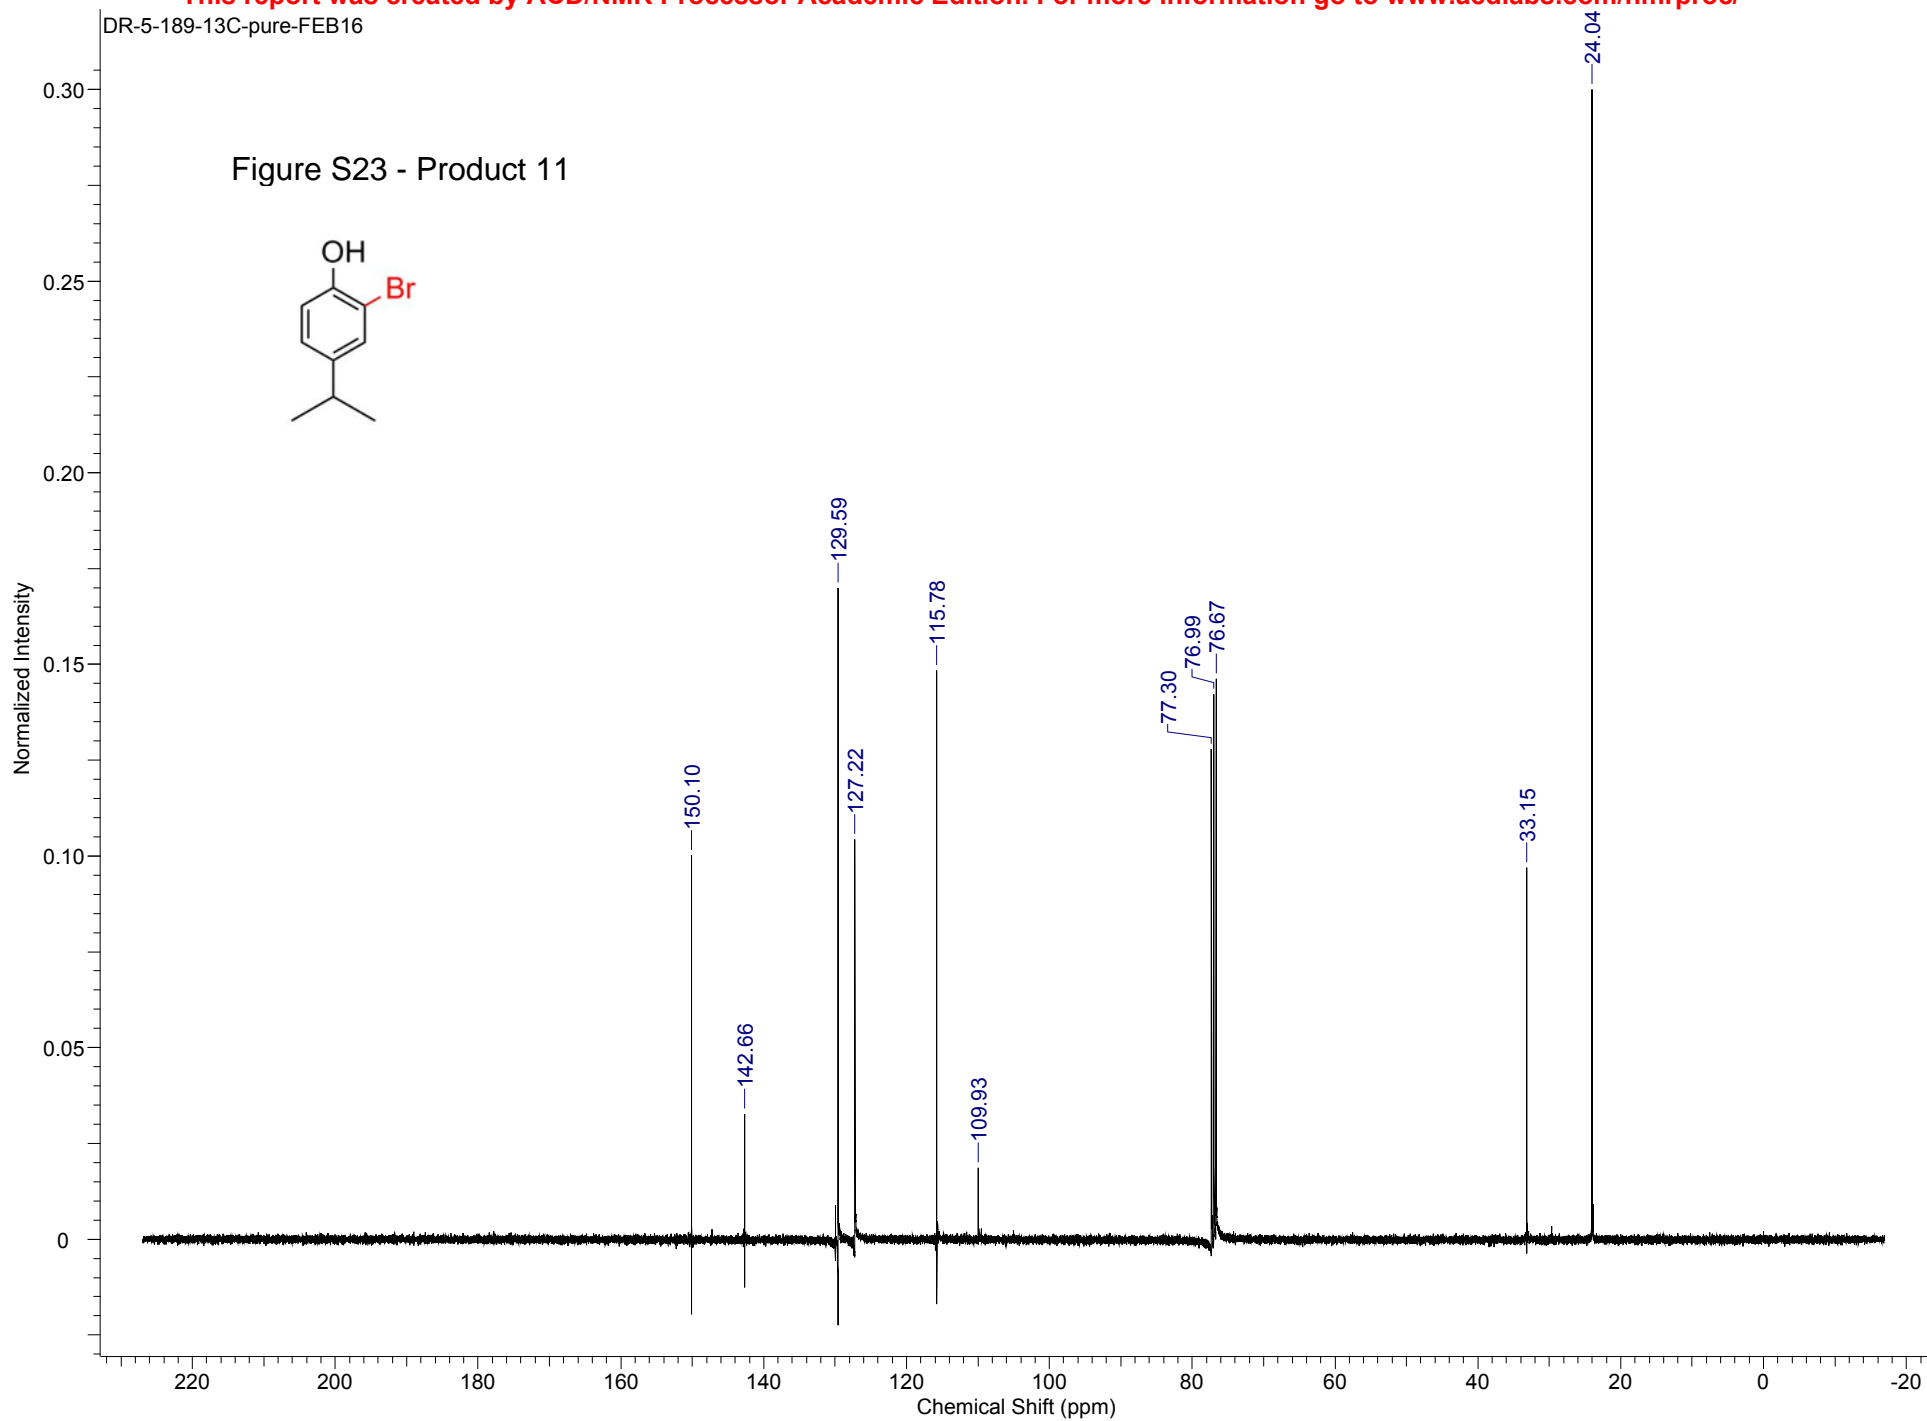

DR-6-122-F15-18-1H

Figure S24 - Product 12

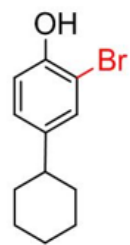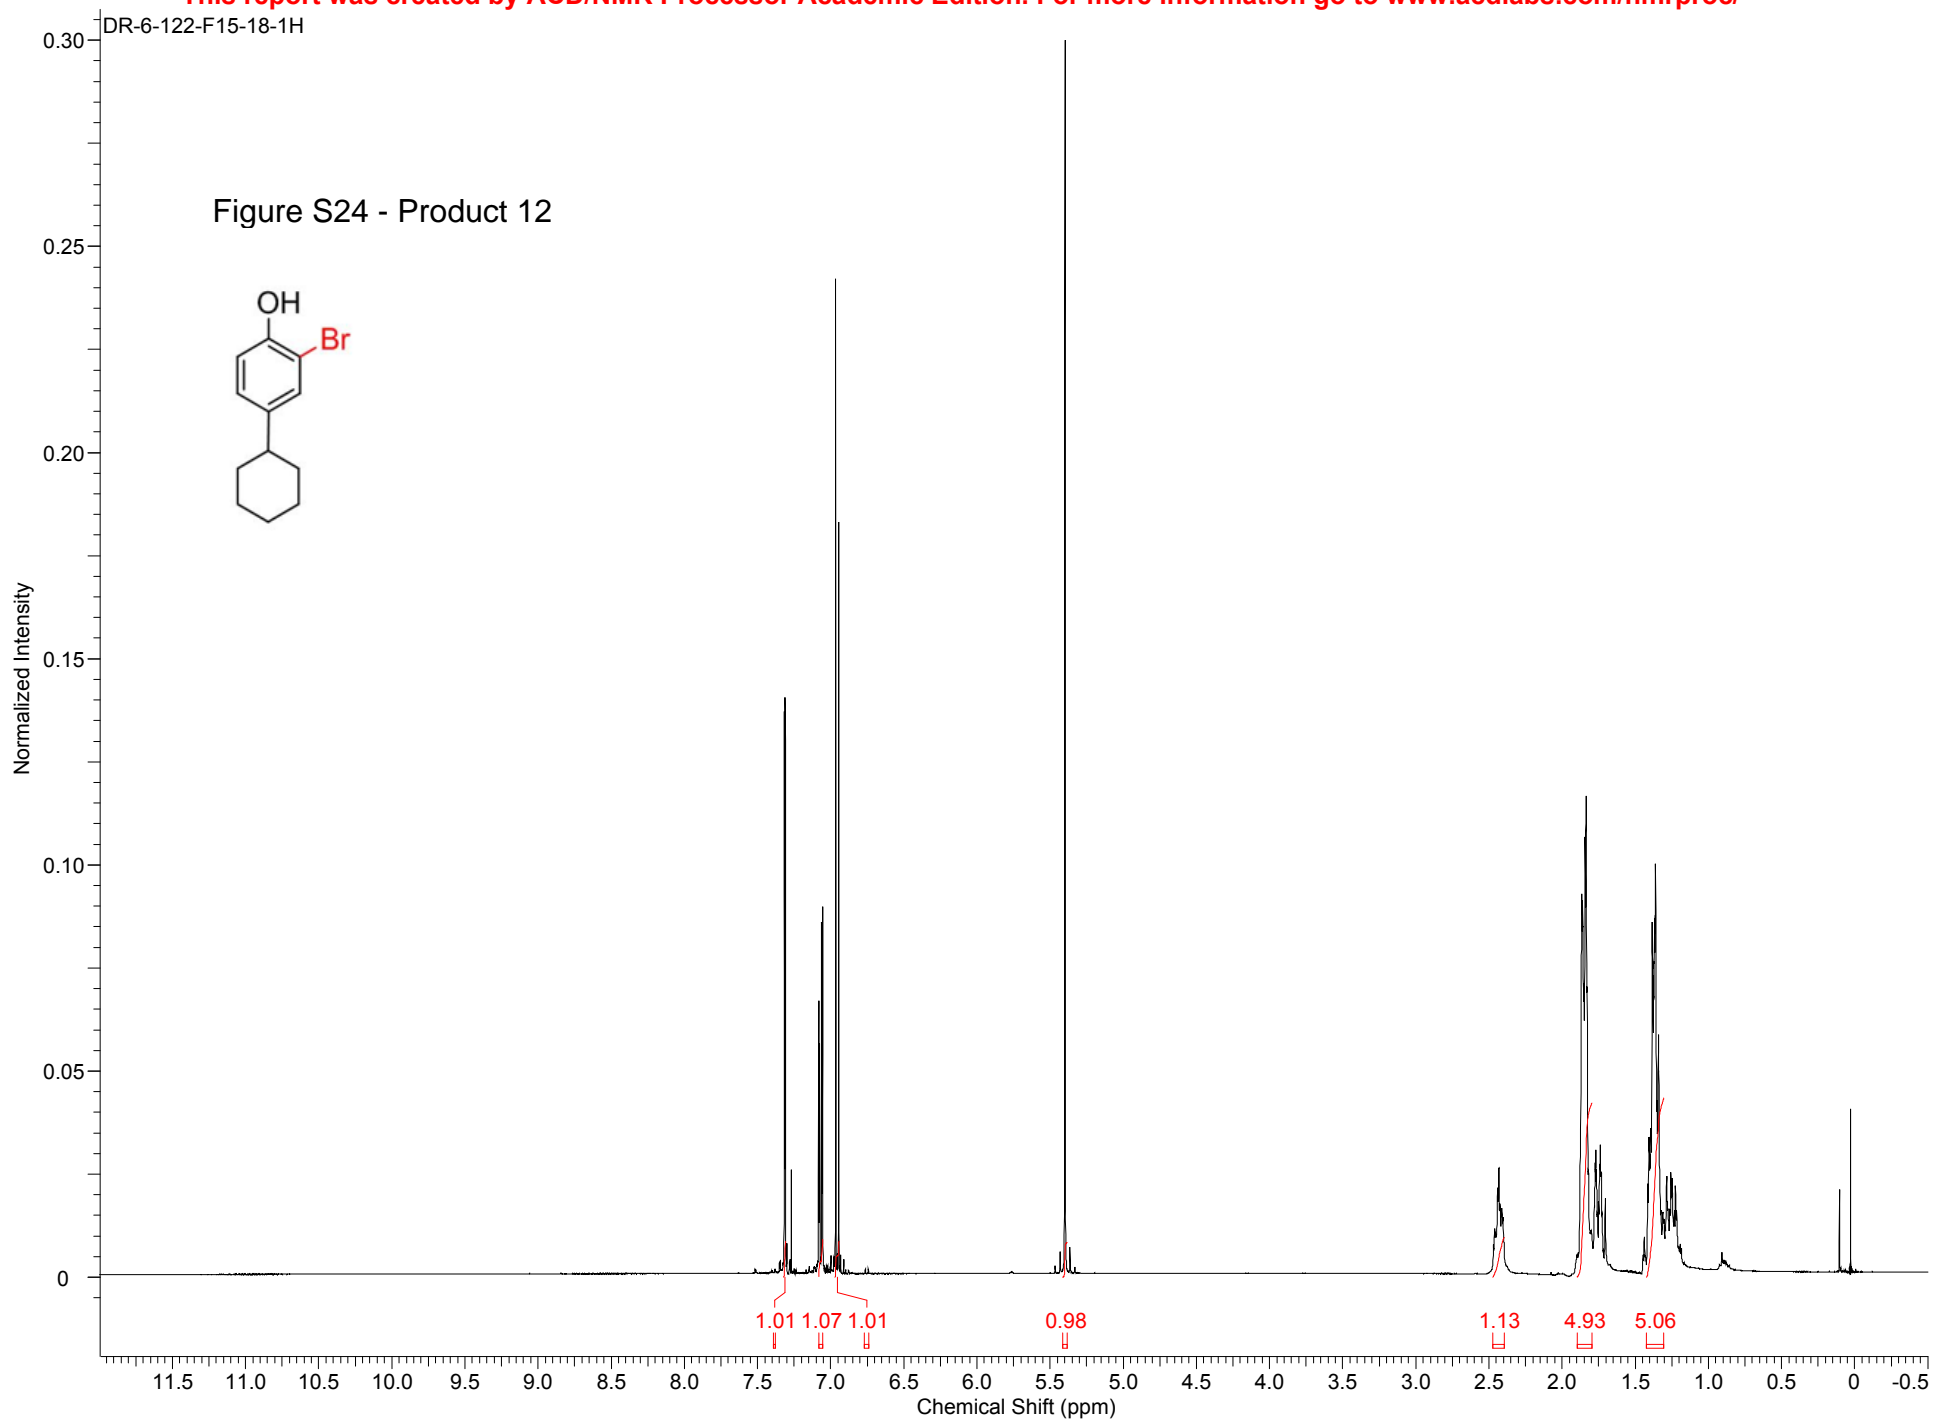



DR-6-122-13C

Figure S25 - Product 12

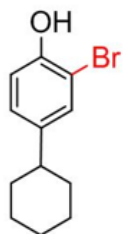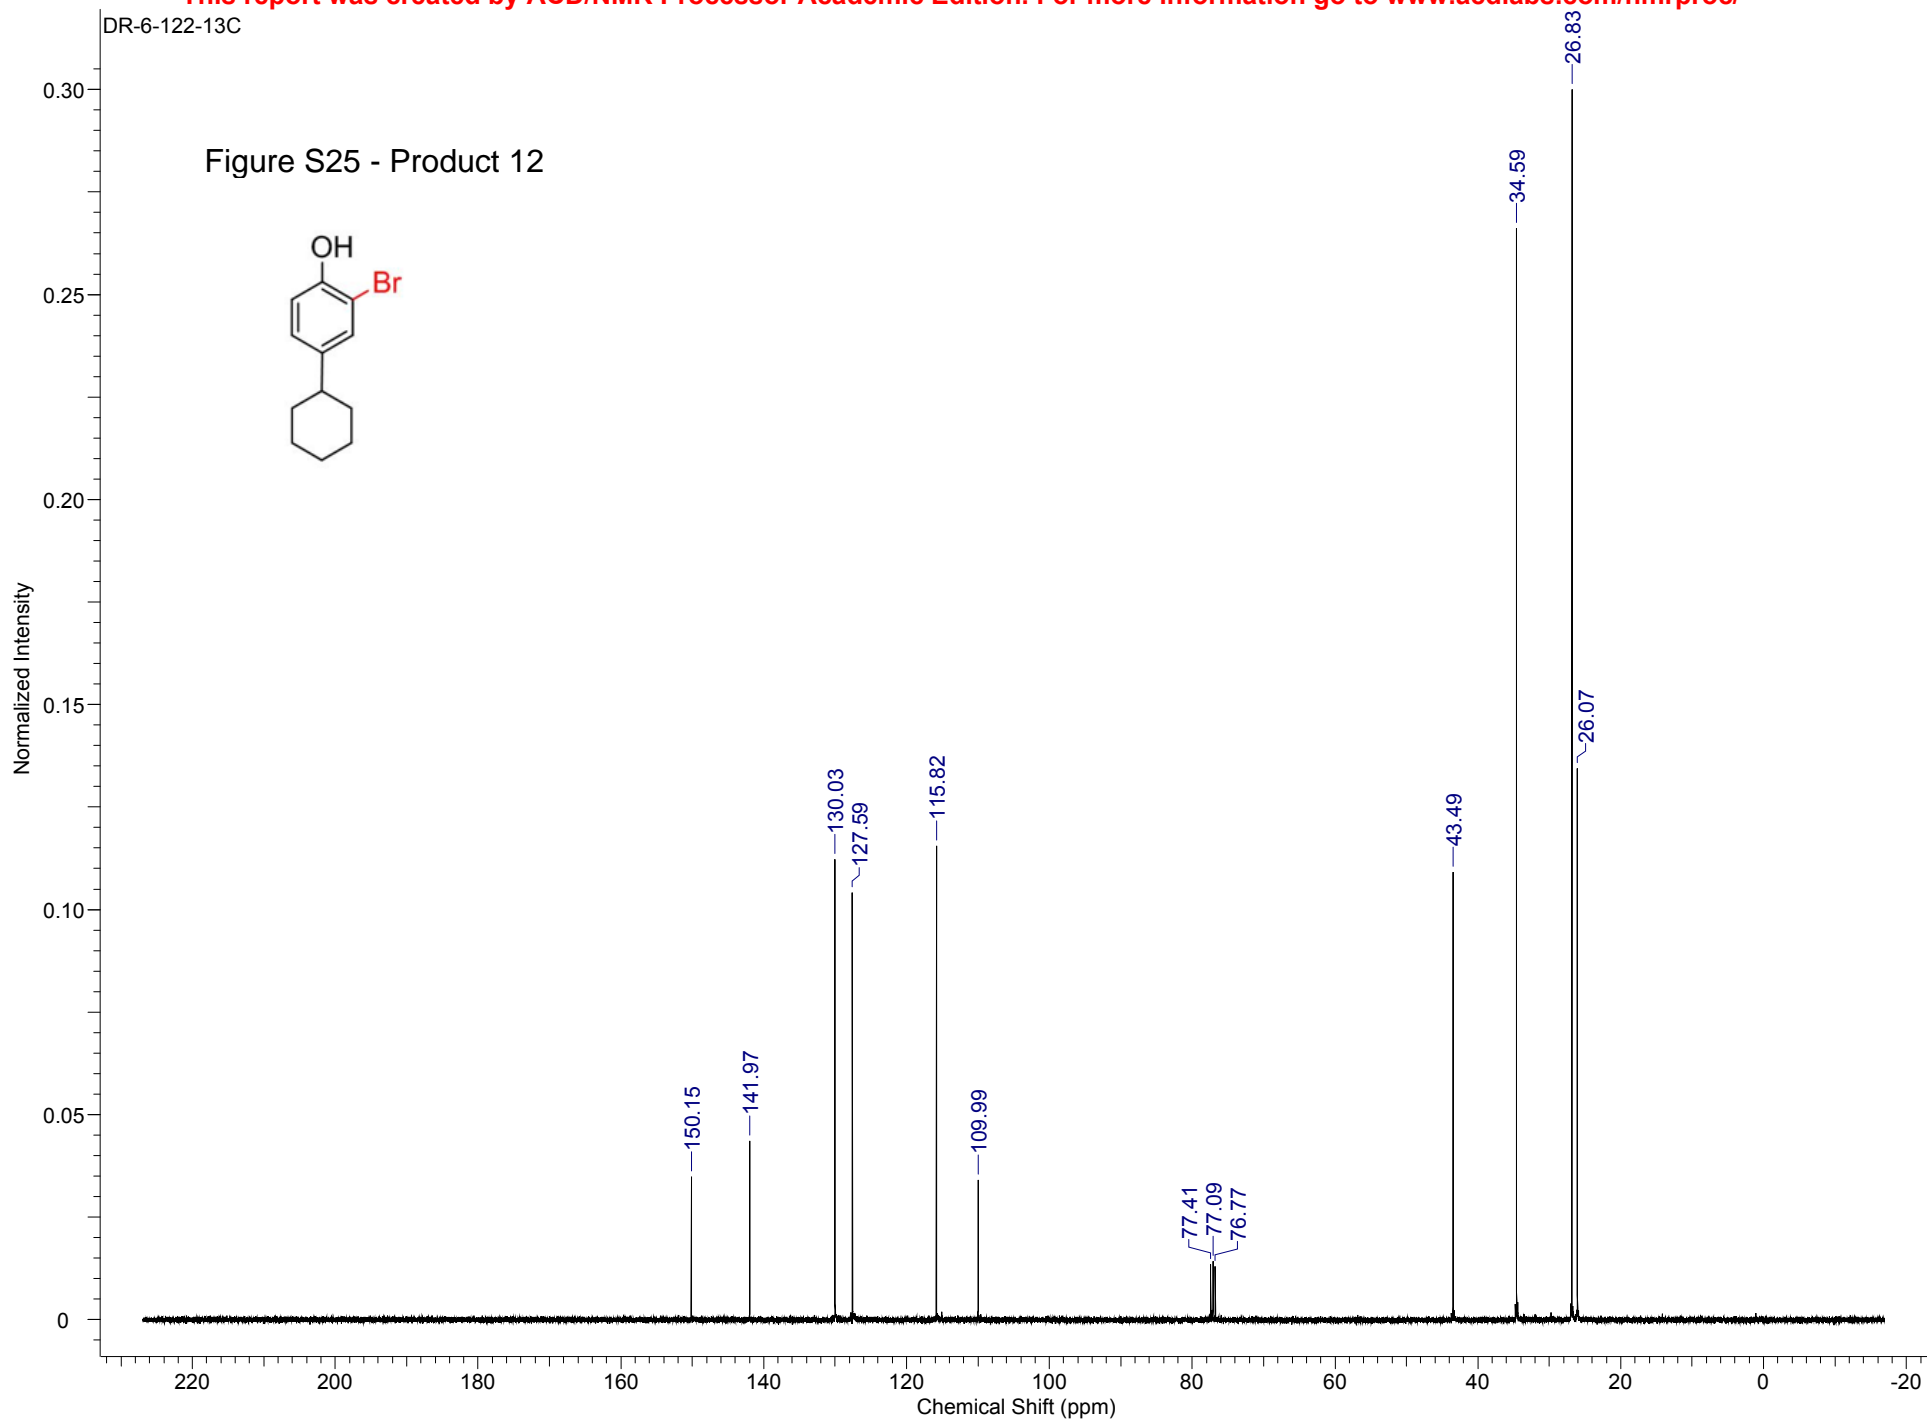

DR-5-140

Figure S26 Product 13

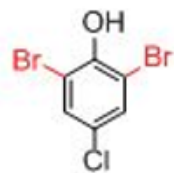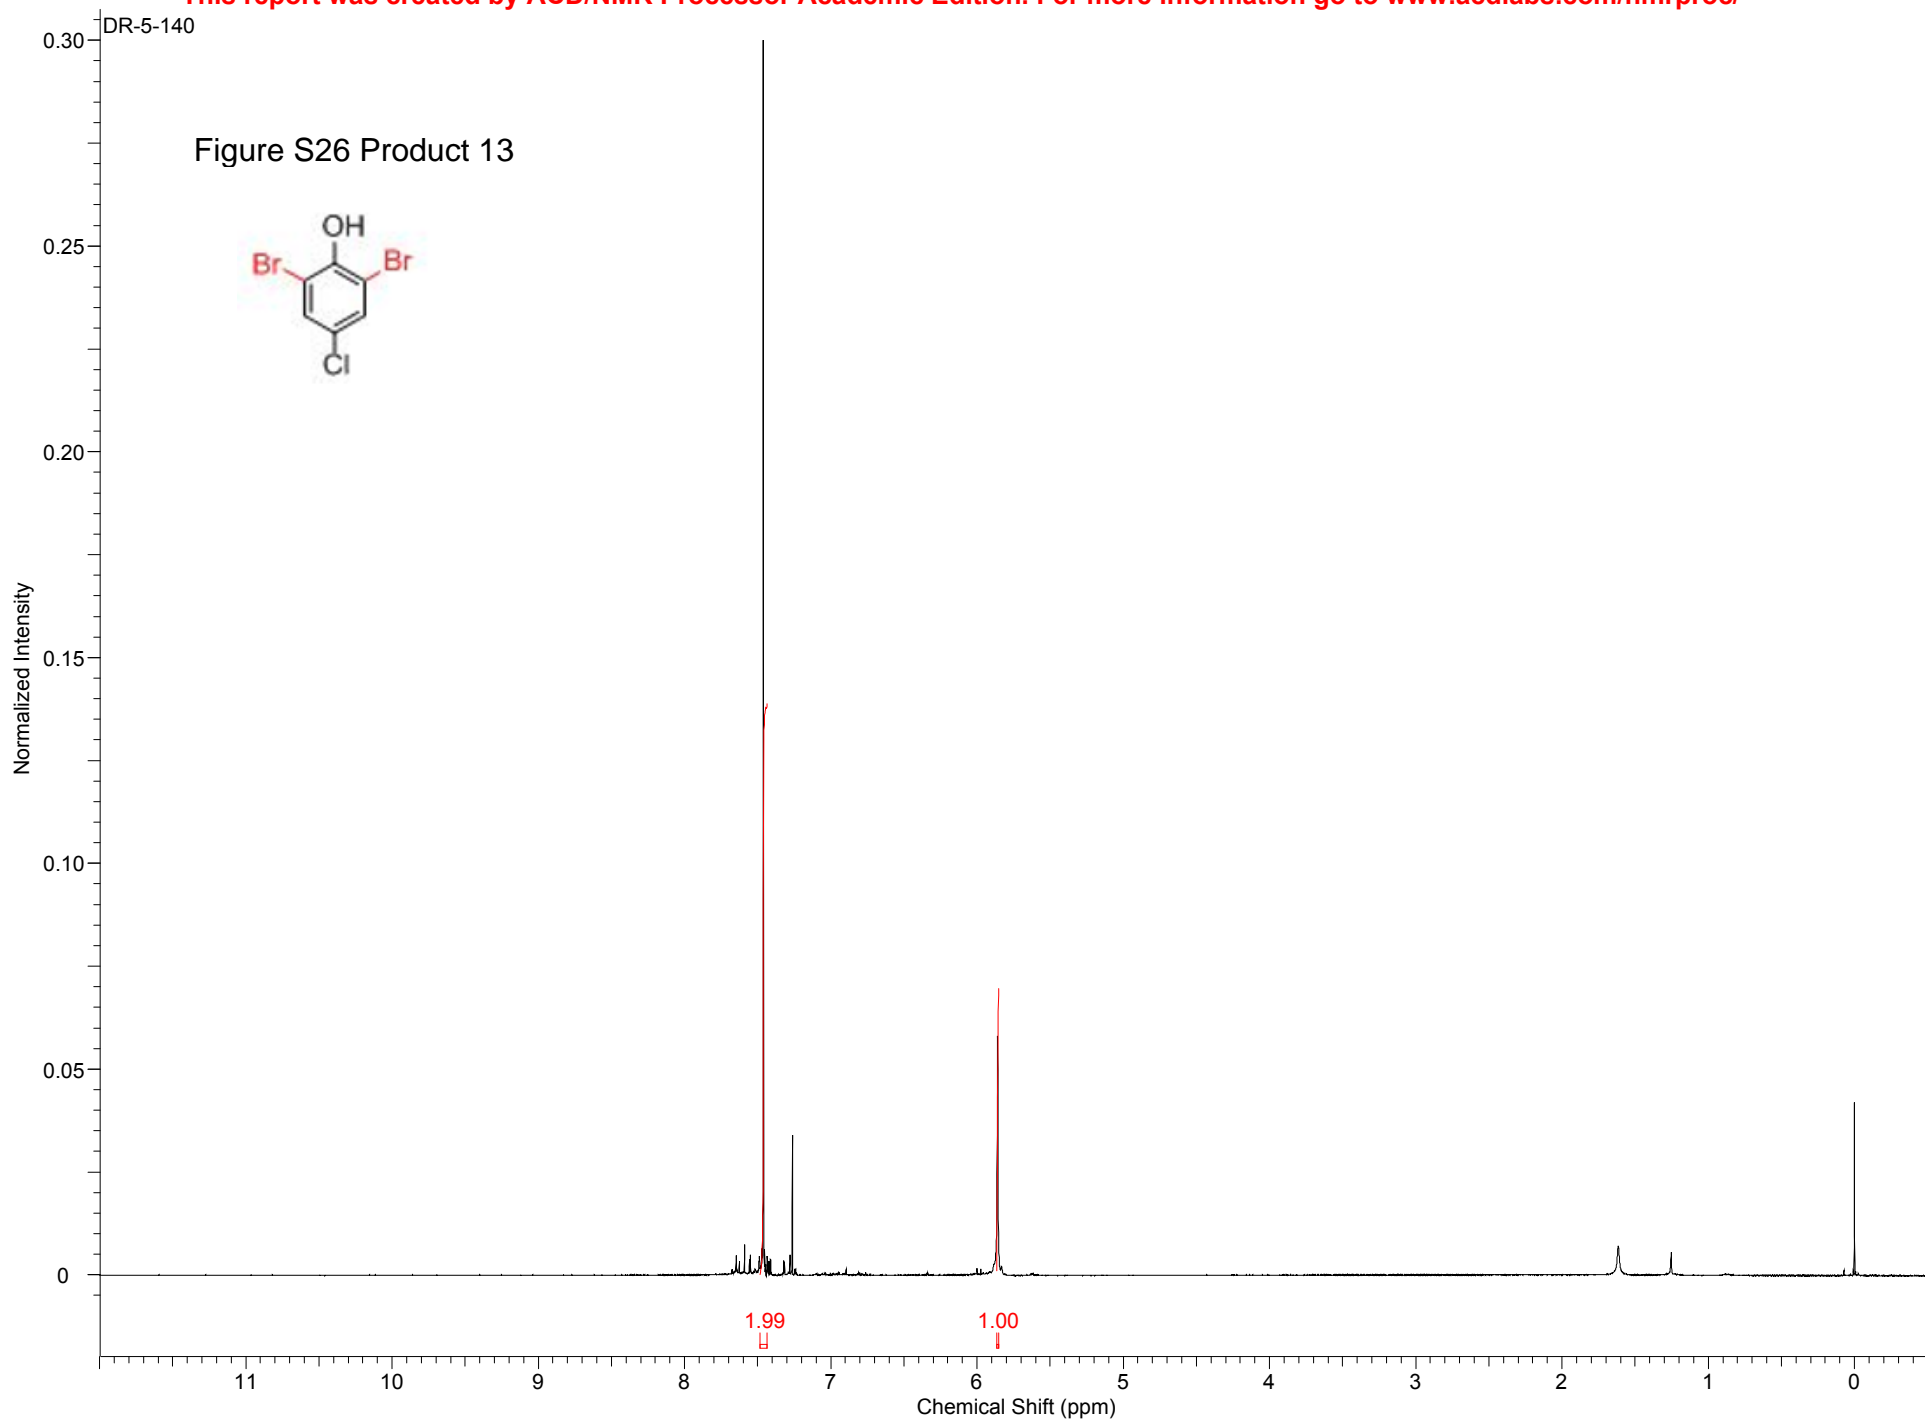

DR-5-140-13C-5000scans

Figure S27 - Product 13

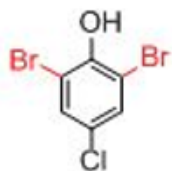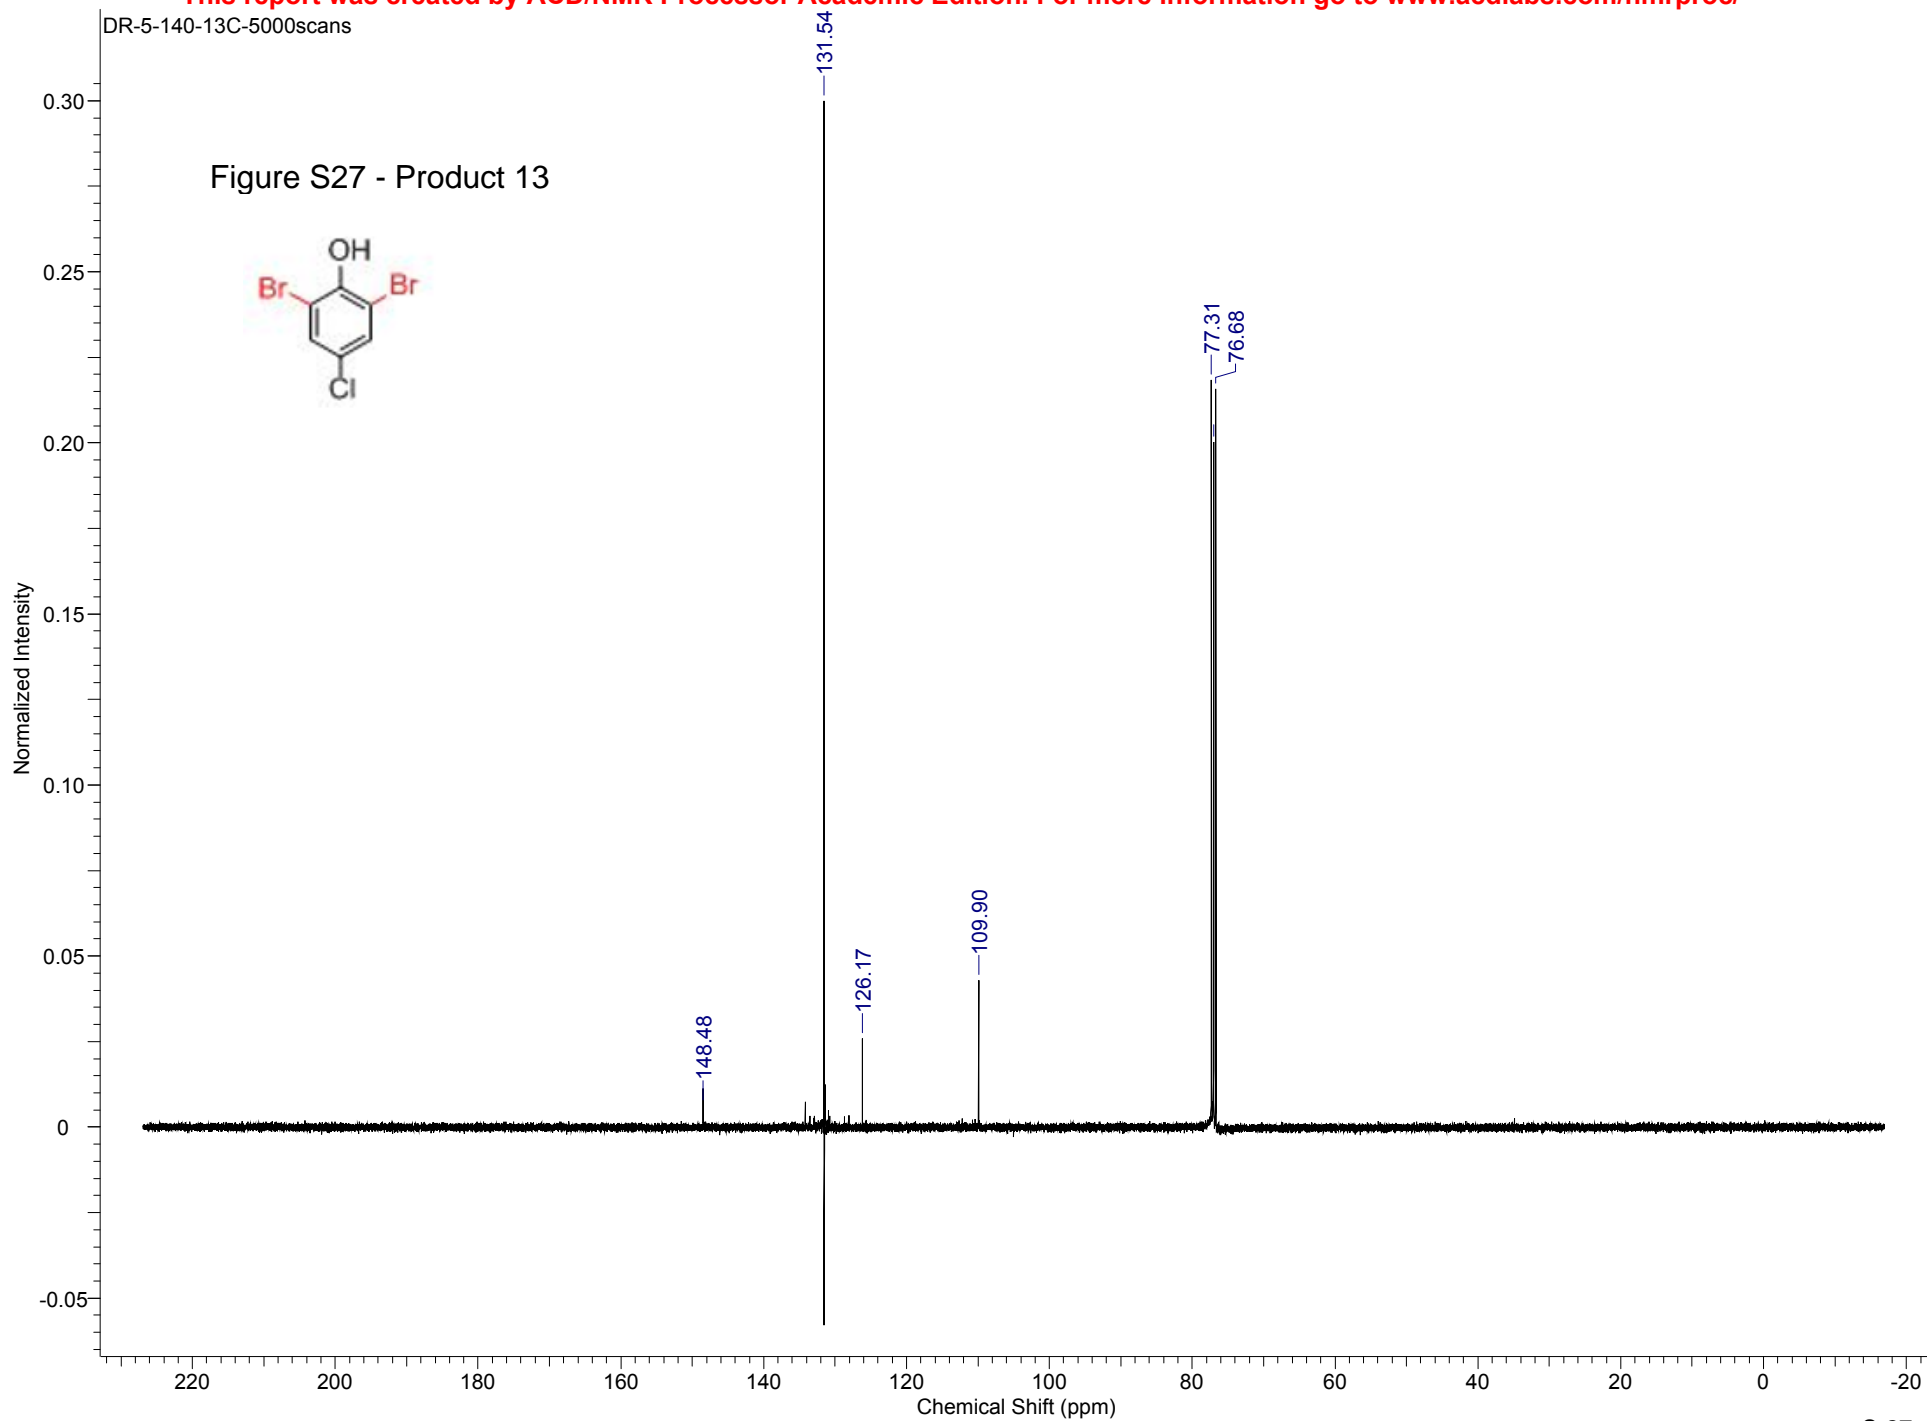

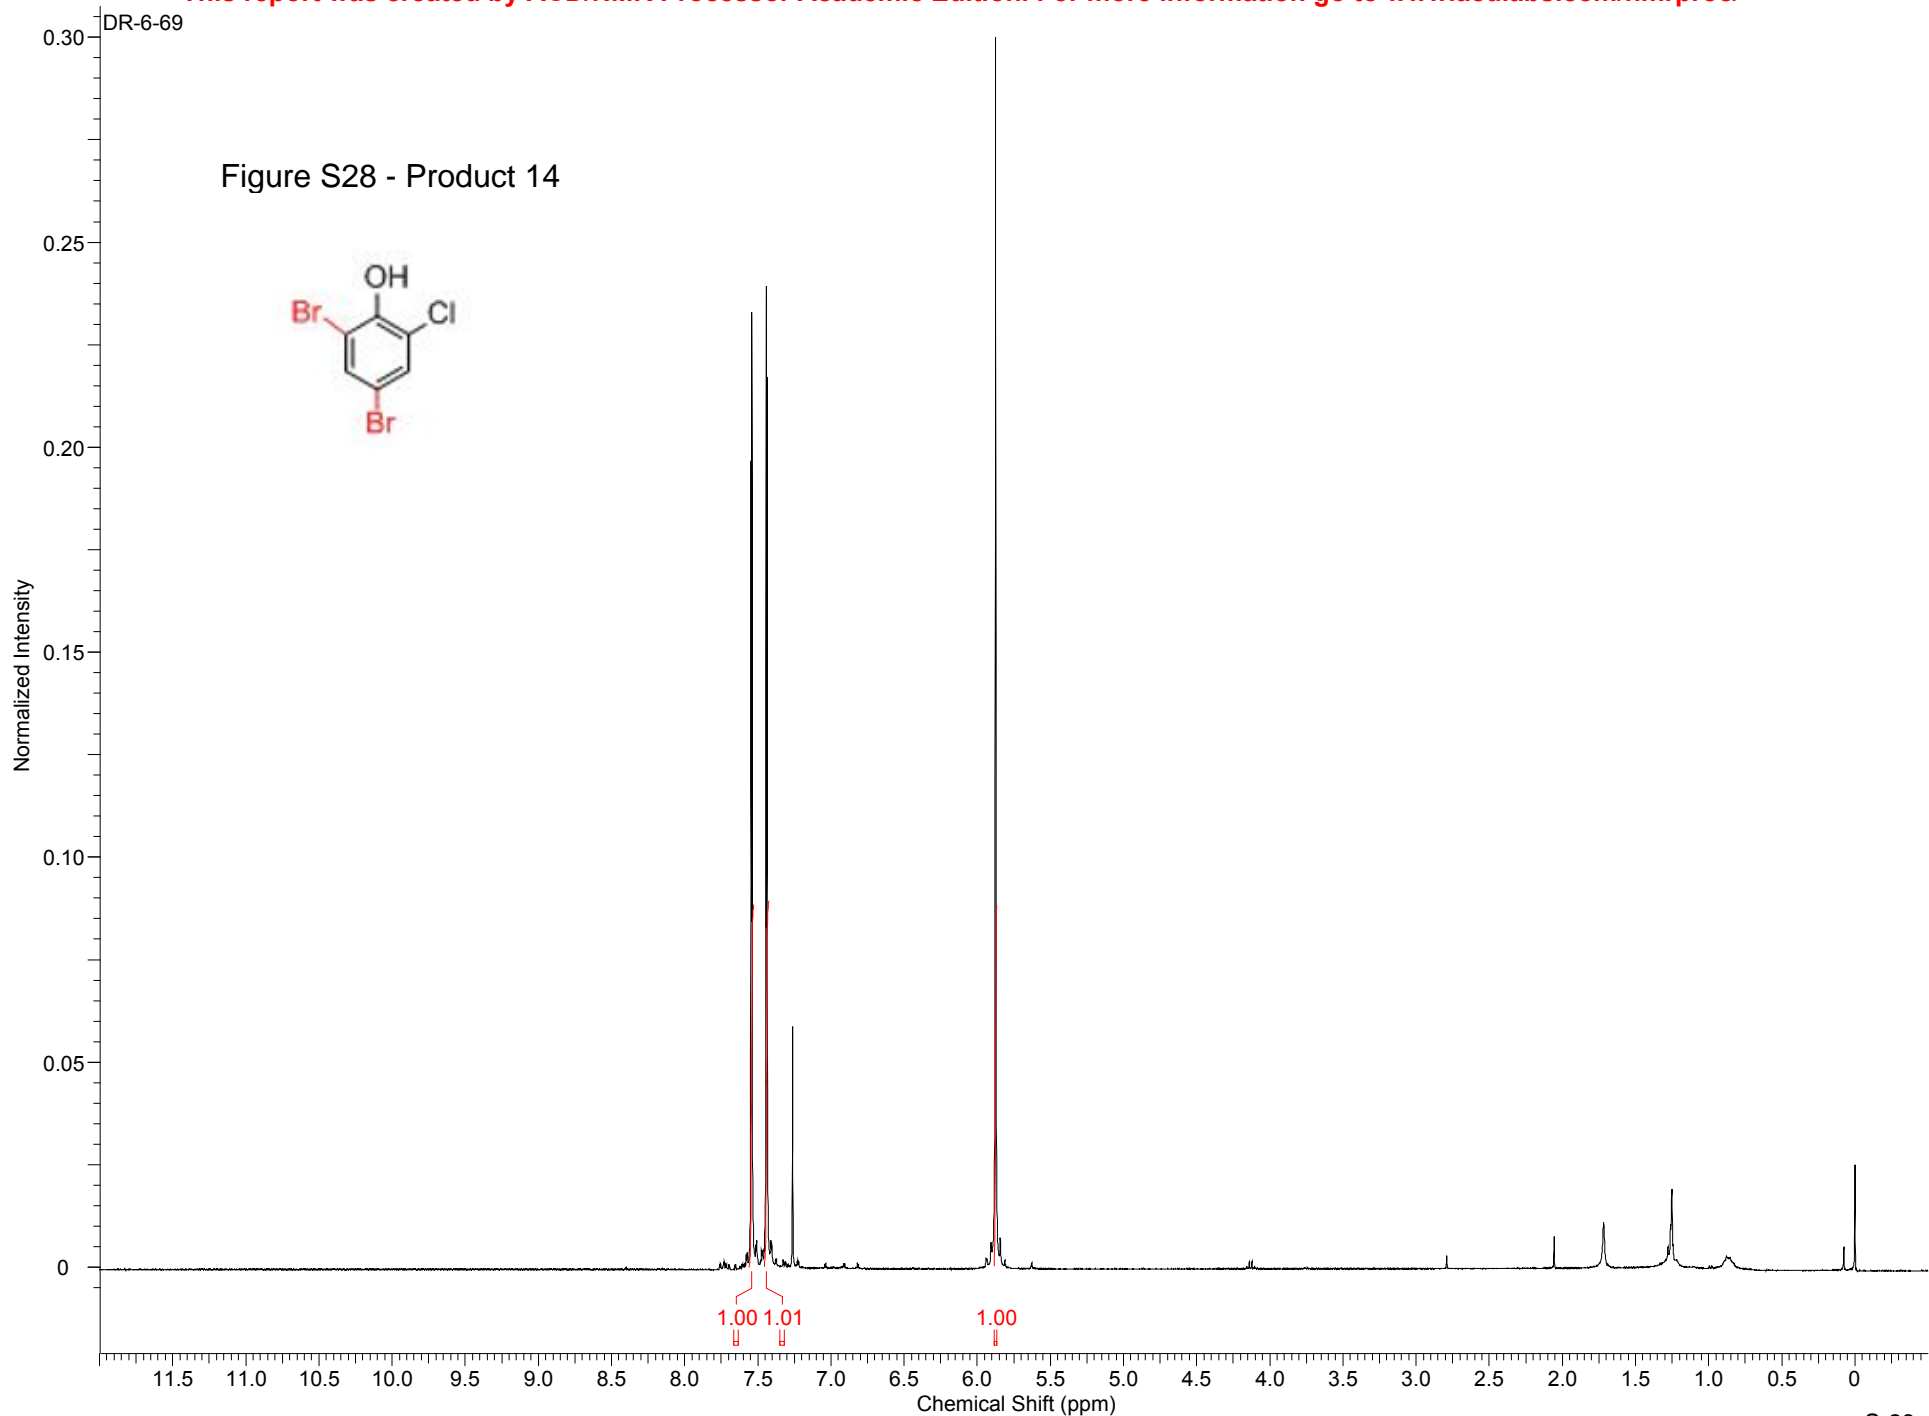

DR-6-69-13C

Figure S29 - Product 14

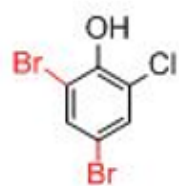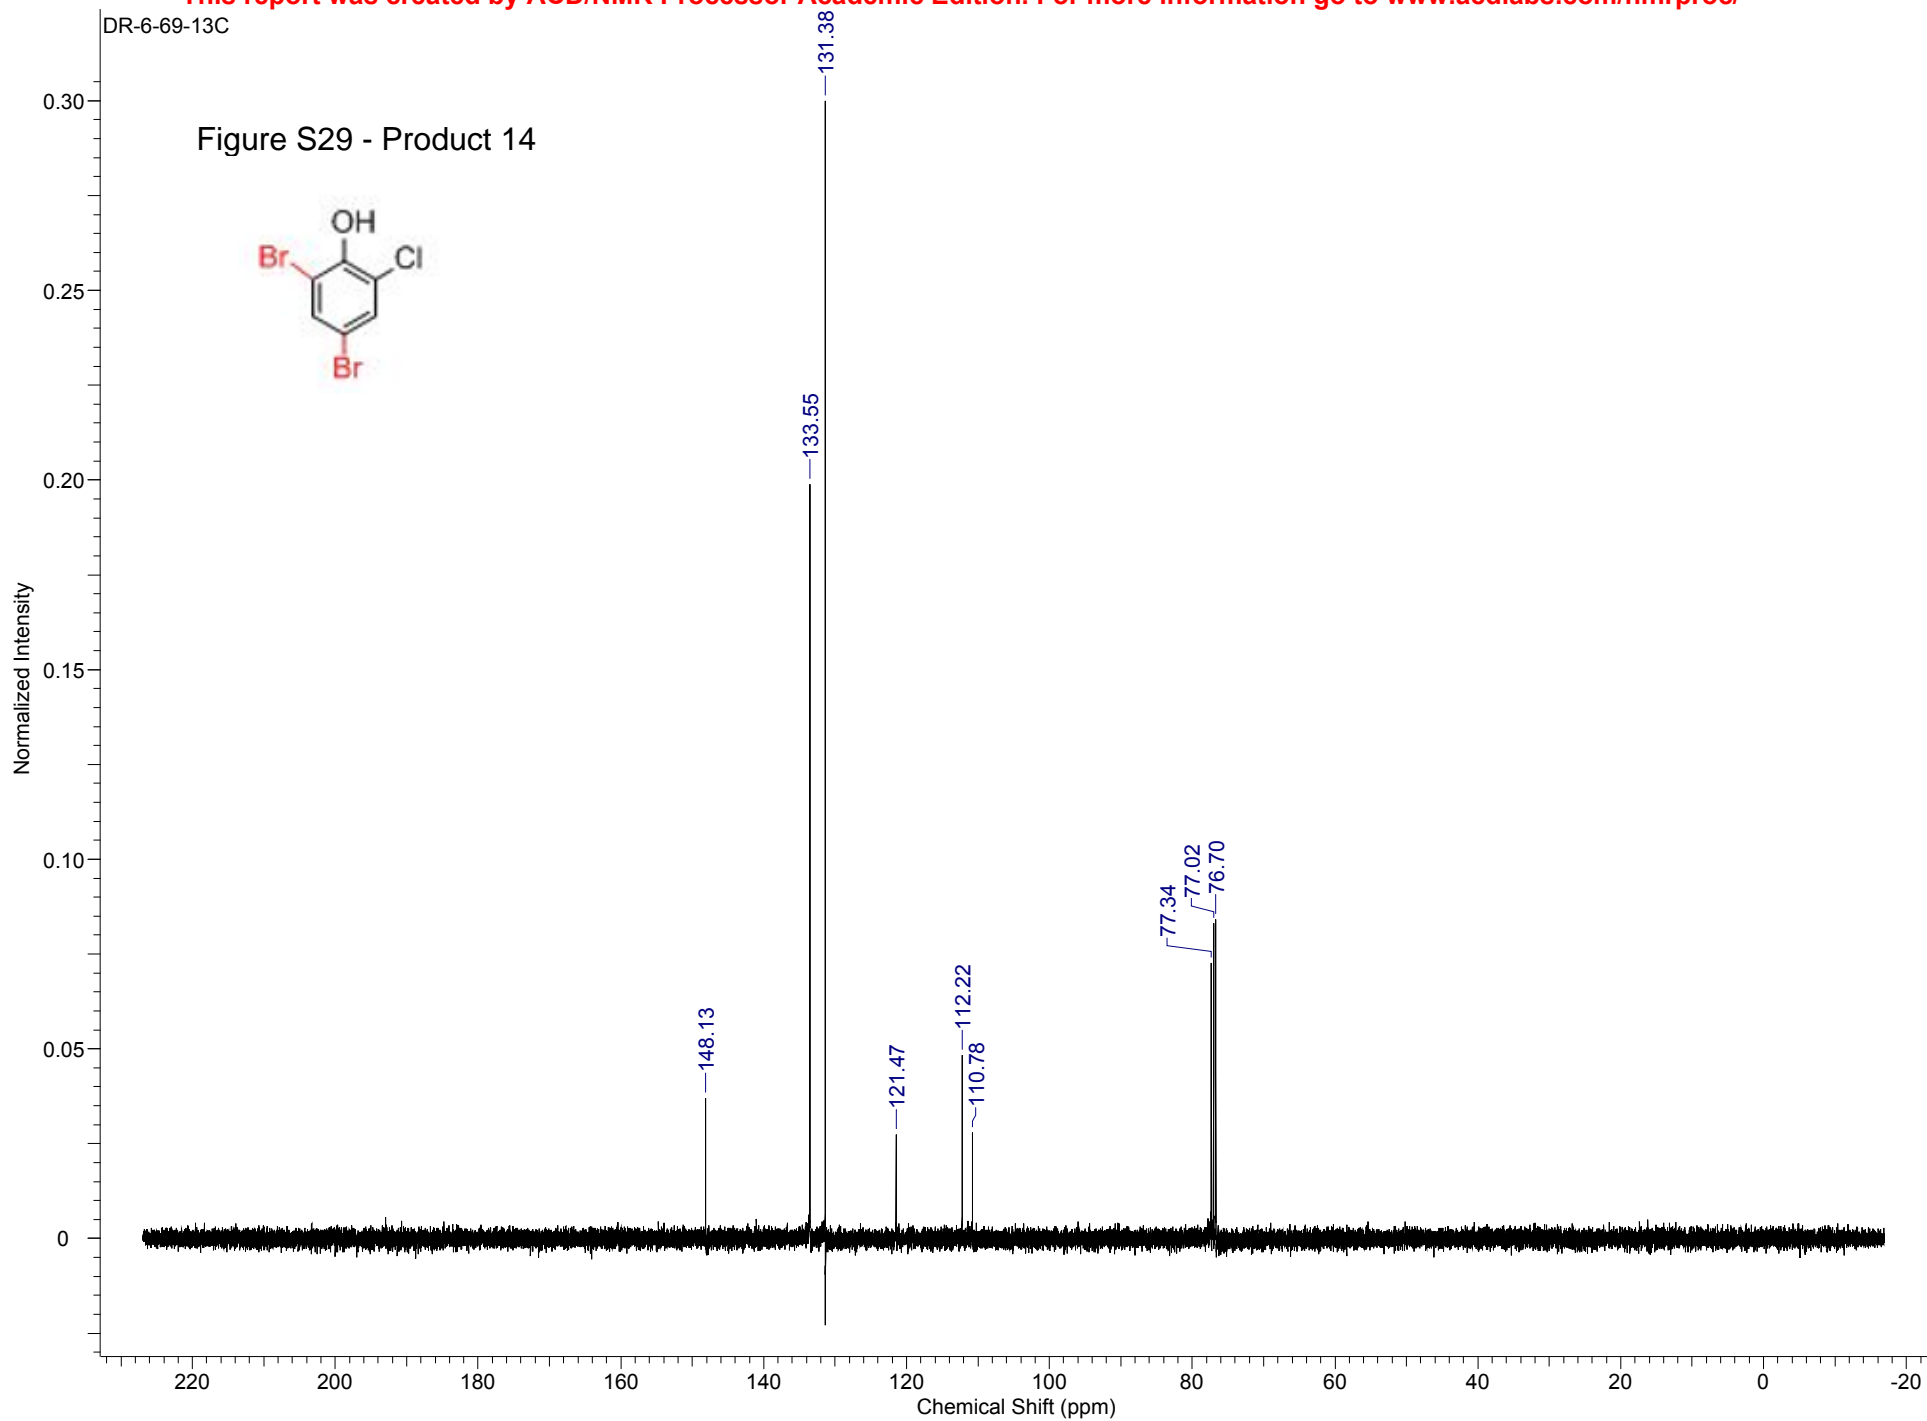

DR-5-160-F26-41-1H

Figure S30 - Product 15

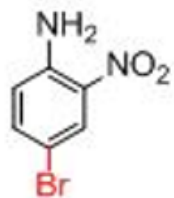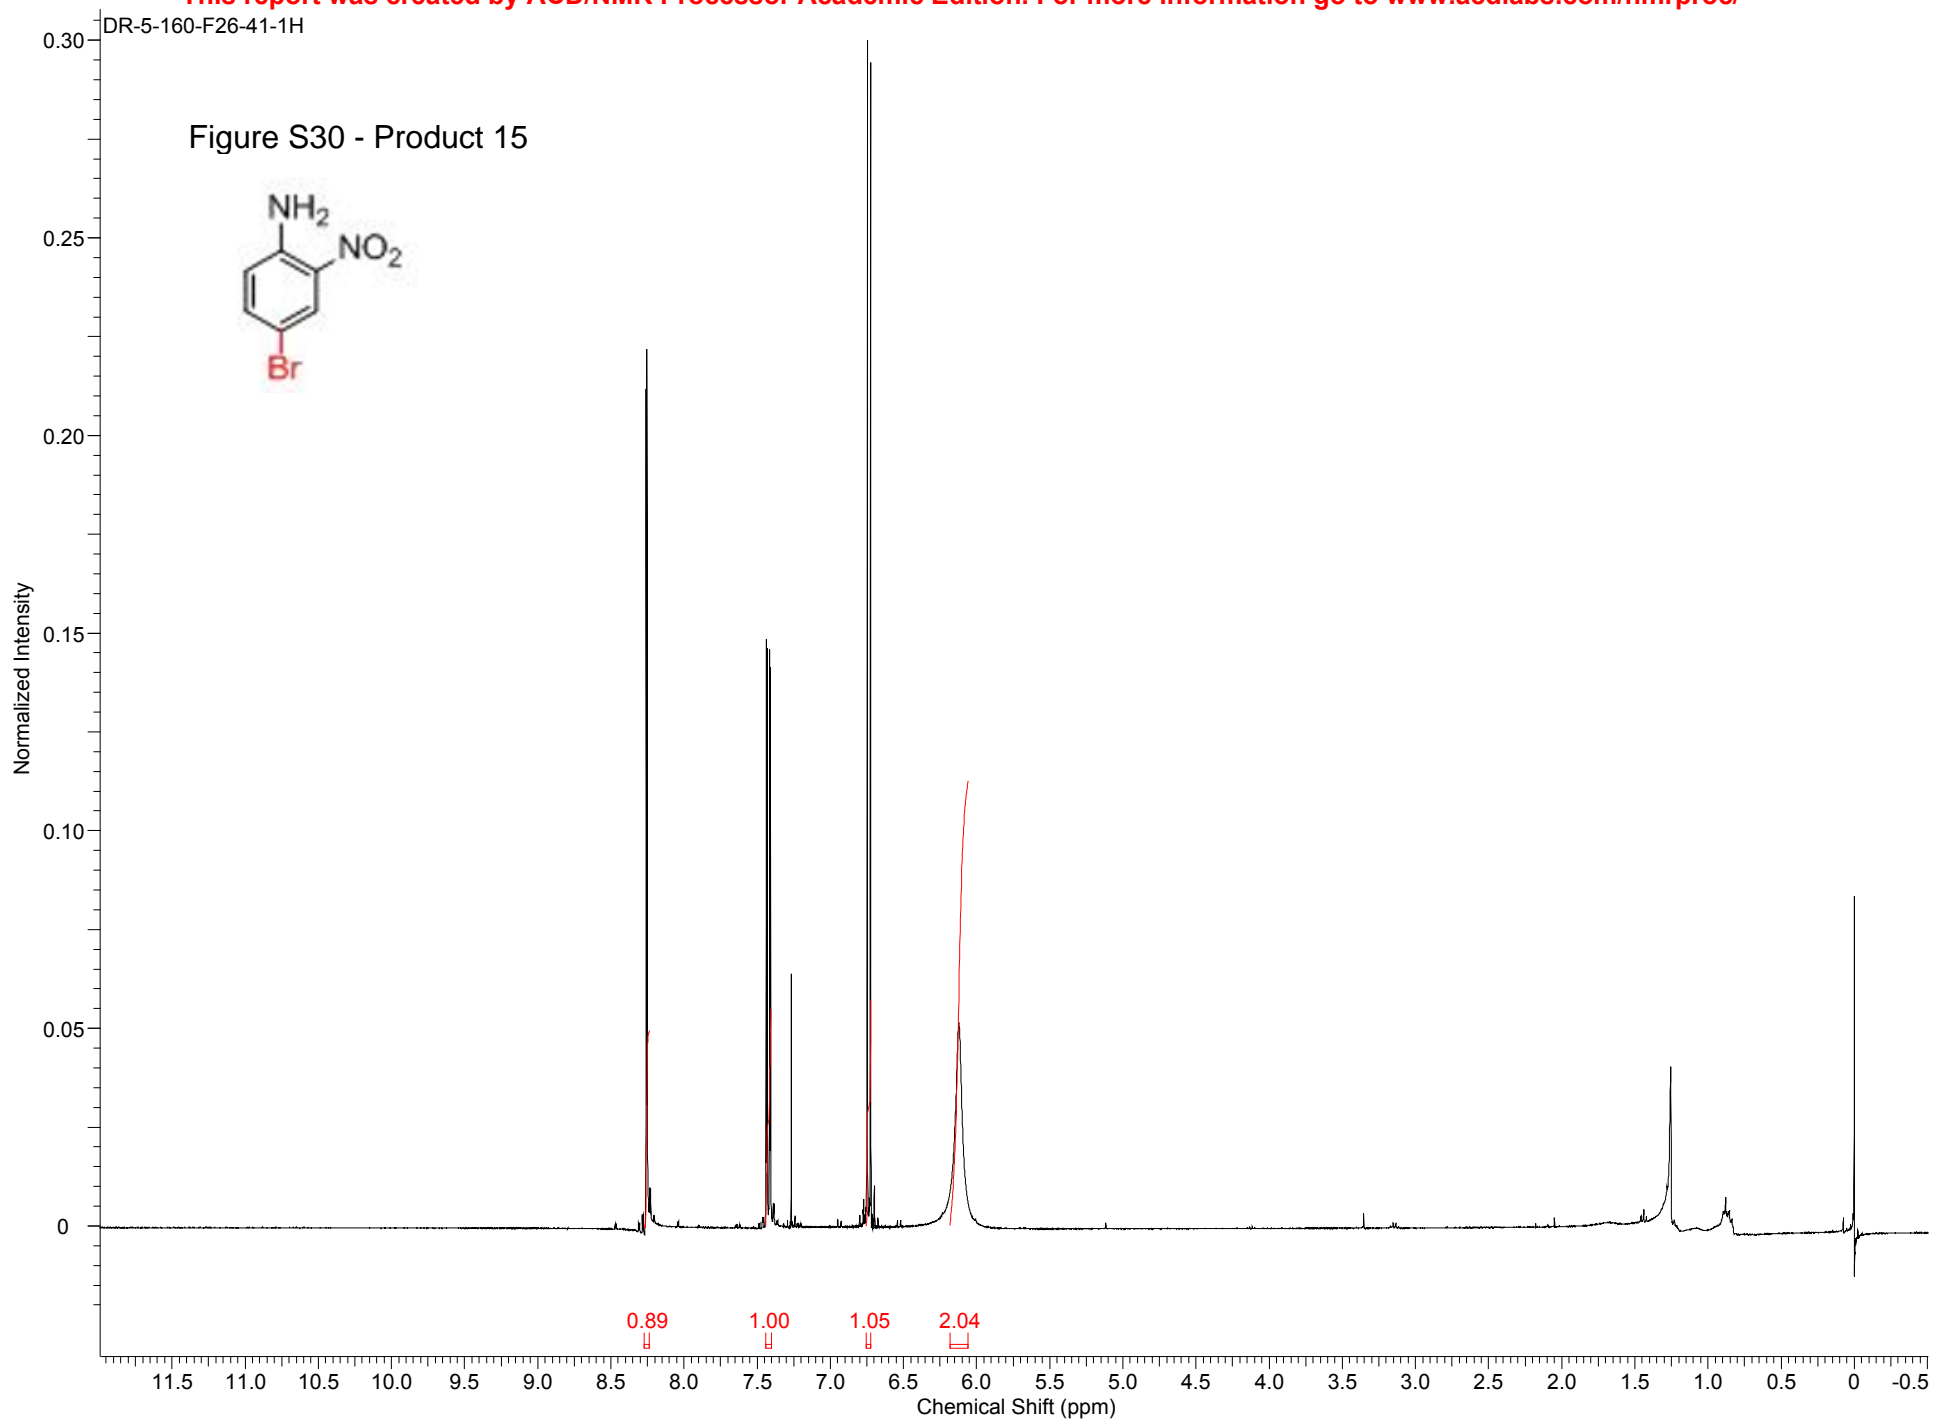

DR-5-160-13C

Figure S31 - Product 15

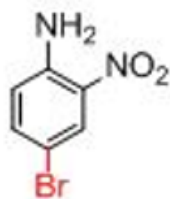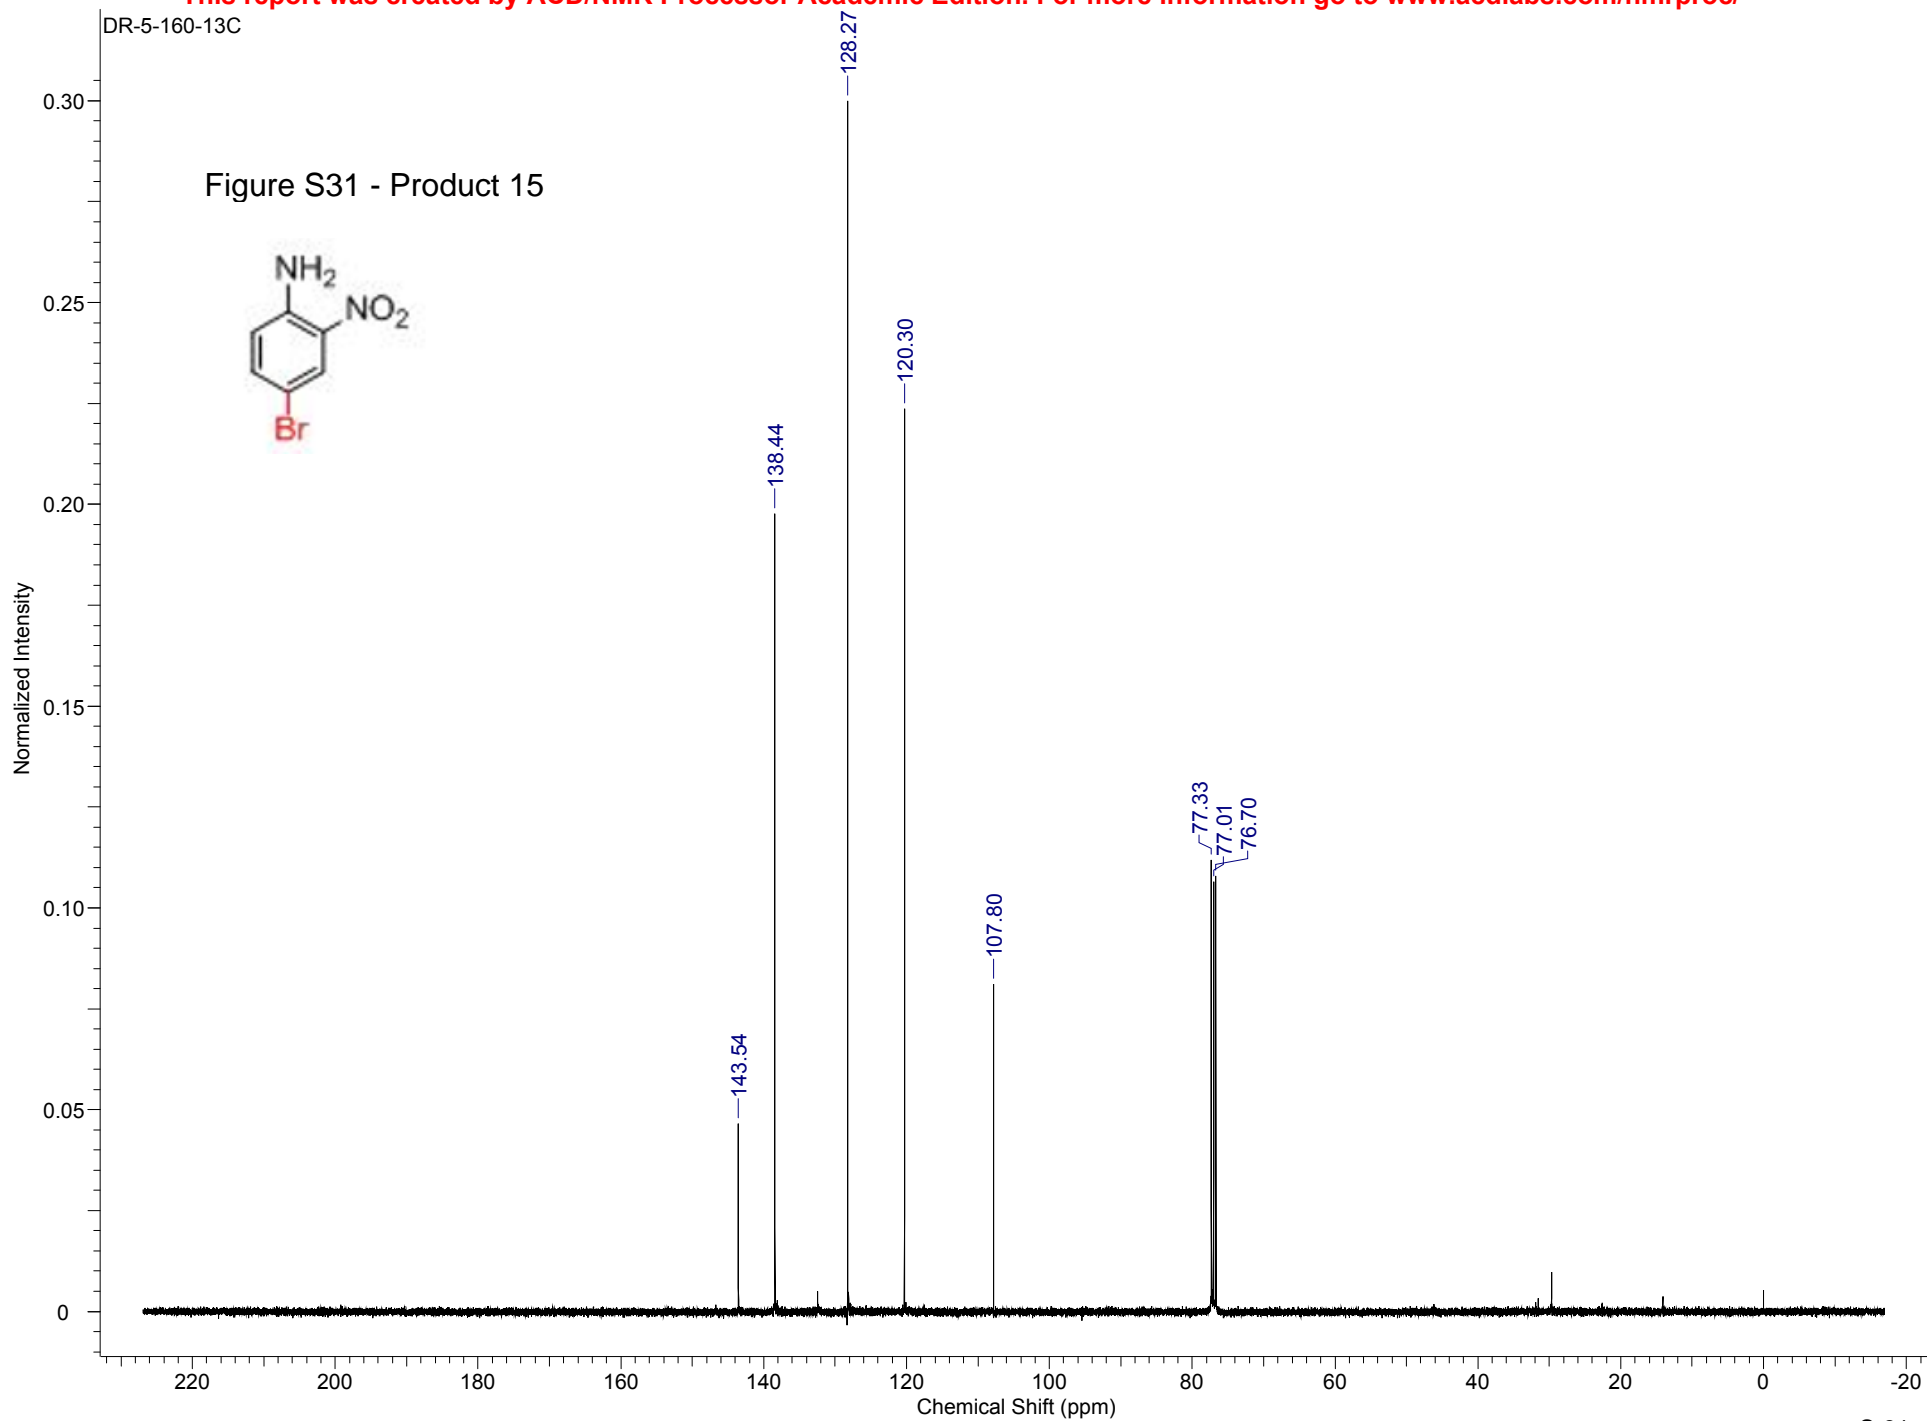

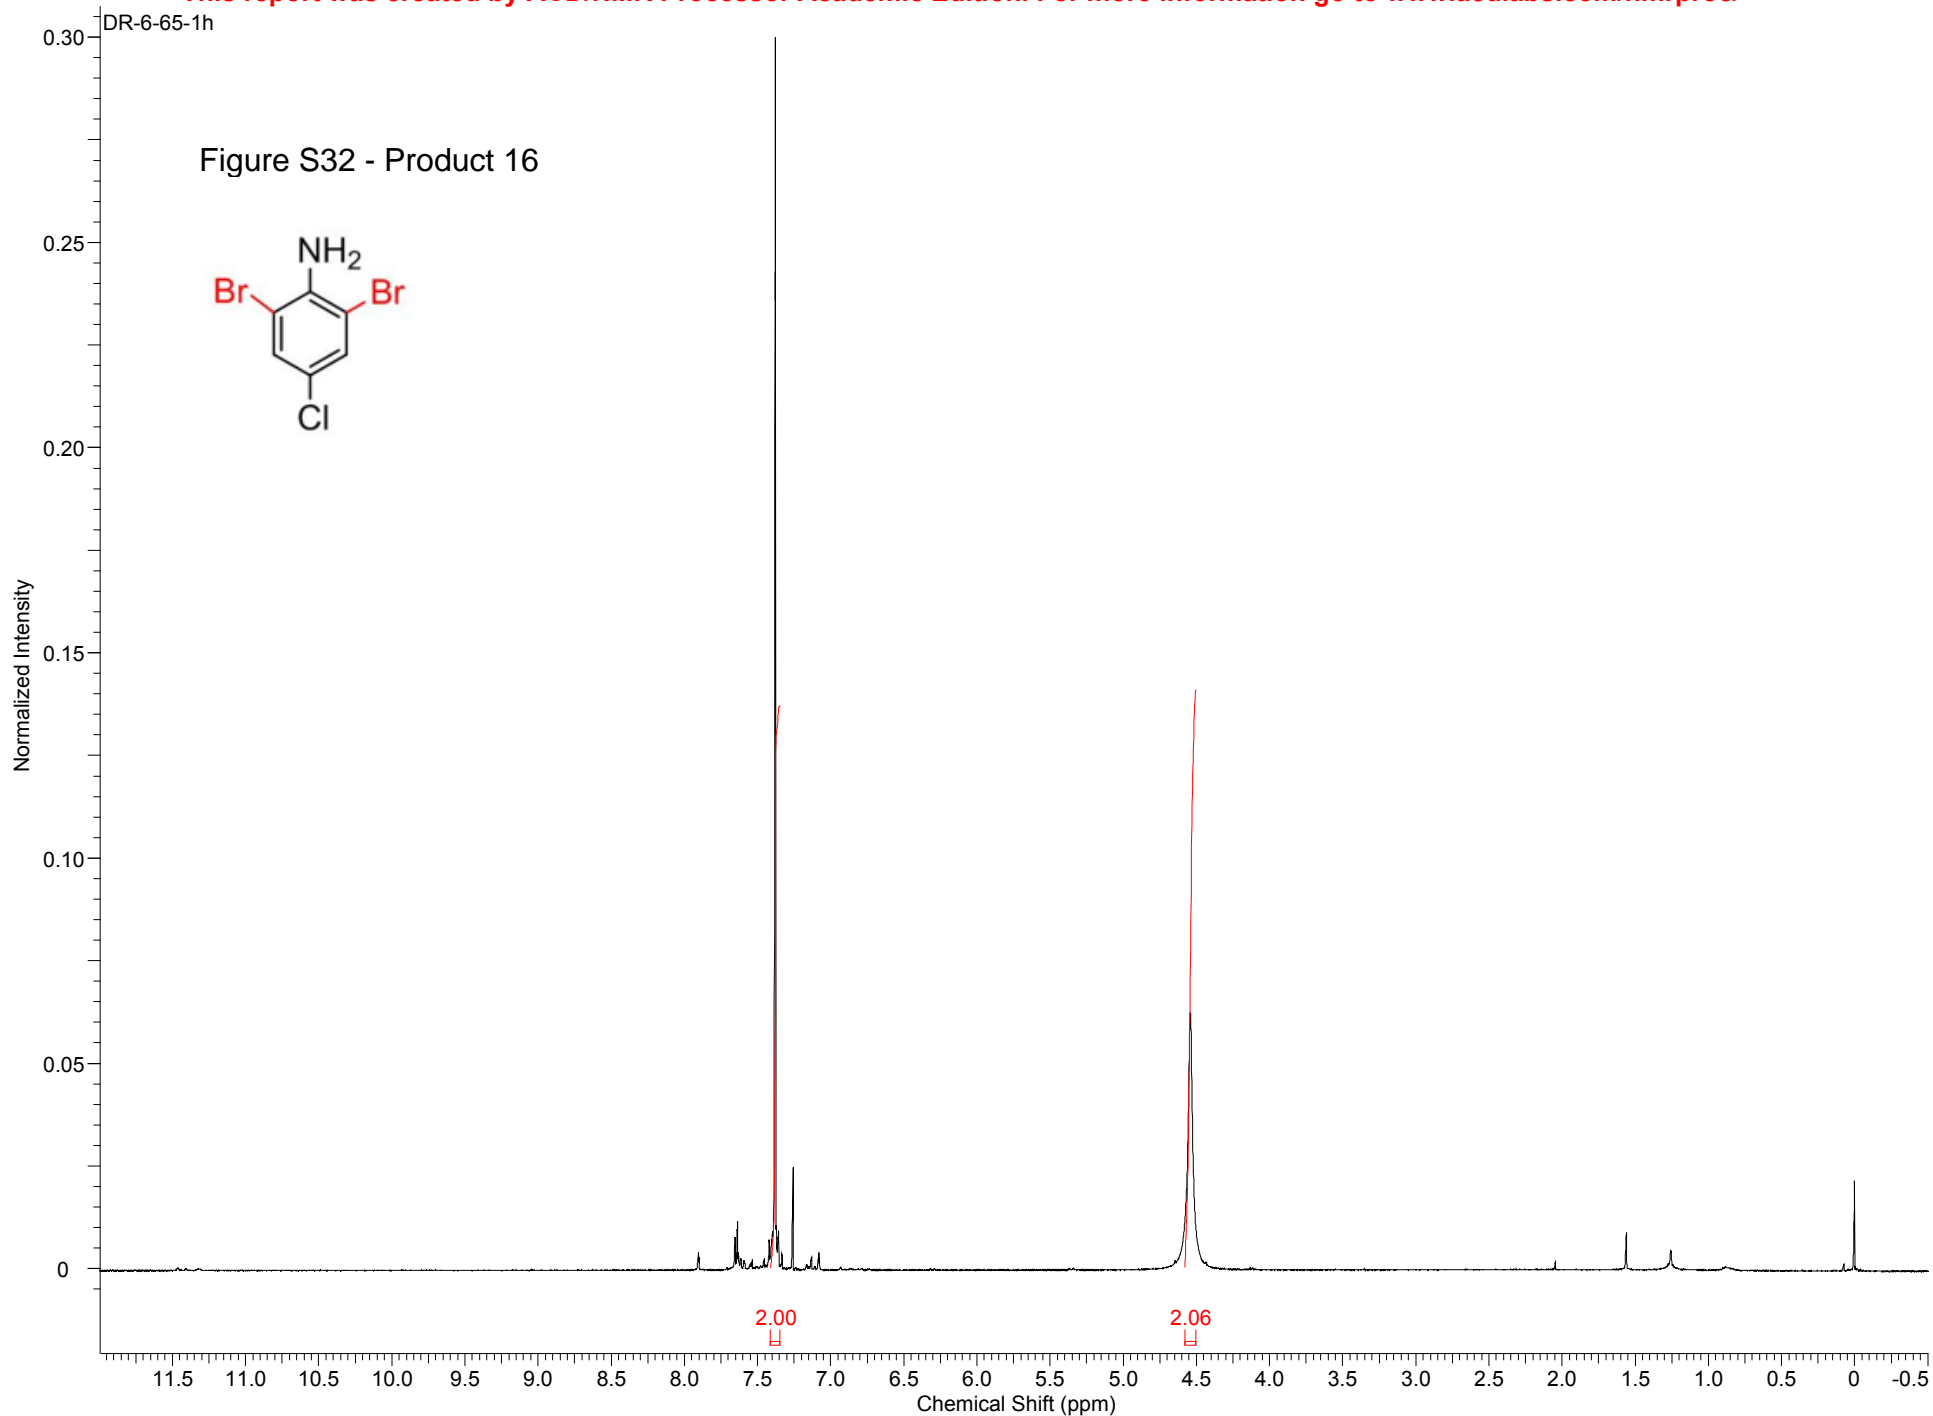



DR-6-65-5000scans-13C

Figure S33 - Product 16

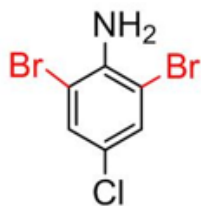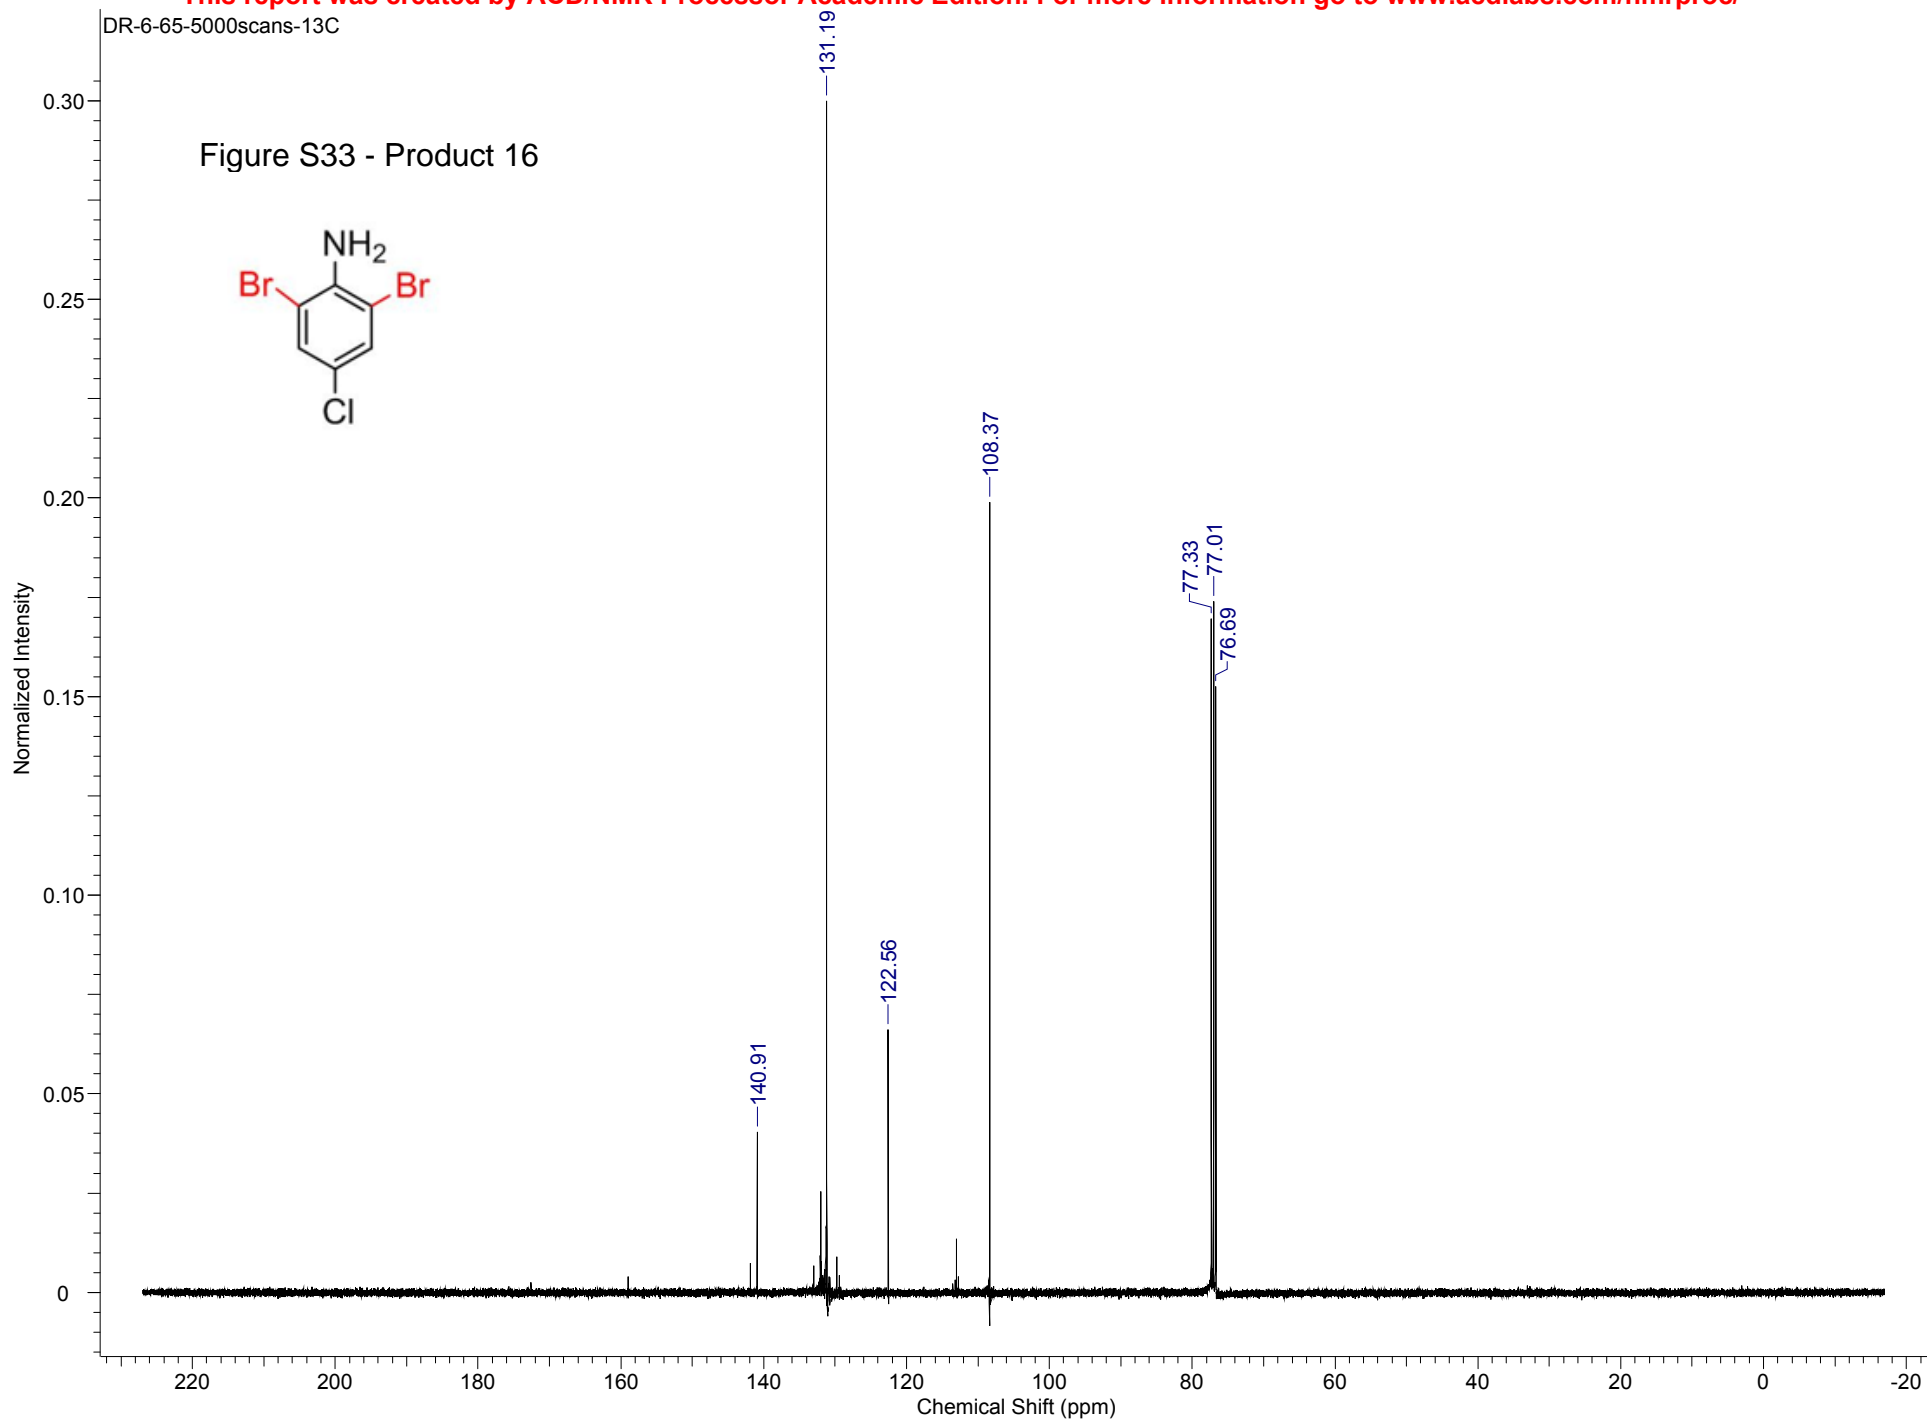

DR-6-58-F15-27-1H

Figure S34 - Product 17

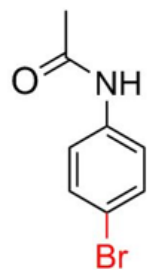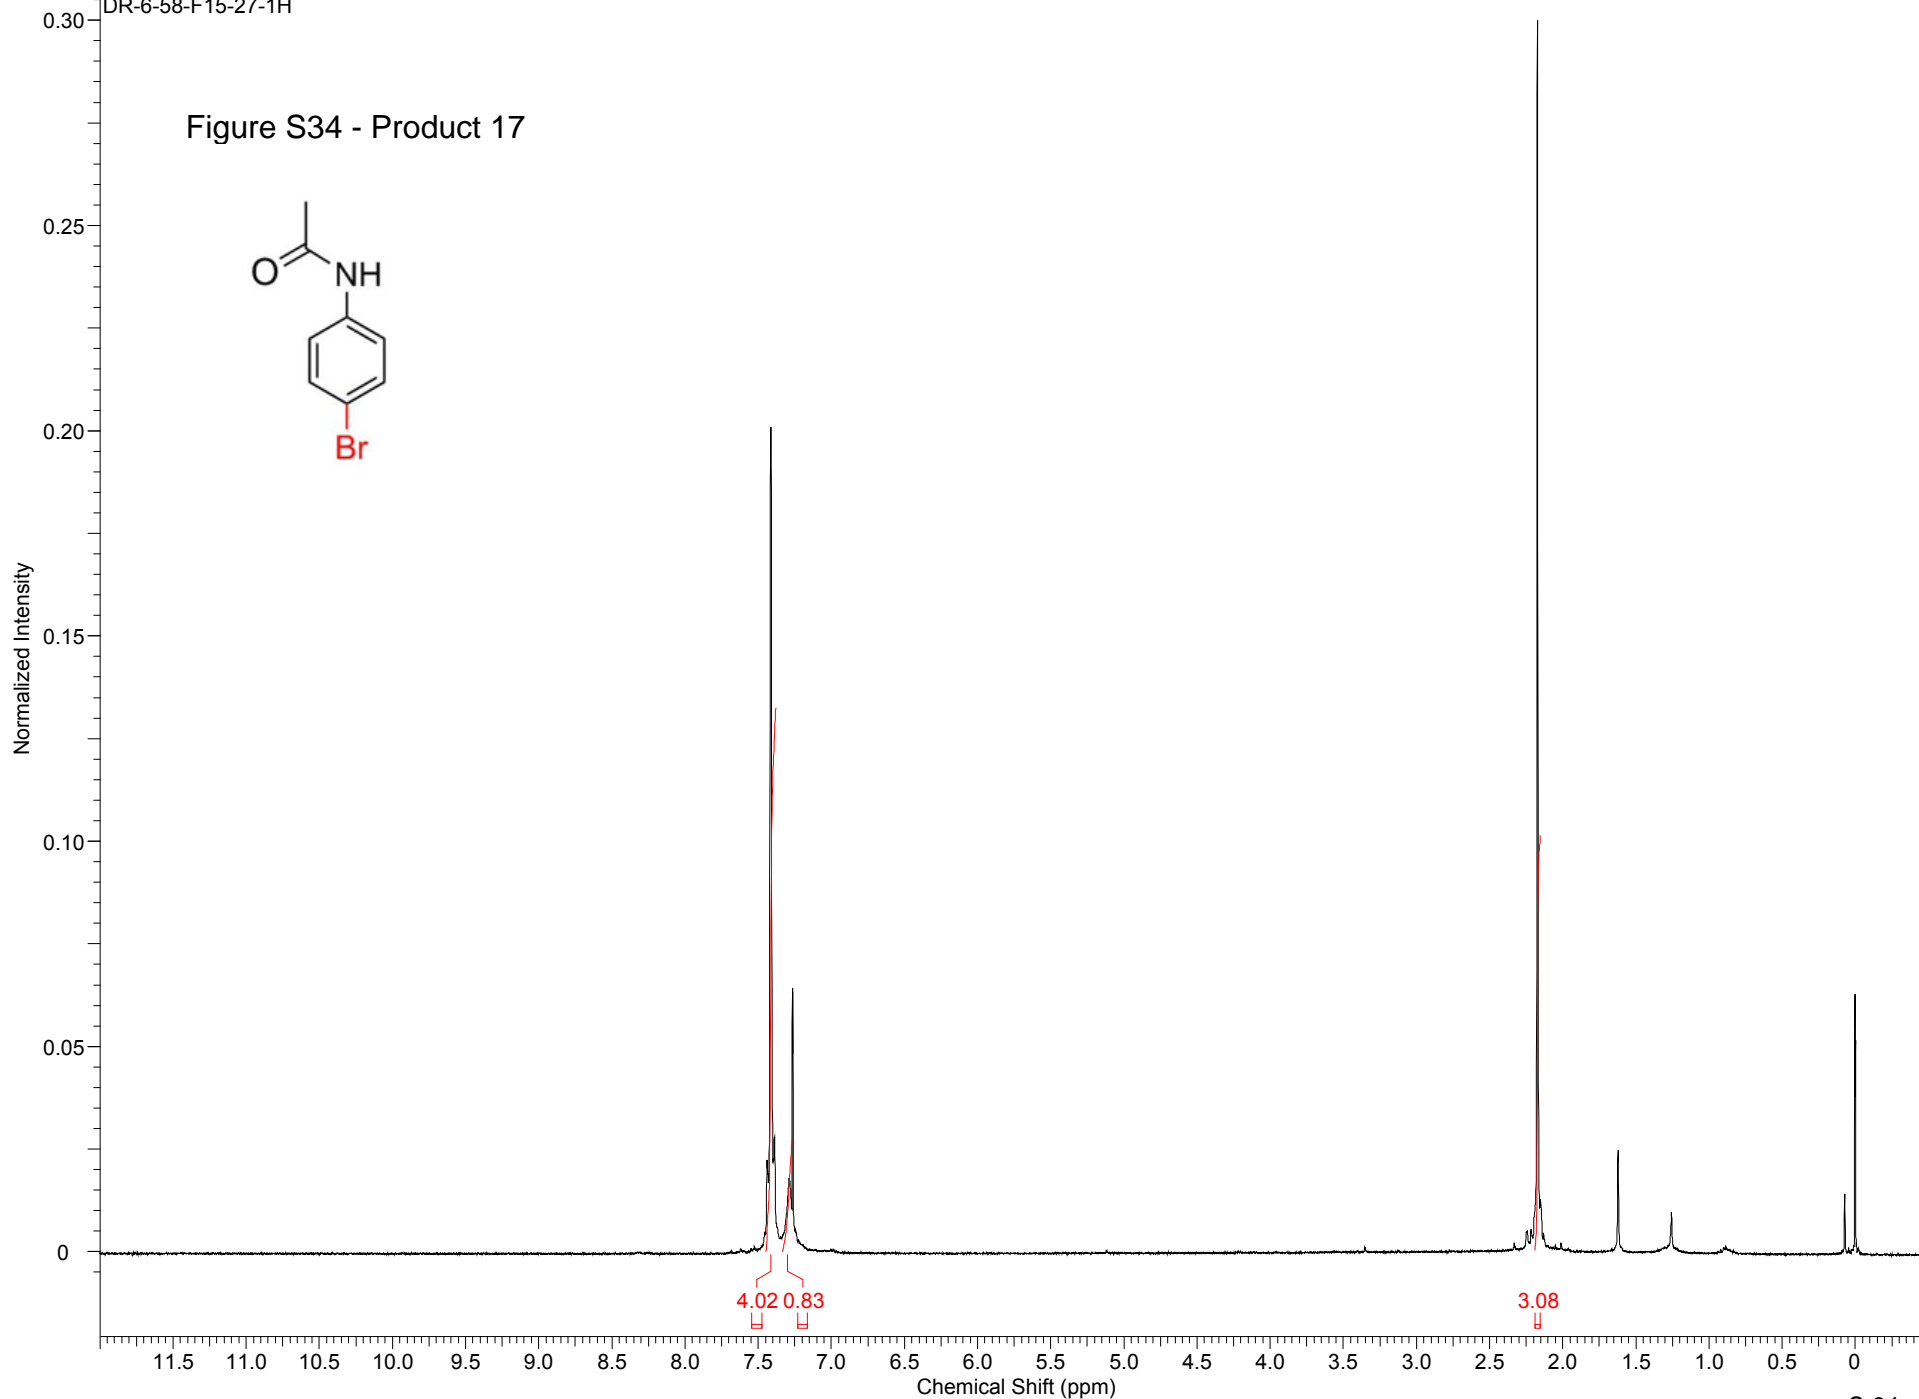

DR-6-58-13C-6000scans

Figure S35 - Product 17

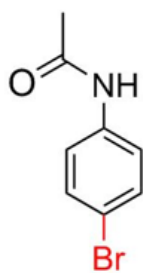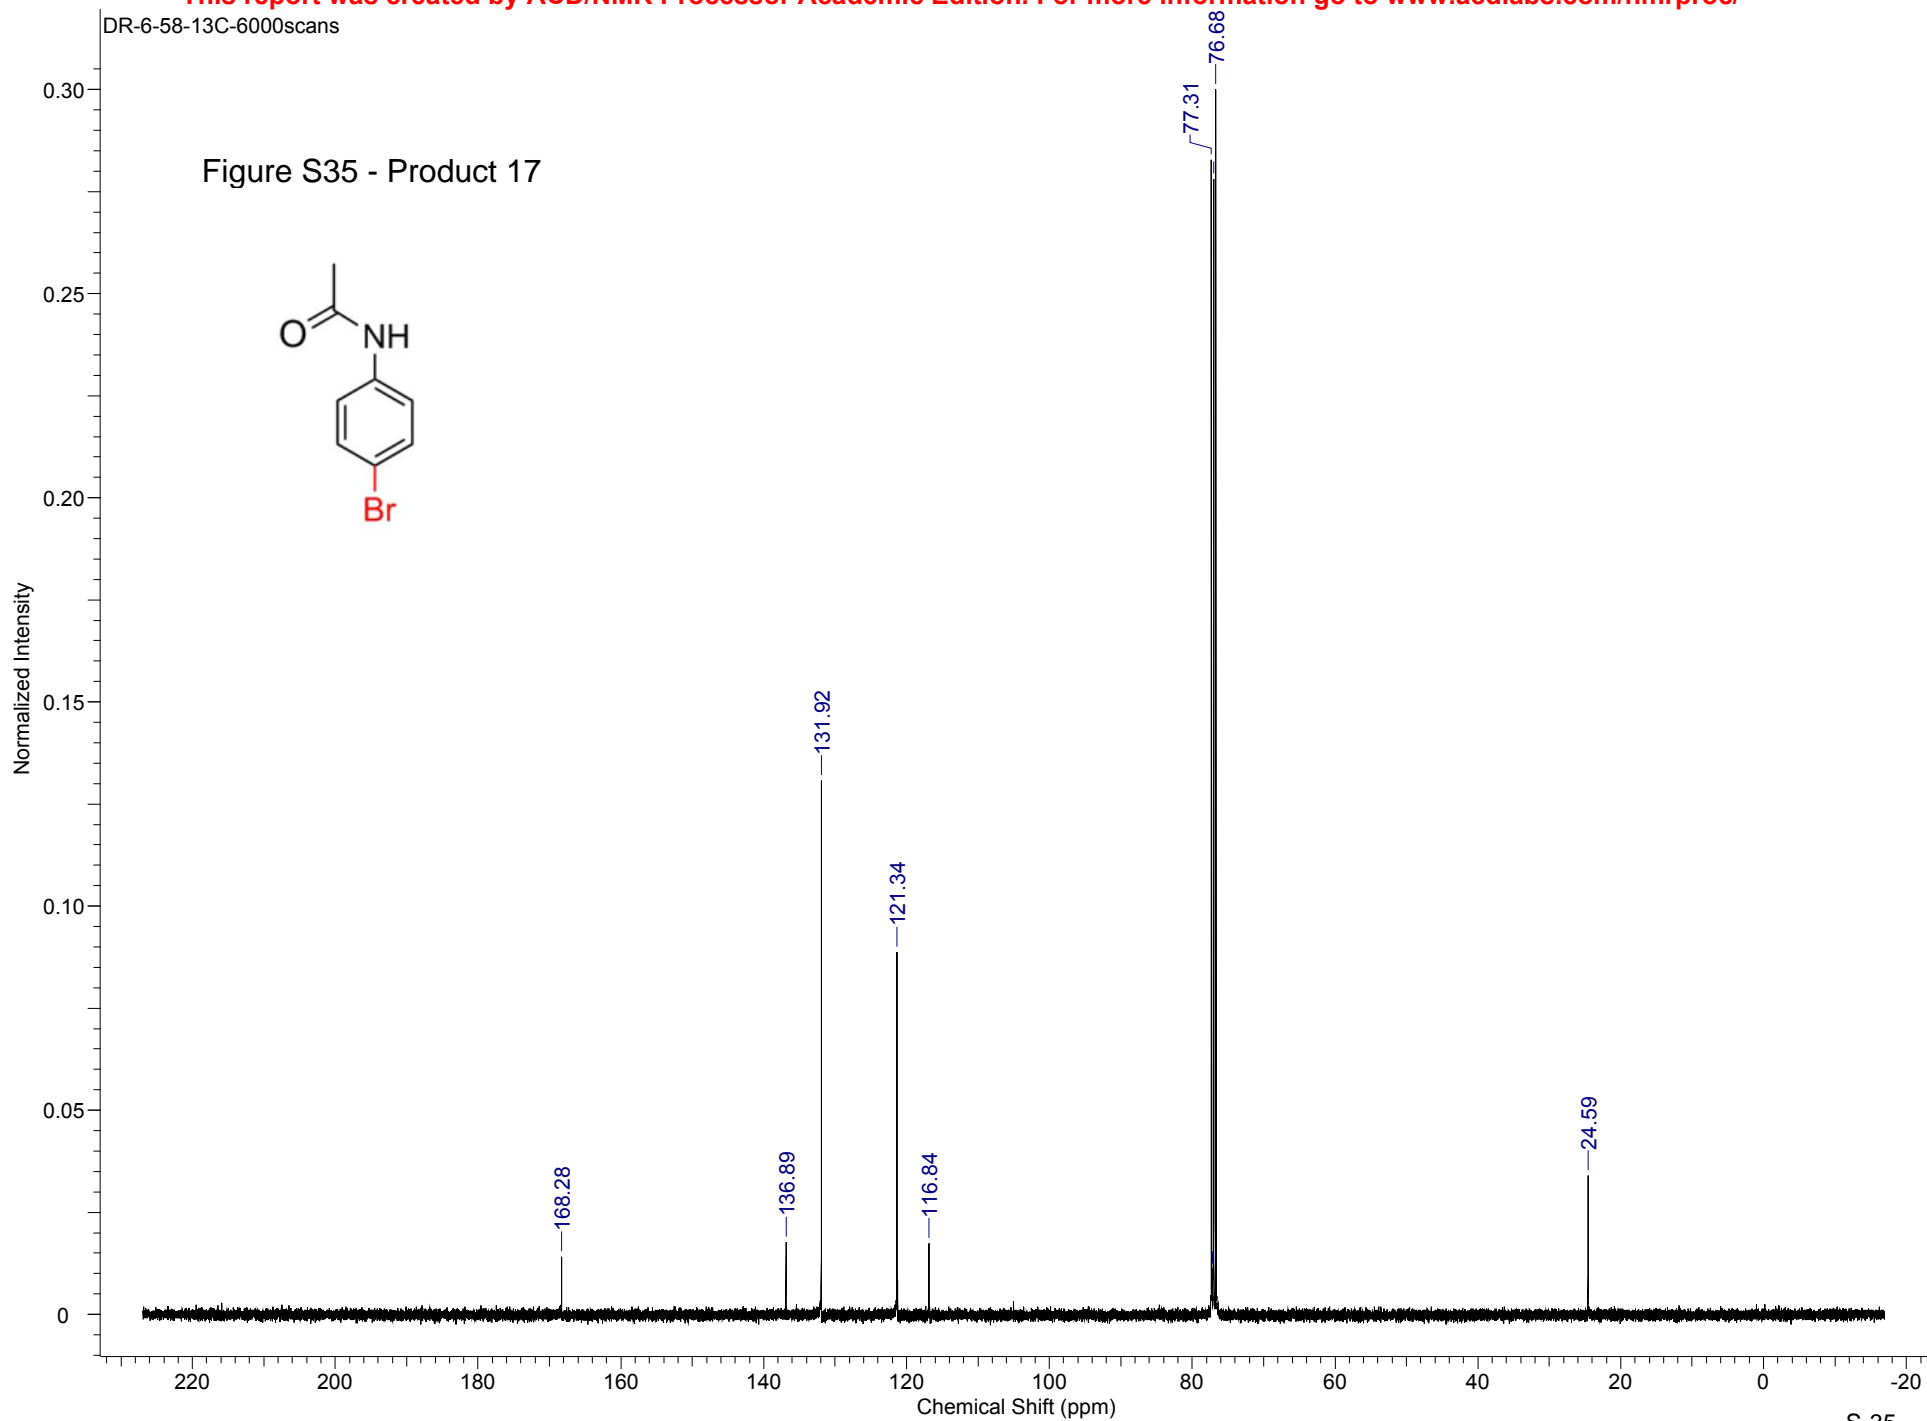

DR-6-29-1H-F7-18

Figure S36 - Product 18

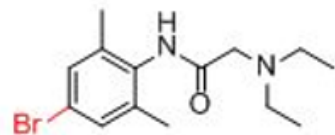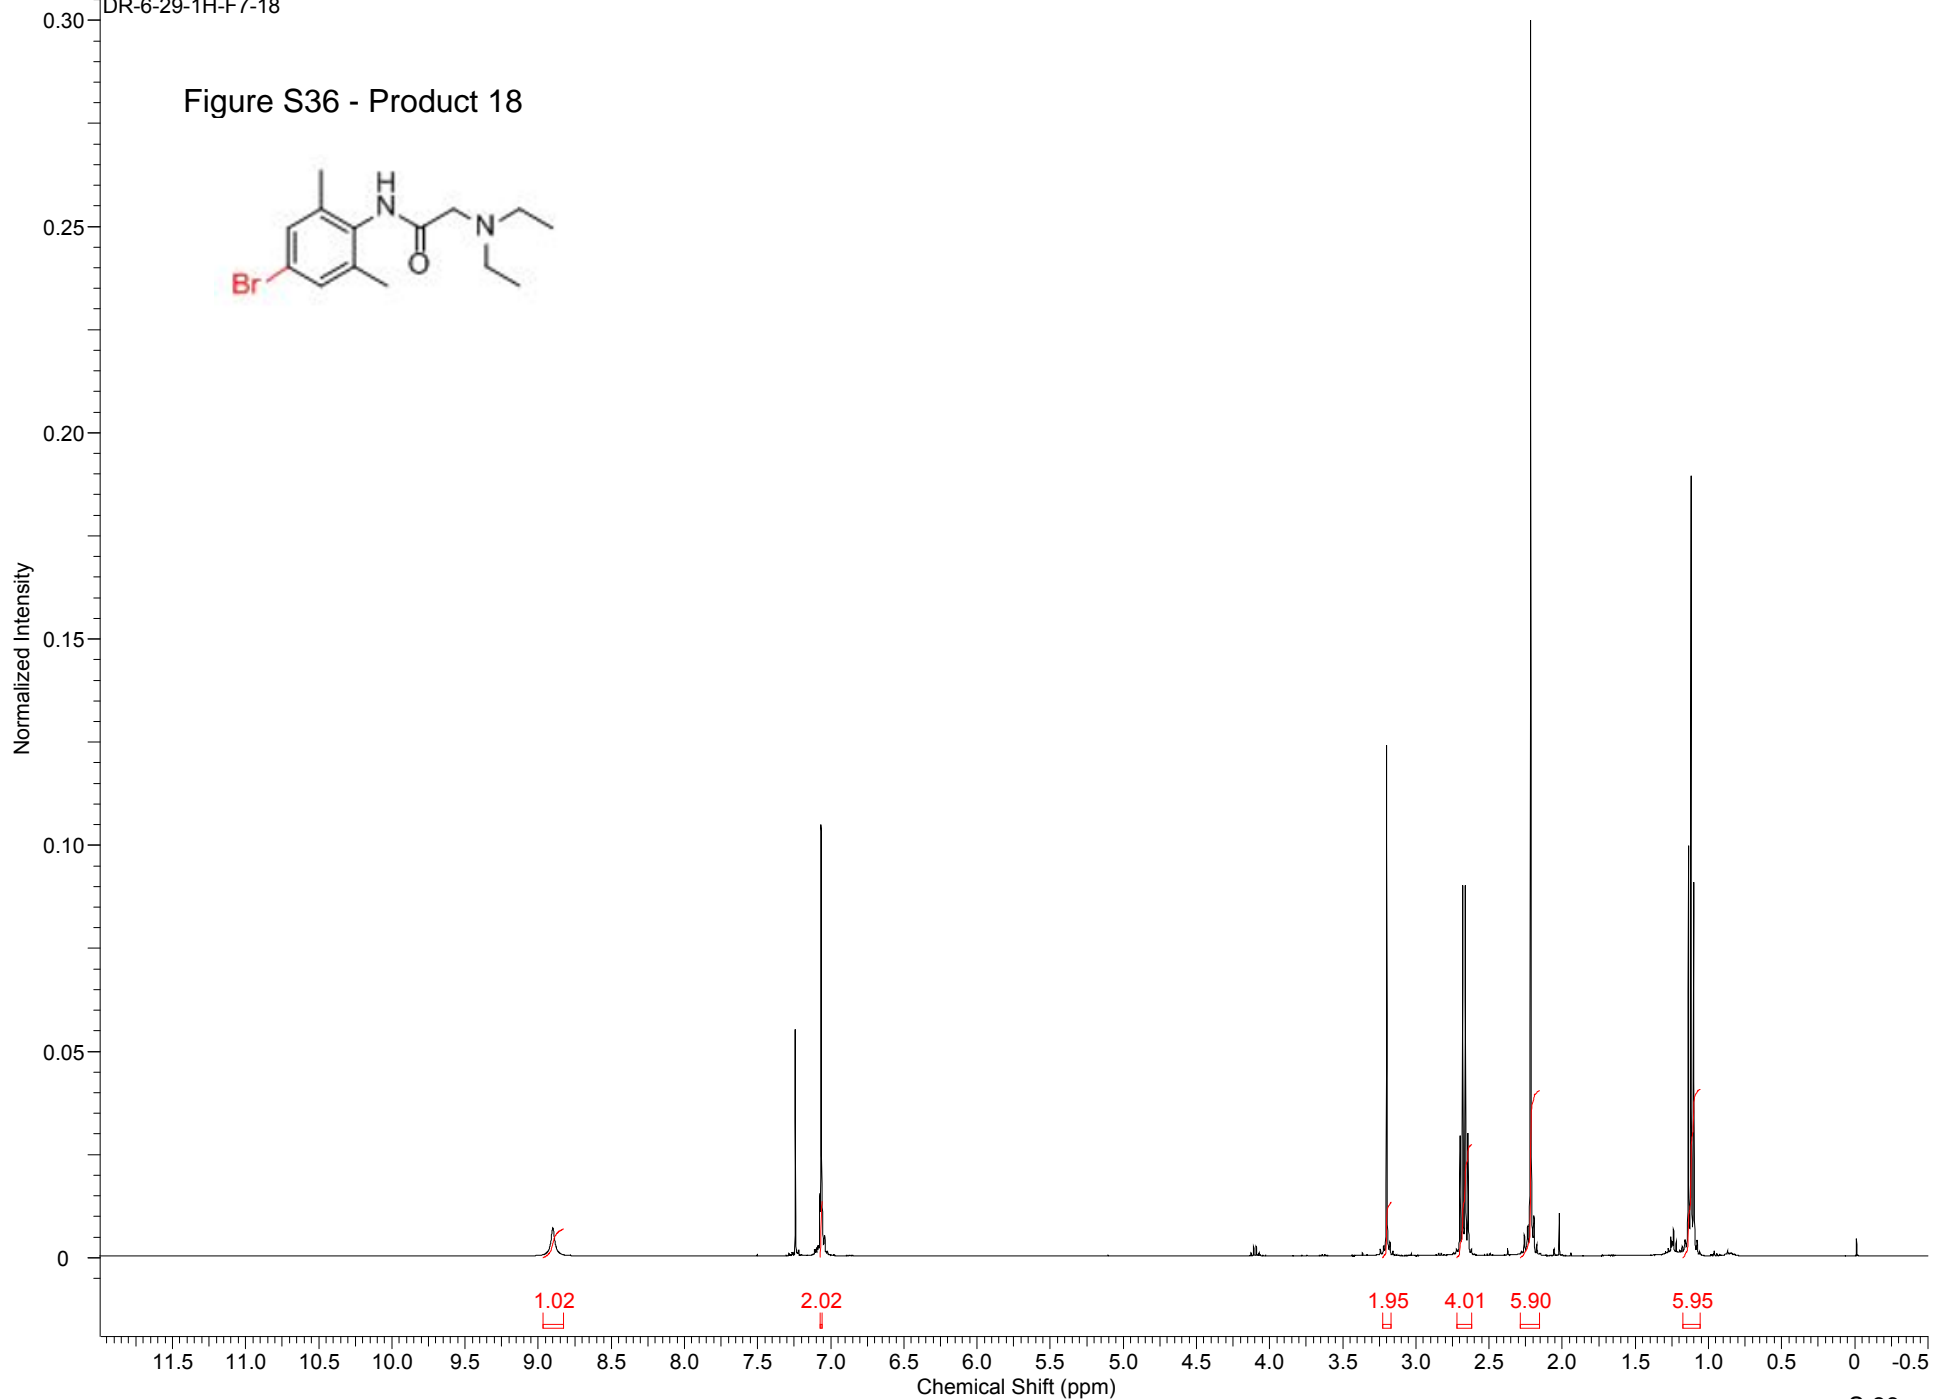

DR-6-29-F7-16-13C-pure

Figure S37 - Product 18

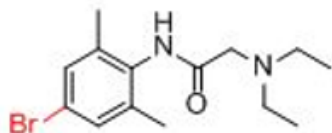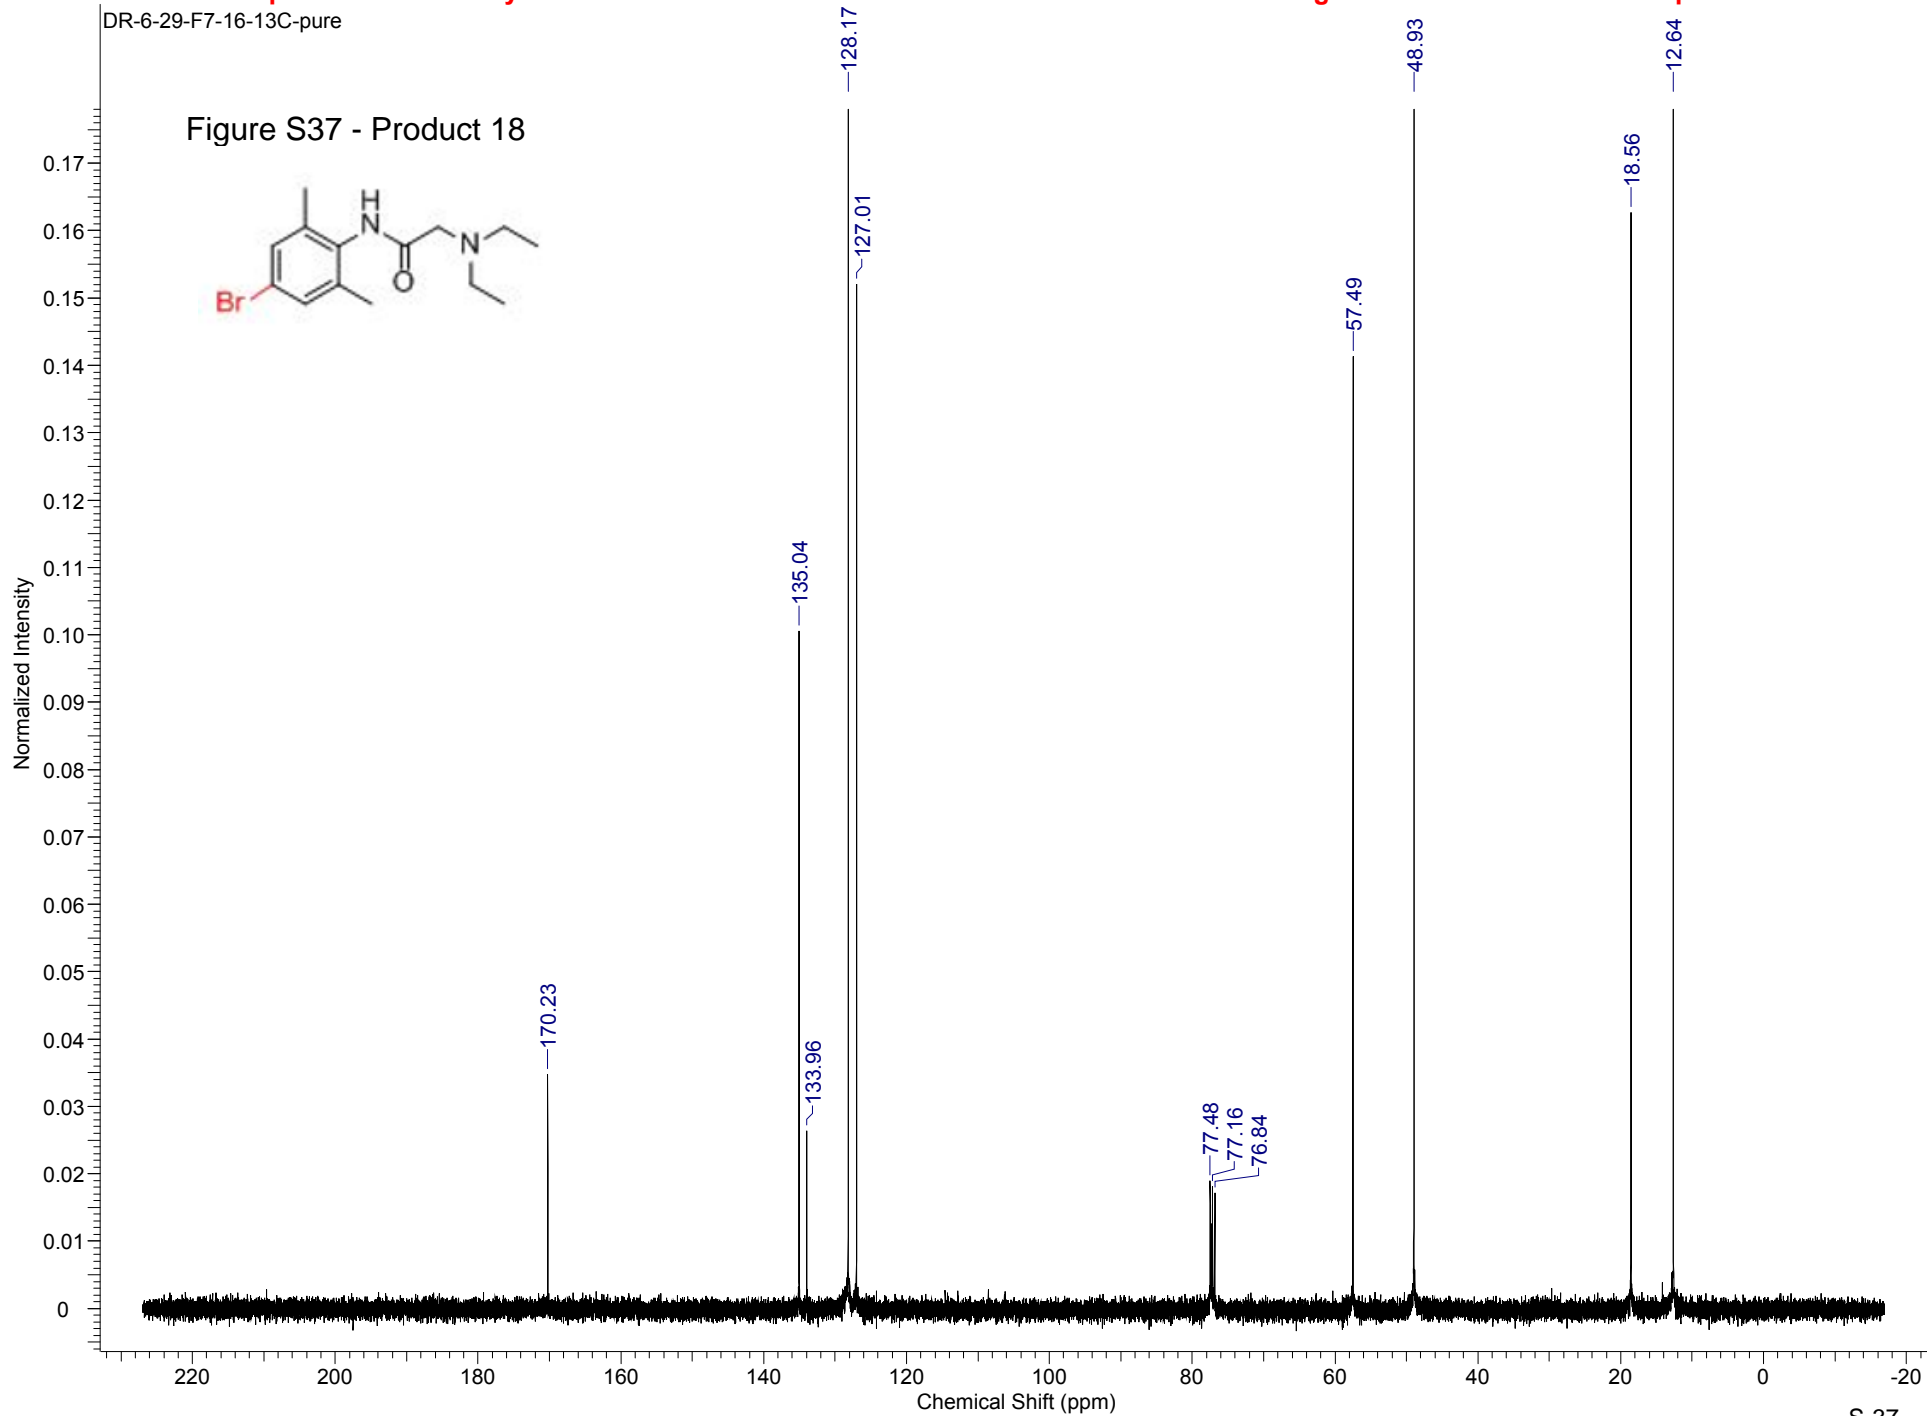

DR-5-178-F6-18-1H

Figure S38 - Product 19

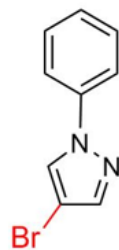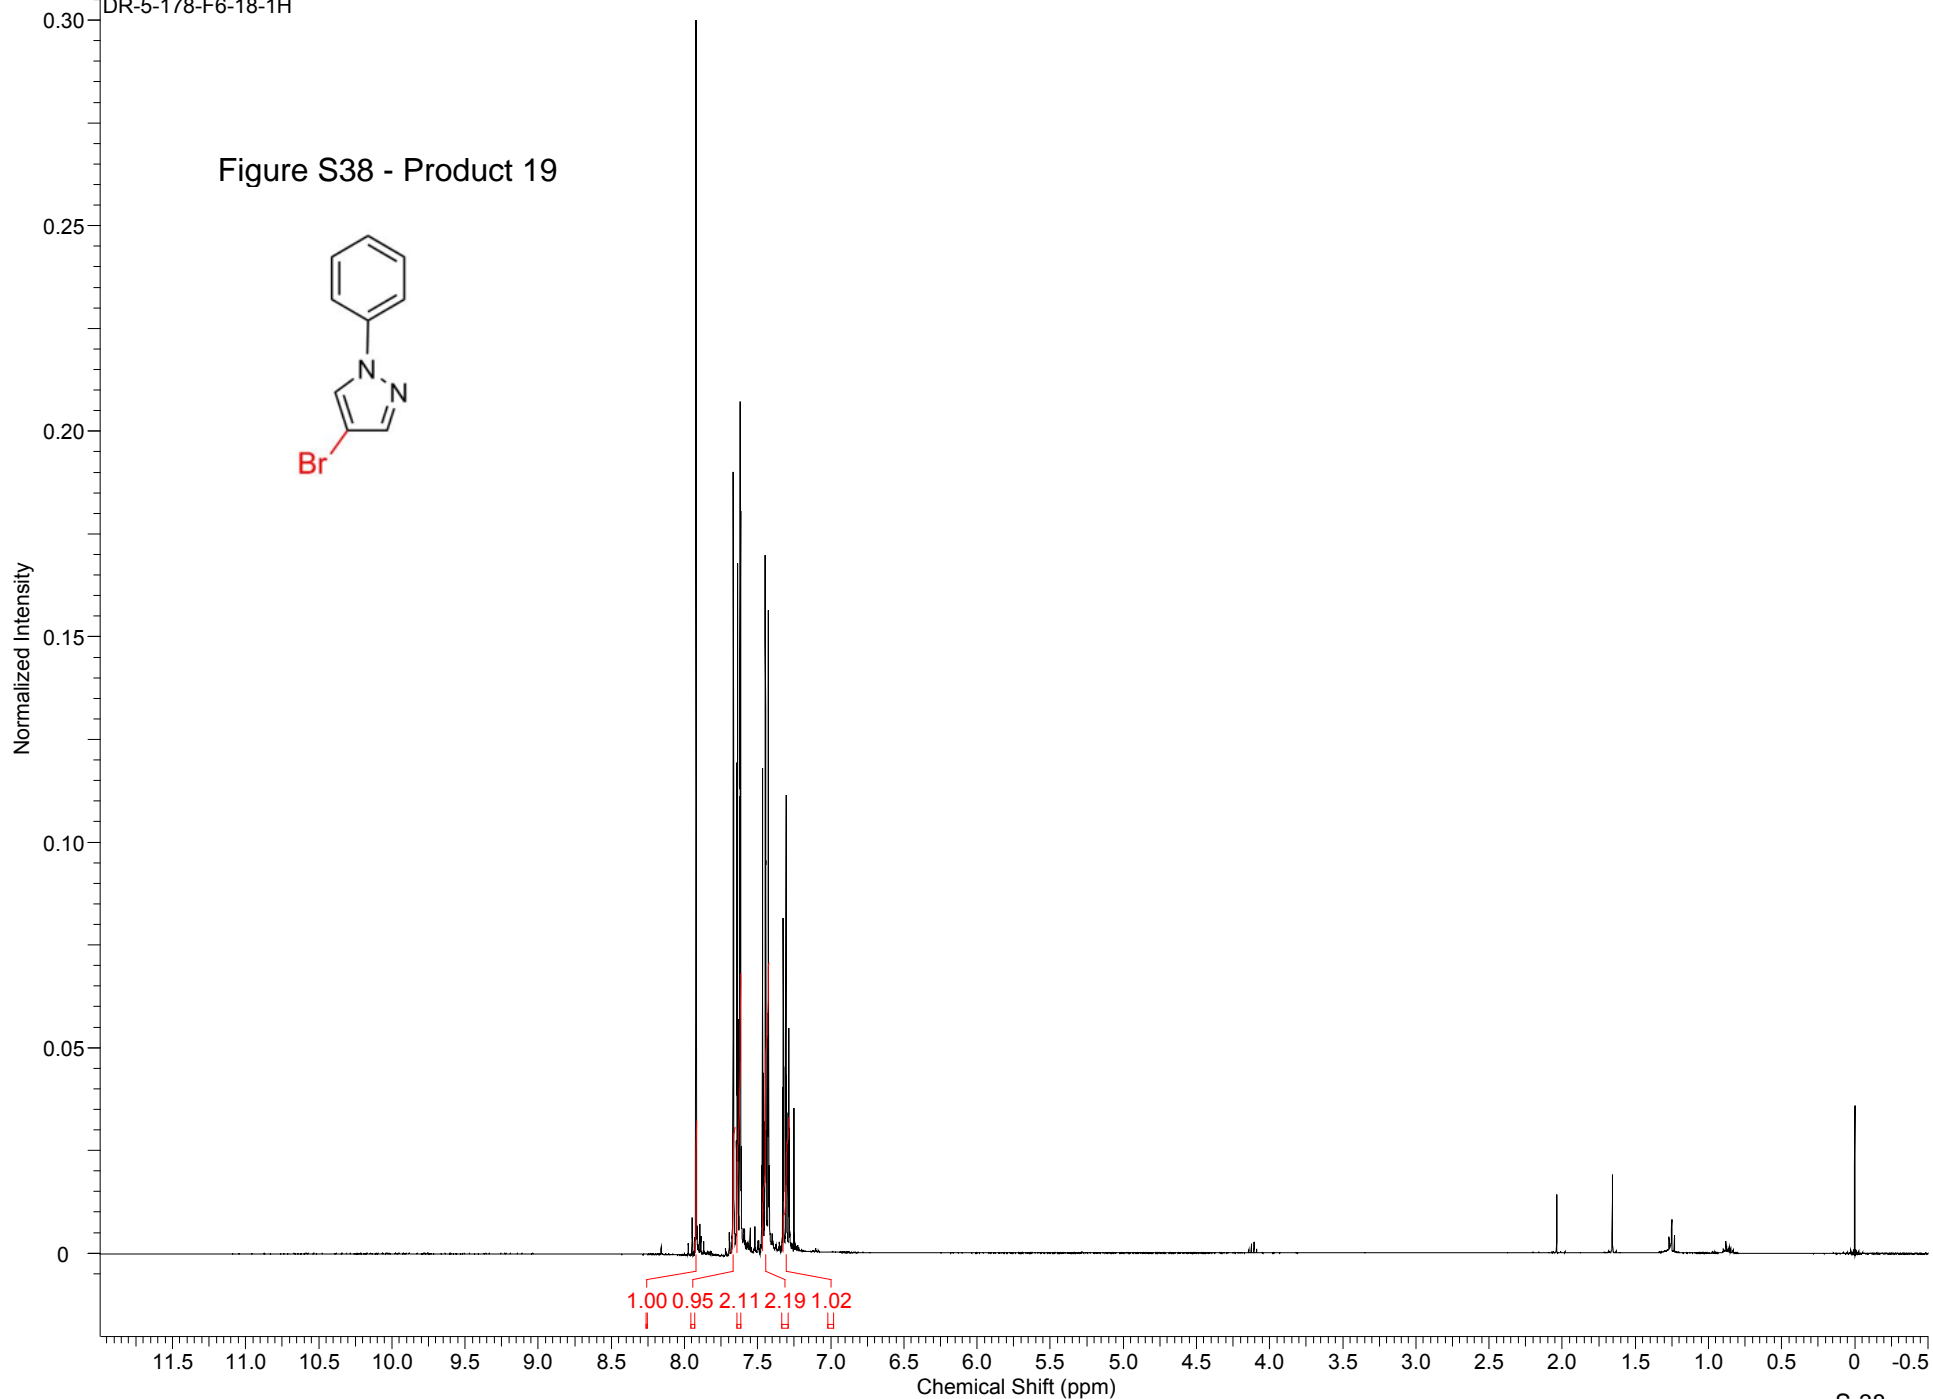

DR-5-178-5000scans-13C

Figure S39 - Product 19

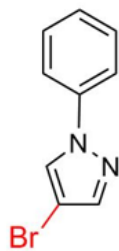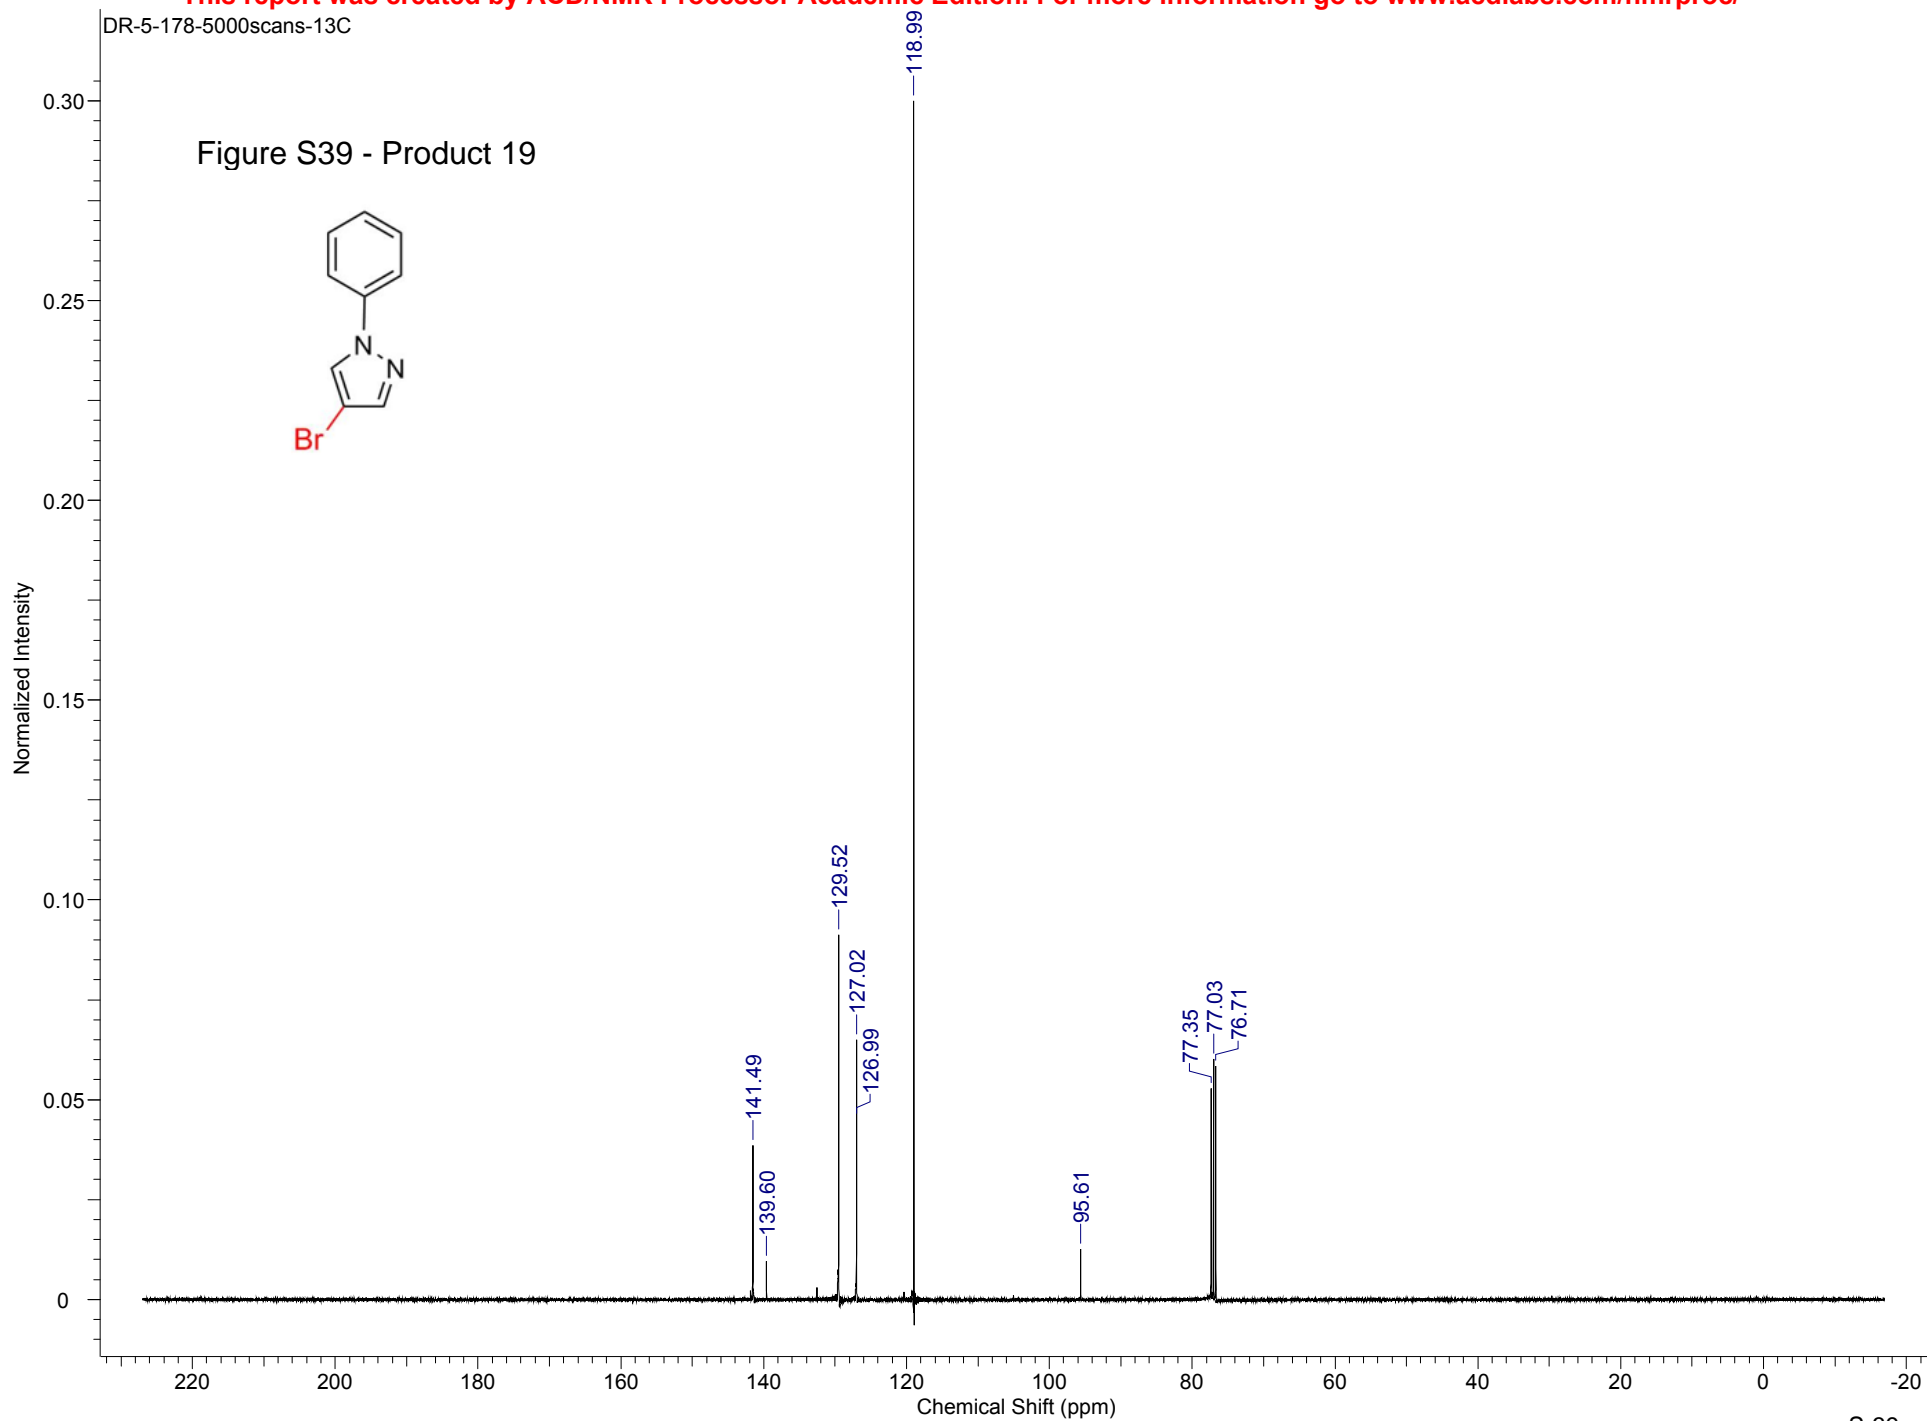

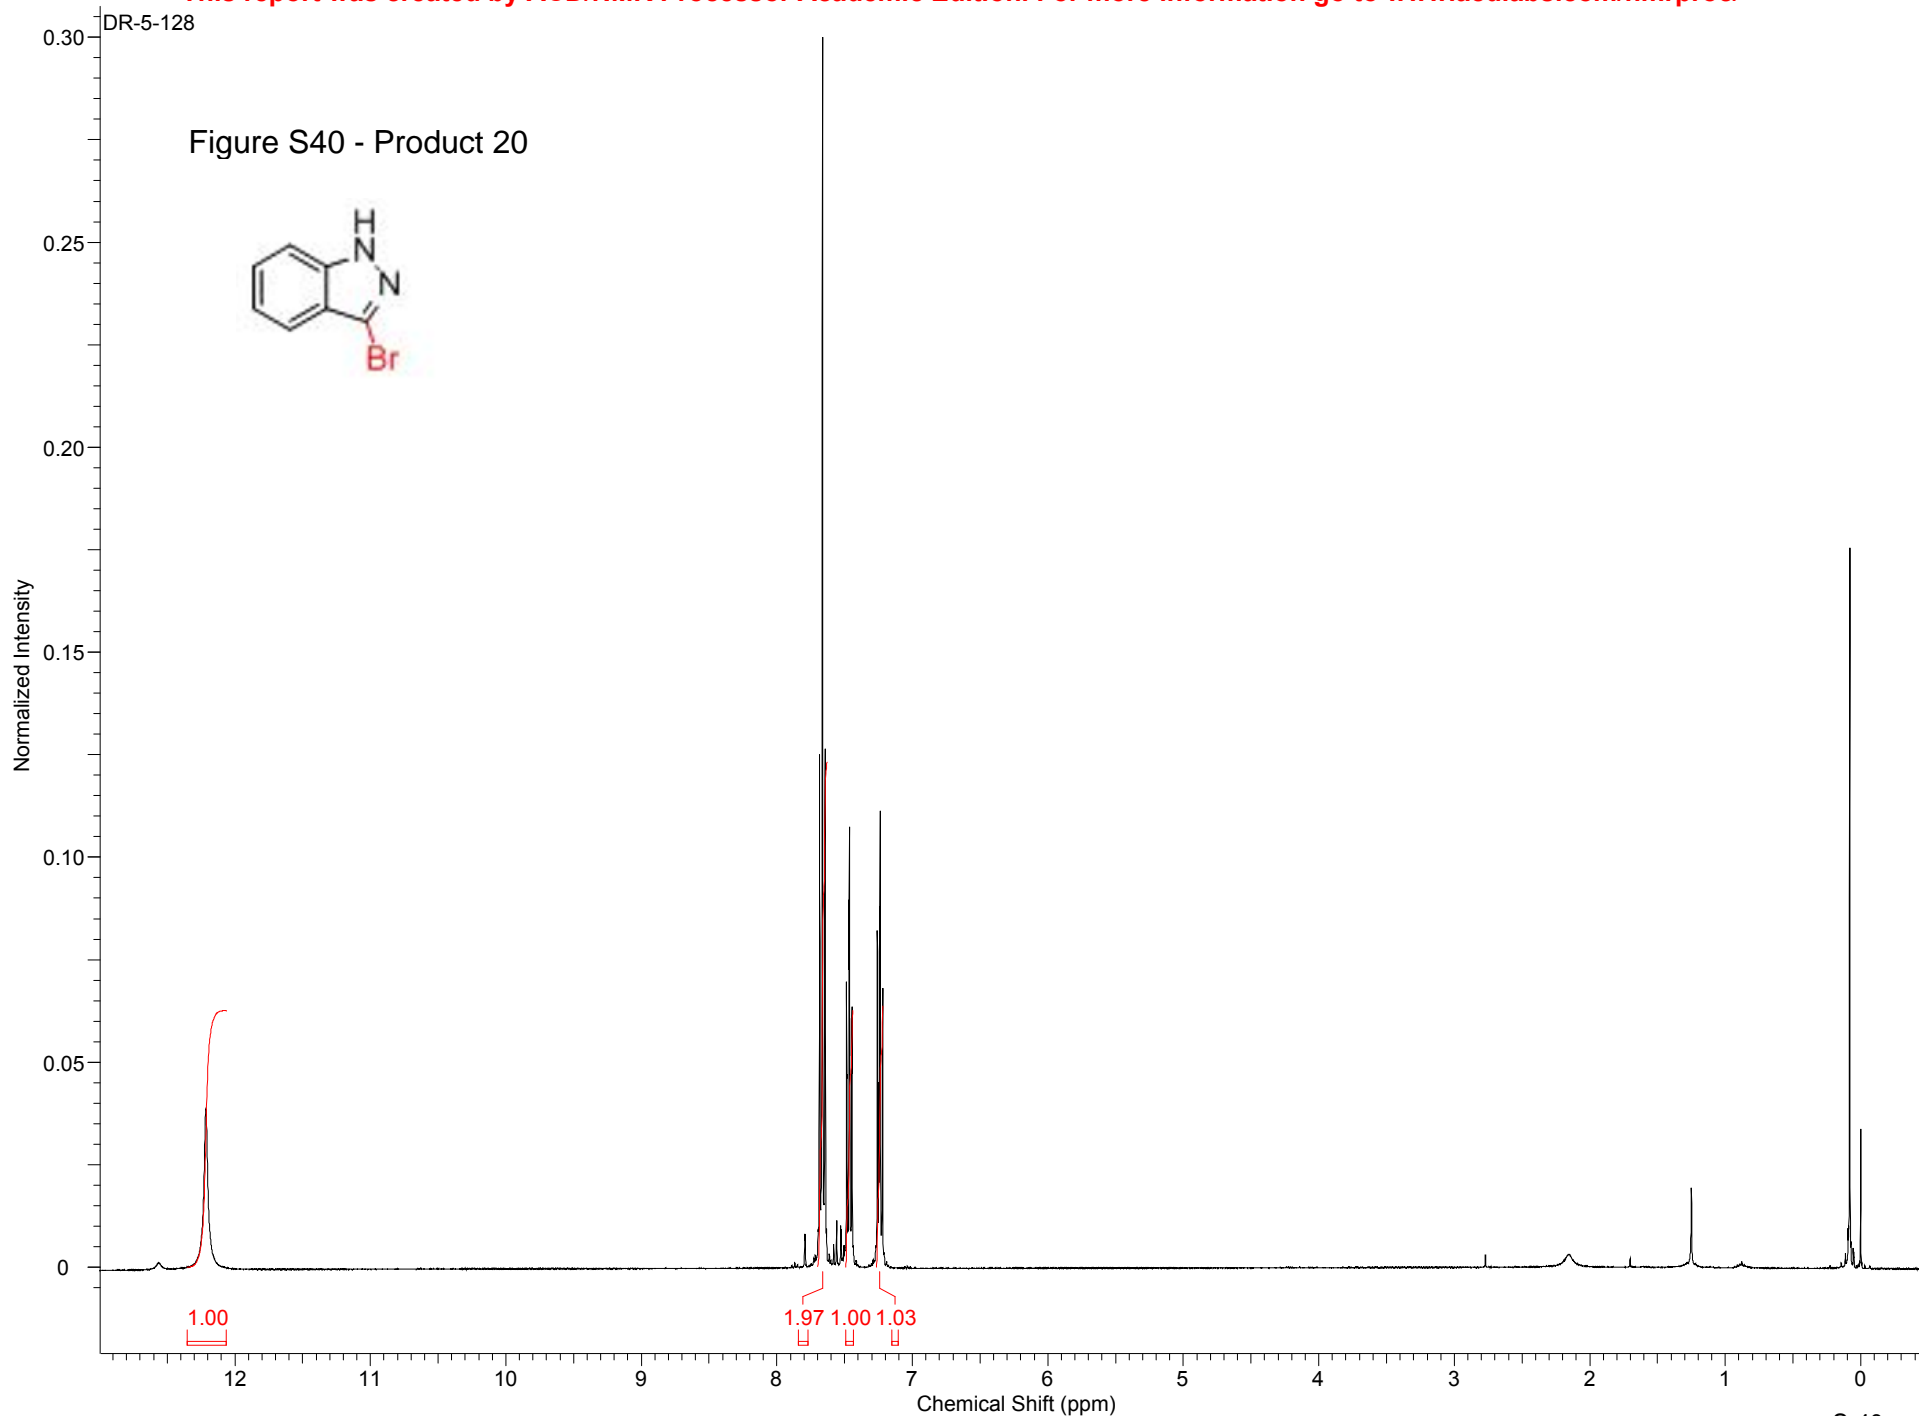



DR-5-128-13C

Figure S41 - Product 20

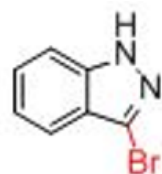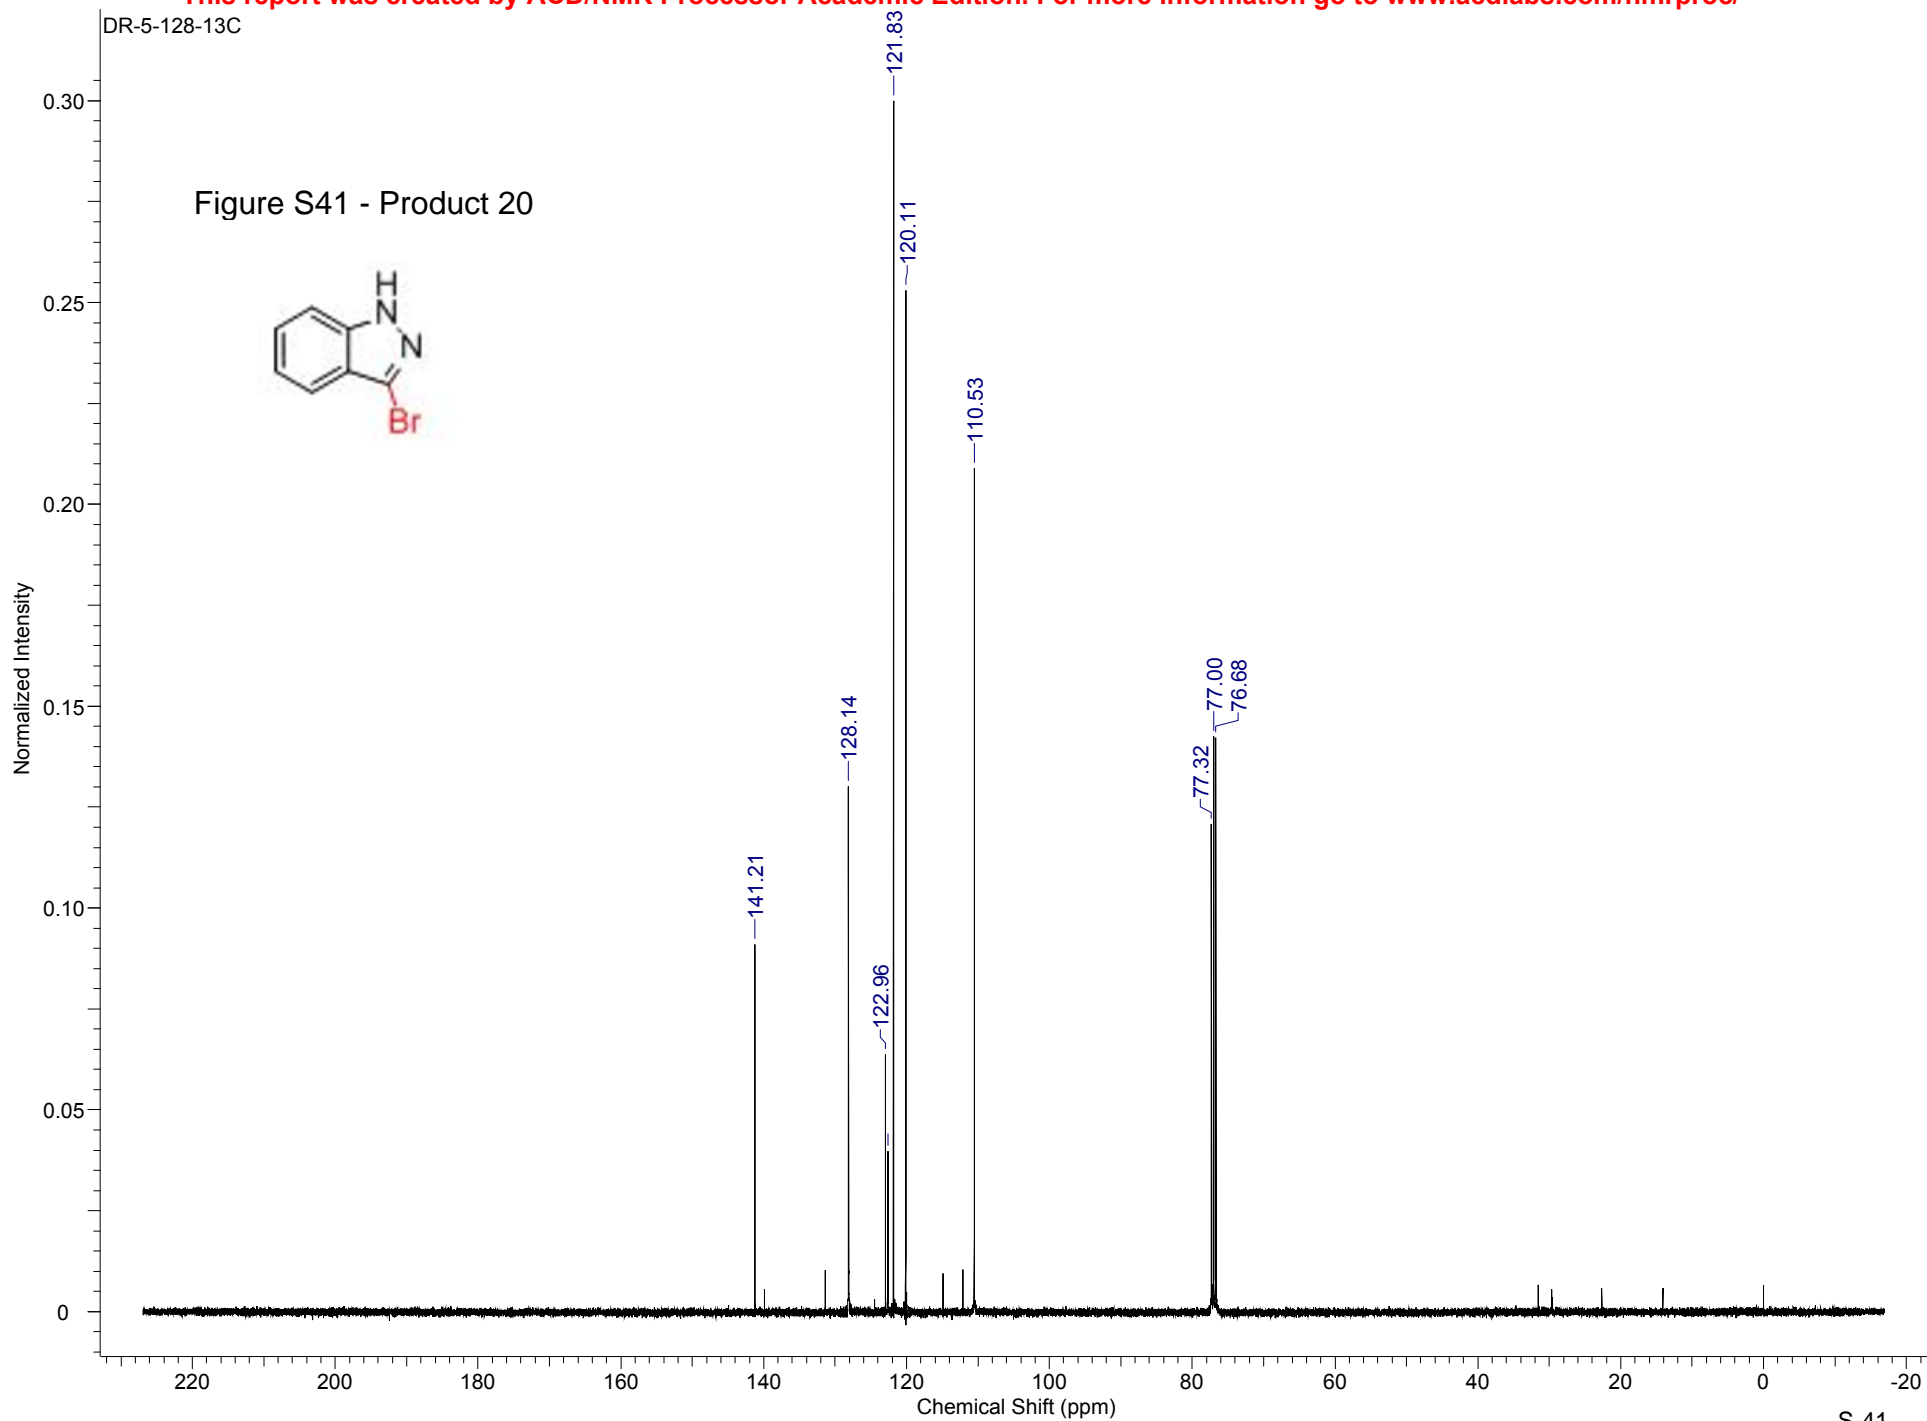

DR-6-60-F52-57-1H

Figure S42 - Product 21

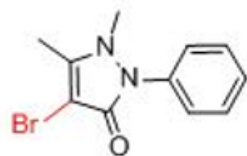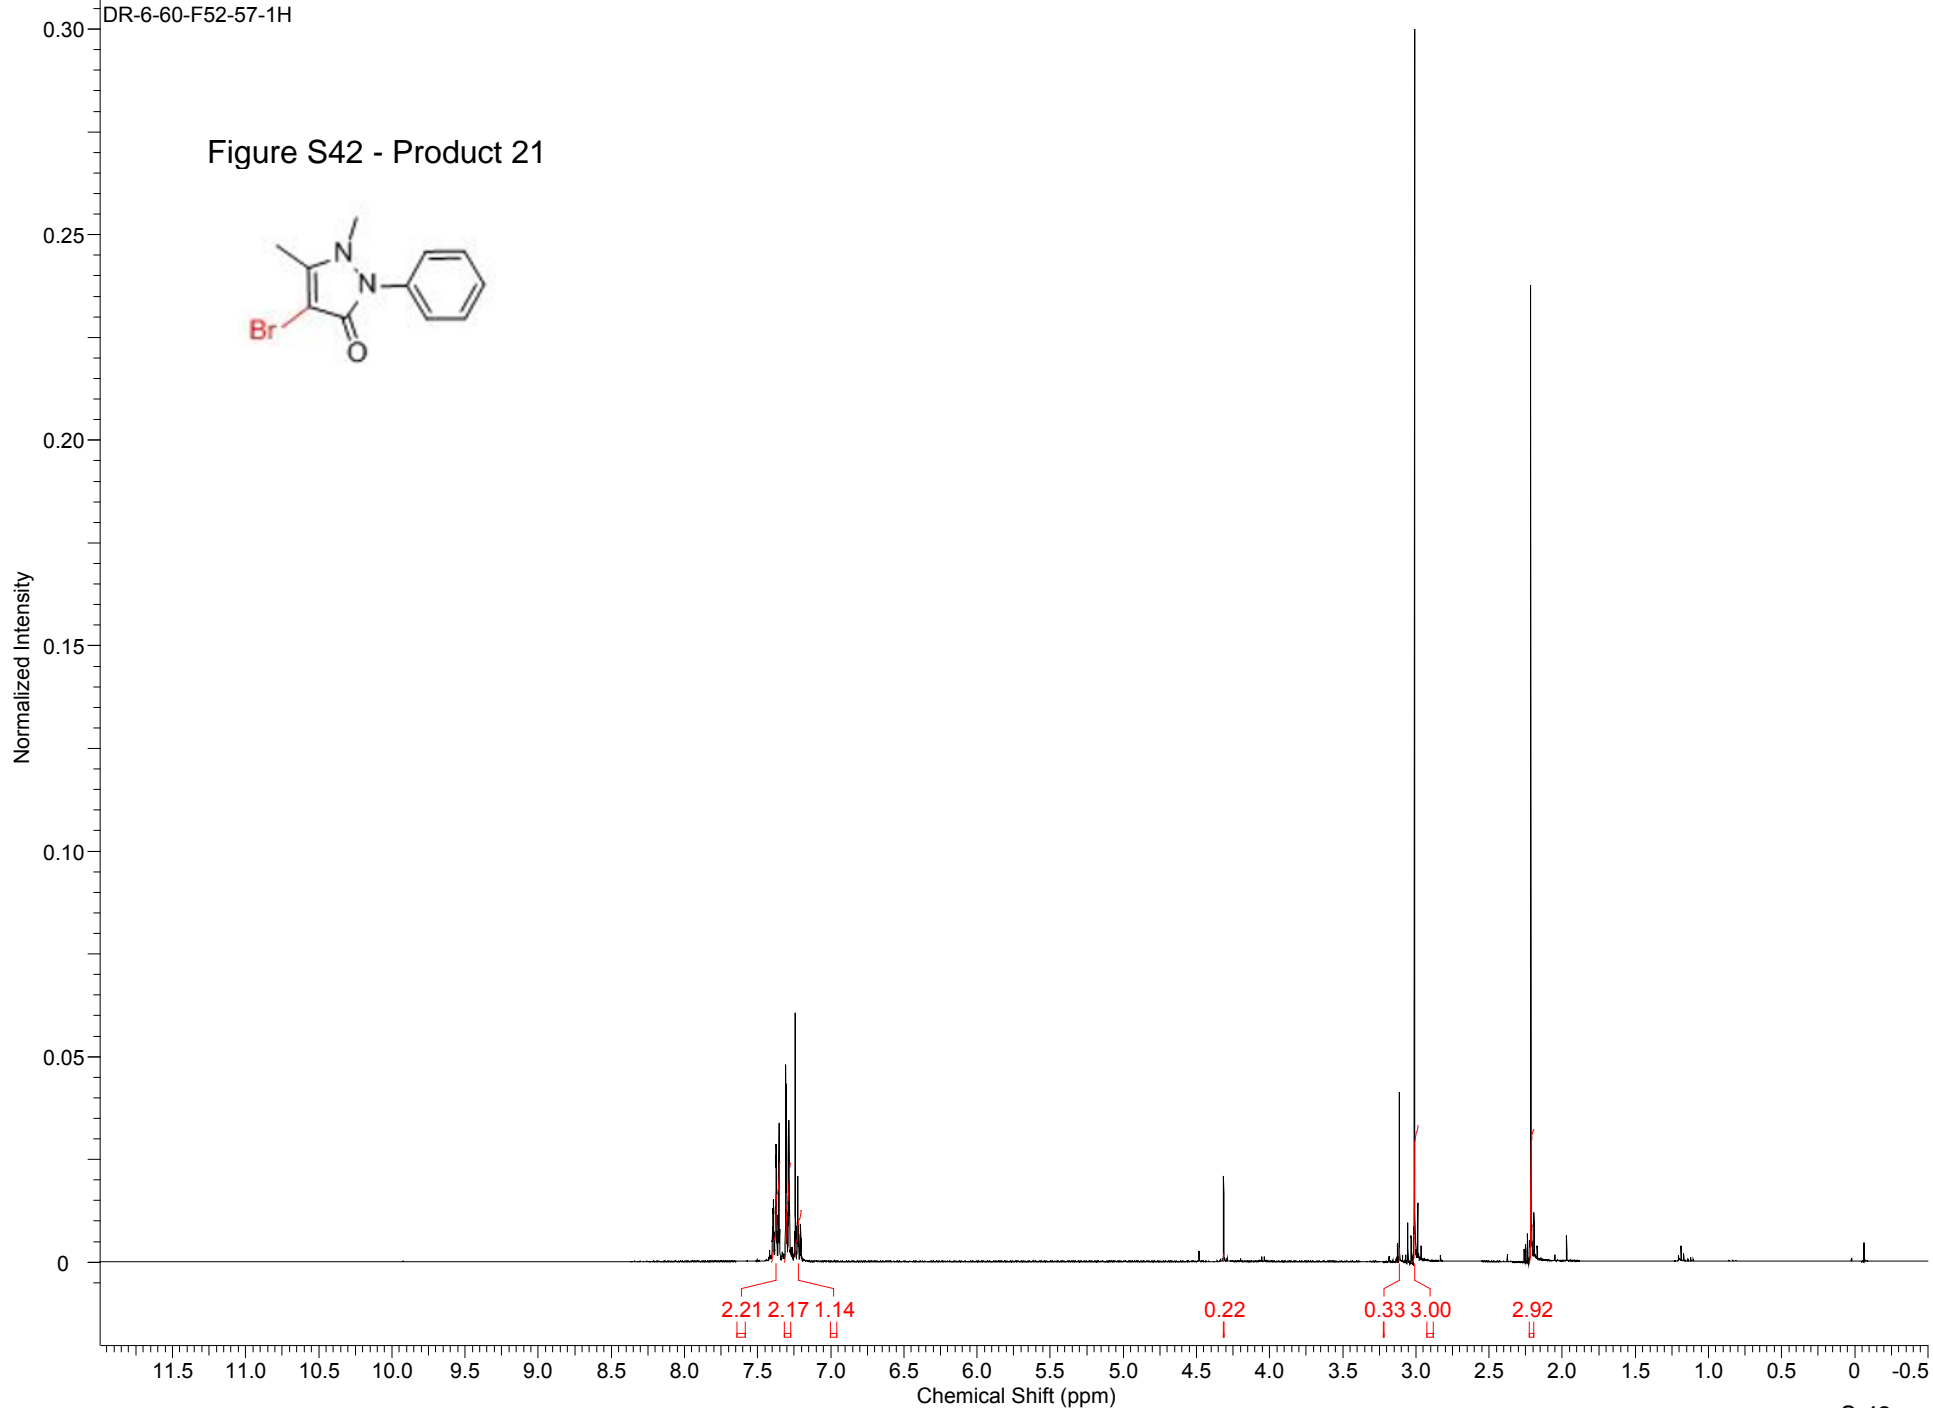

DR-6-60-13C

Figure S43 - Product 21

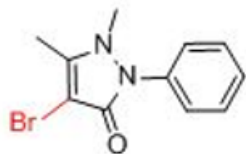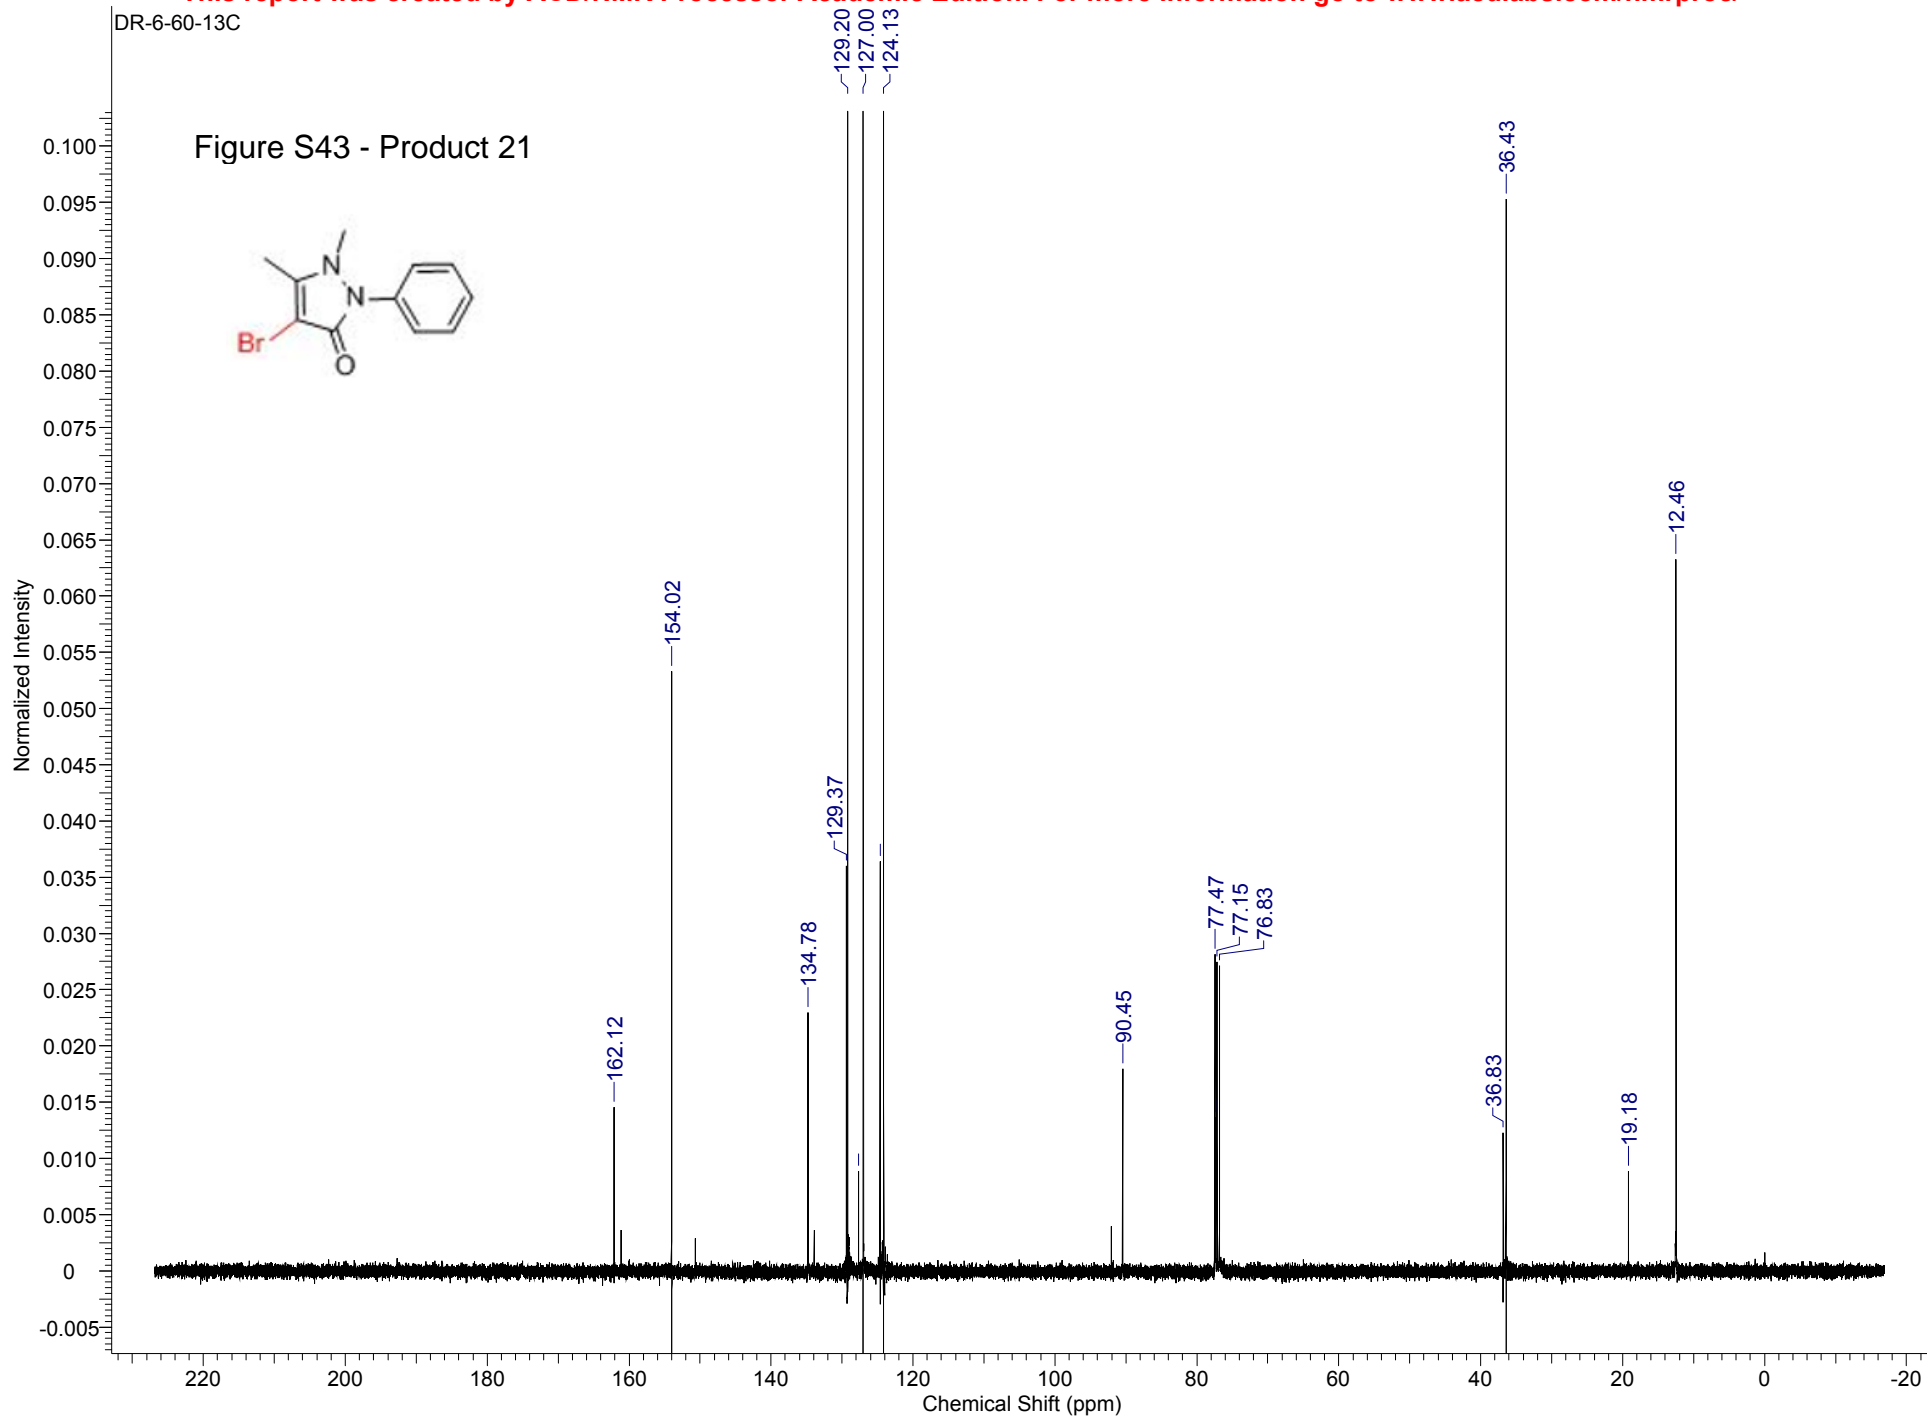

DR-6-56-NaOHwash

Figure S44 - Product 22

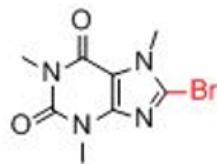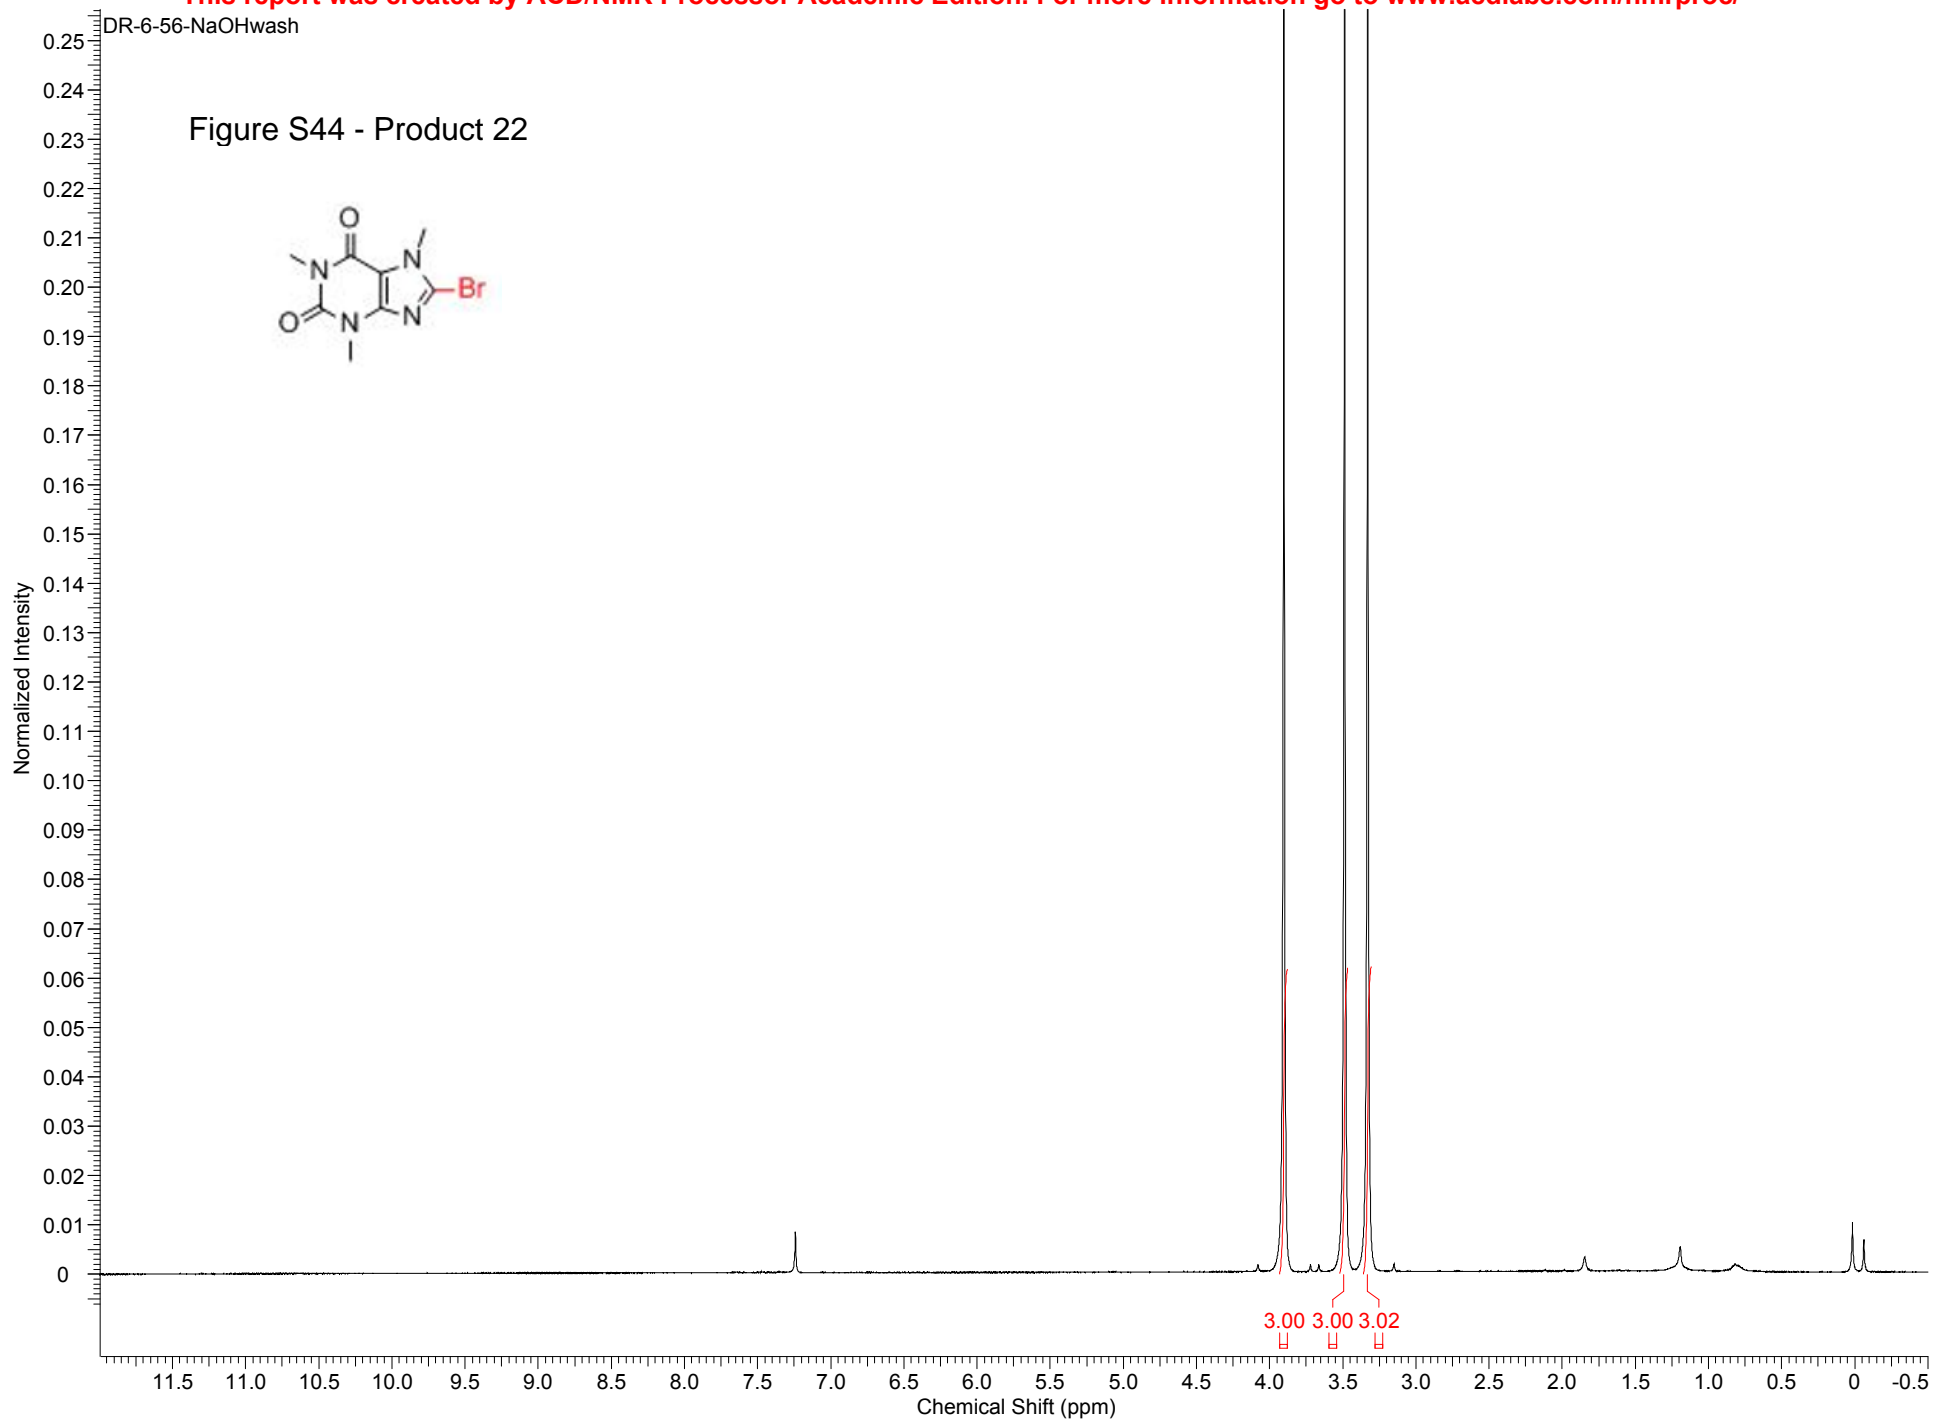

DR-6-56-4500scans-13C

Figure S45 - Product 22

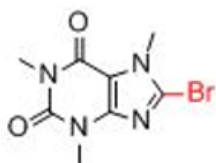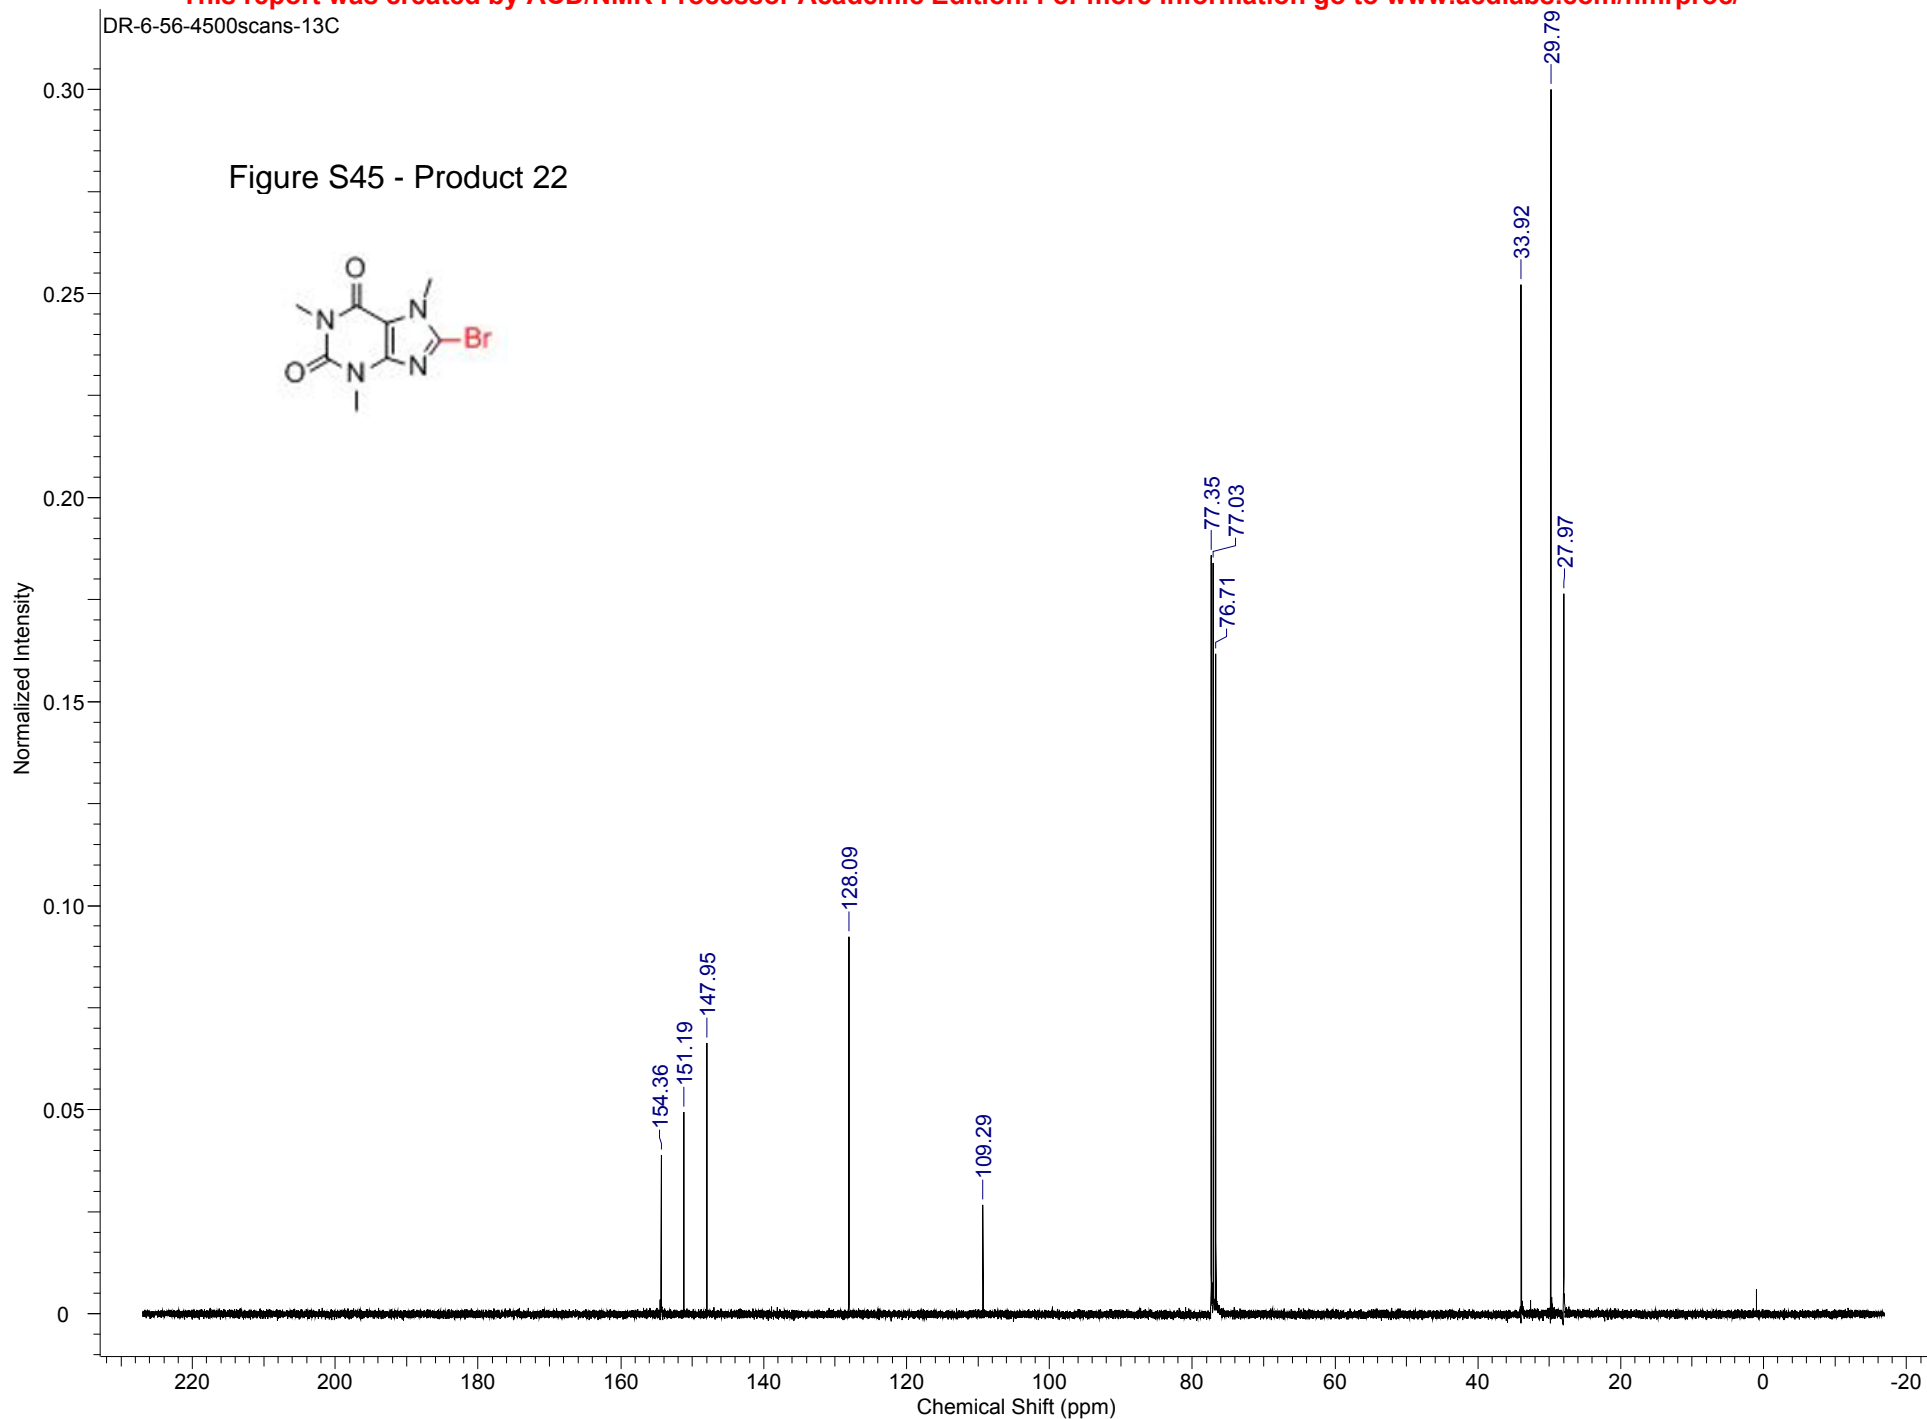

DR-6-137-1H

Figure S46 - Product 23

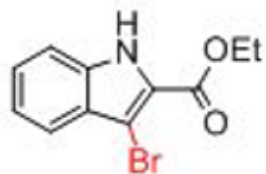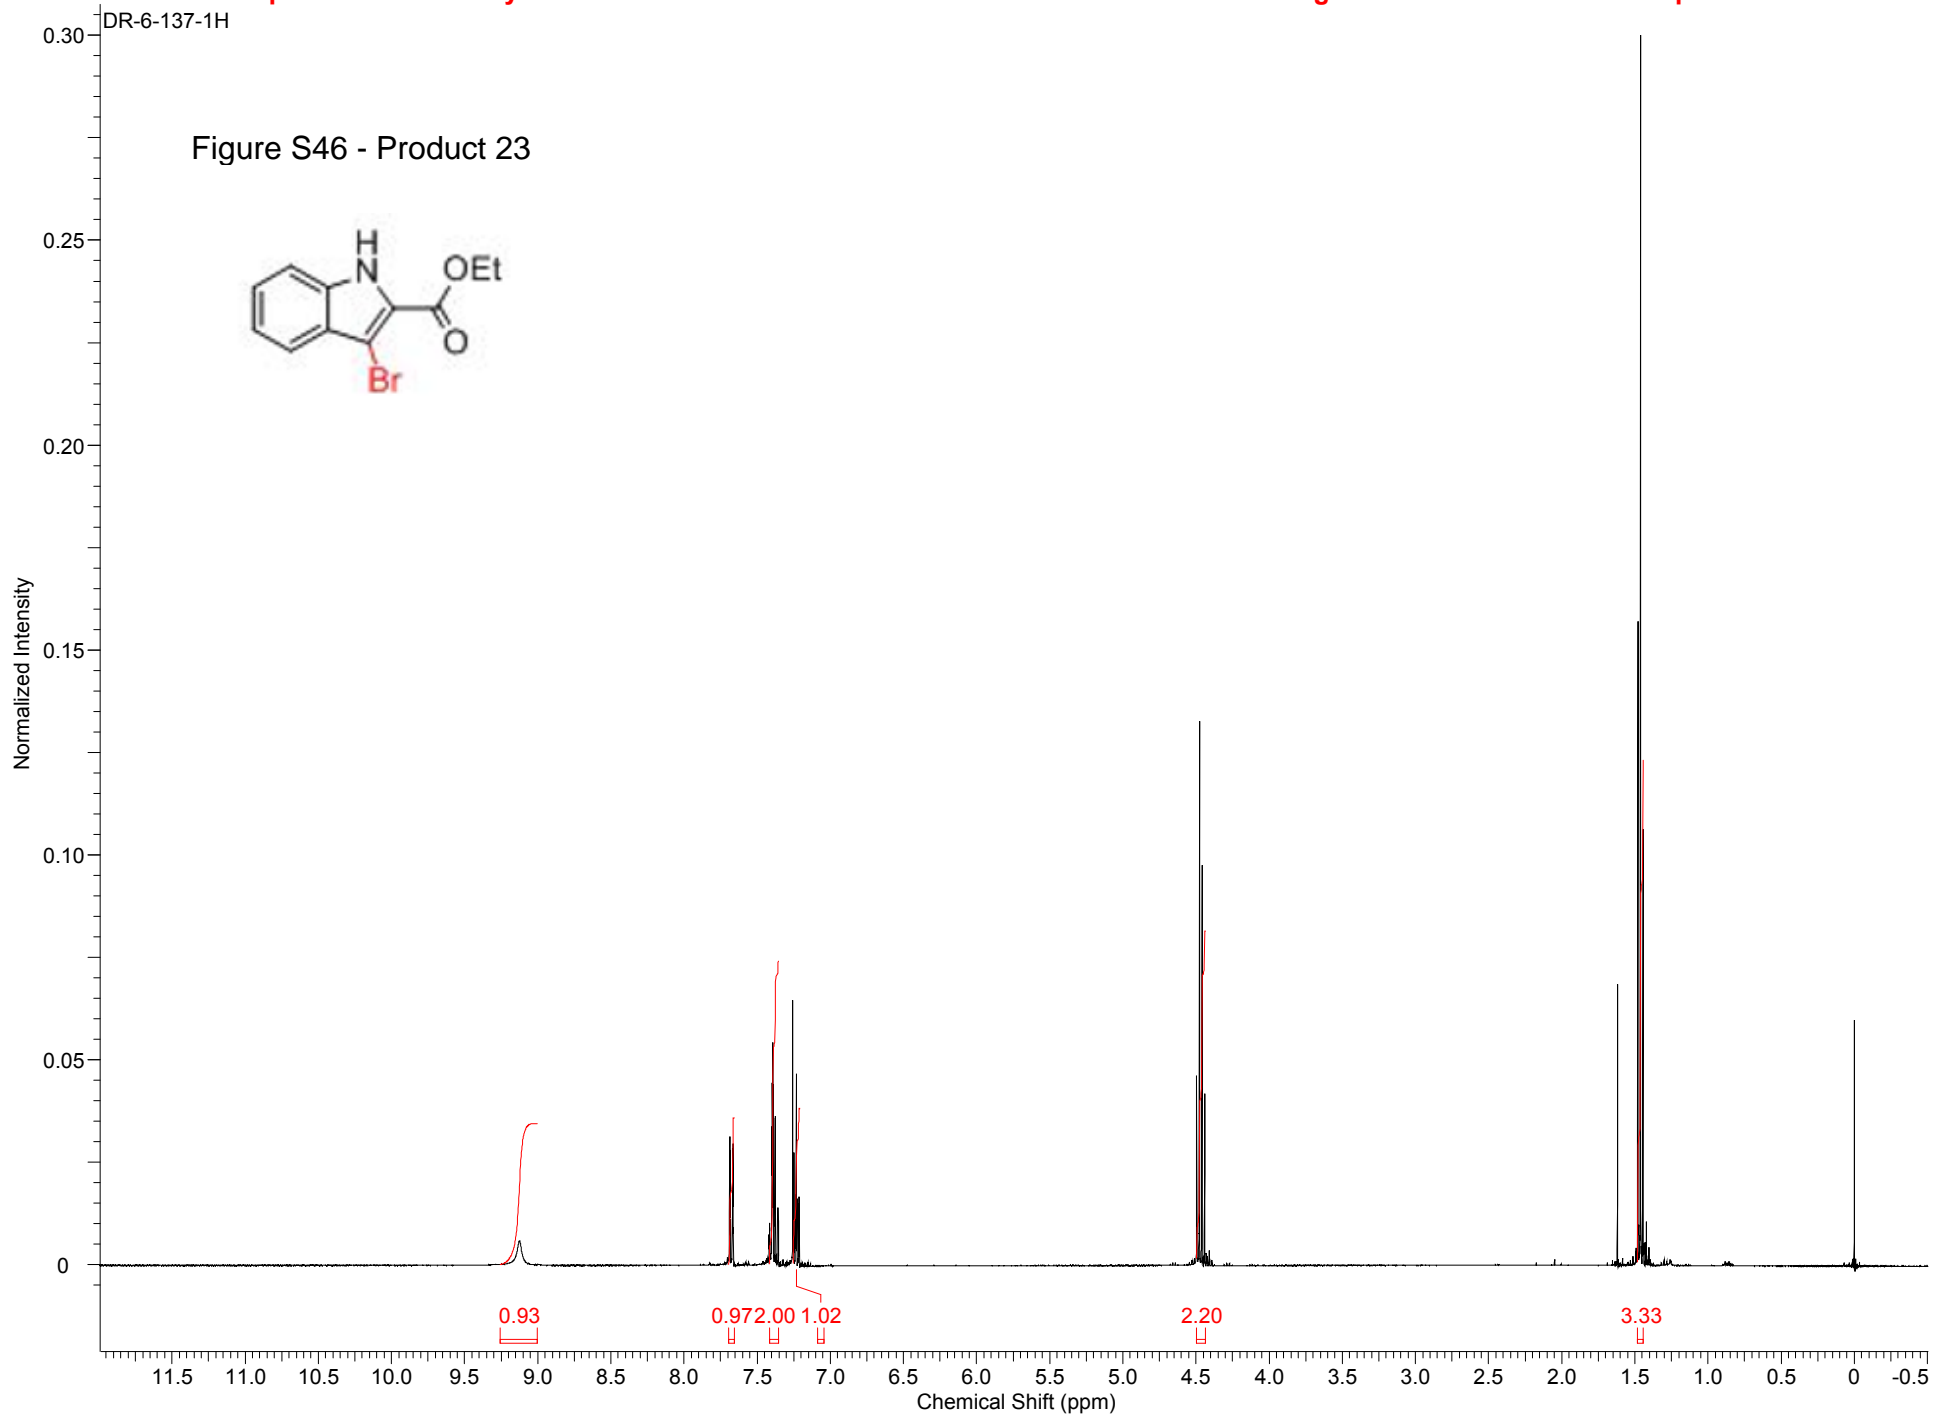

DR-6-132-3900scans-sep6-13C

Figure S47 - Product 23

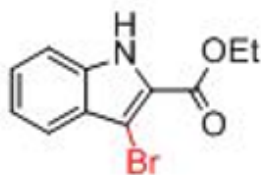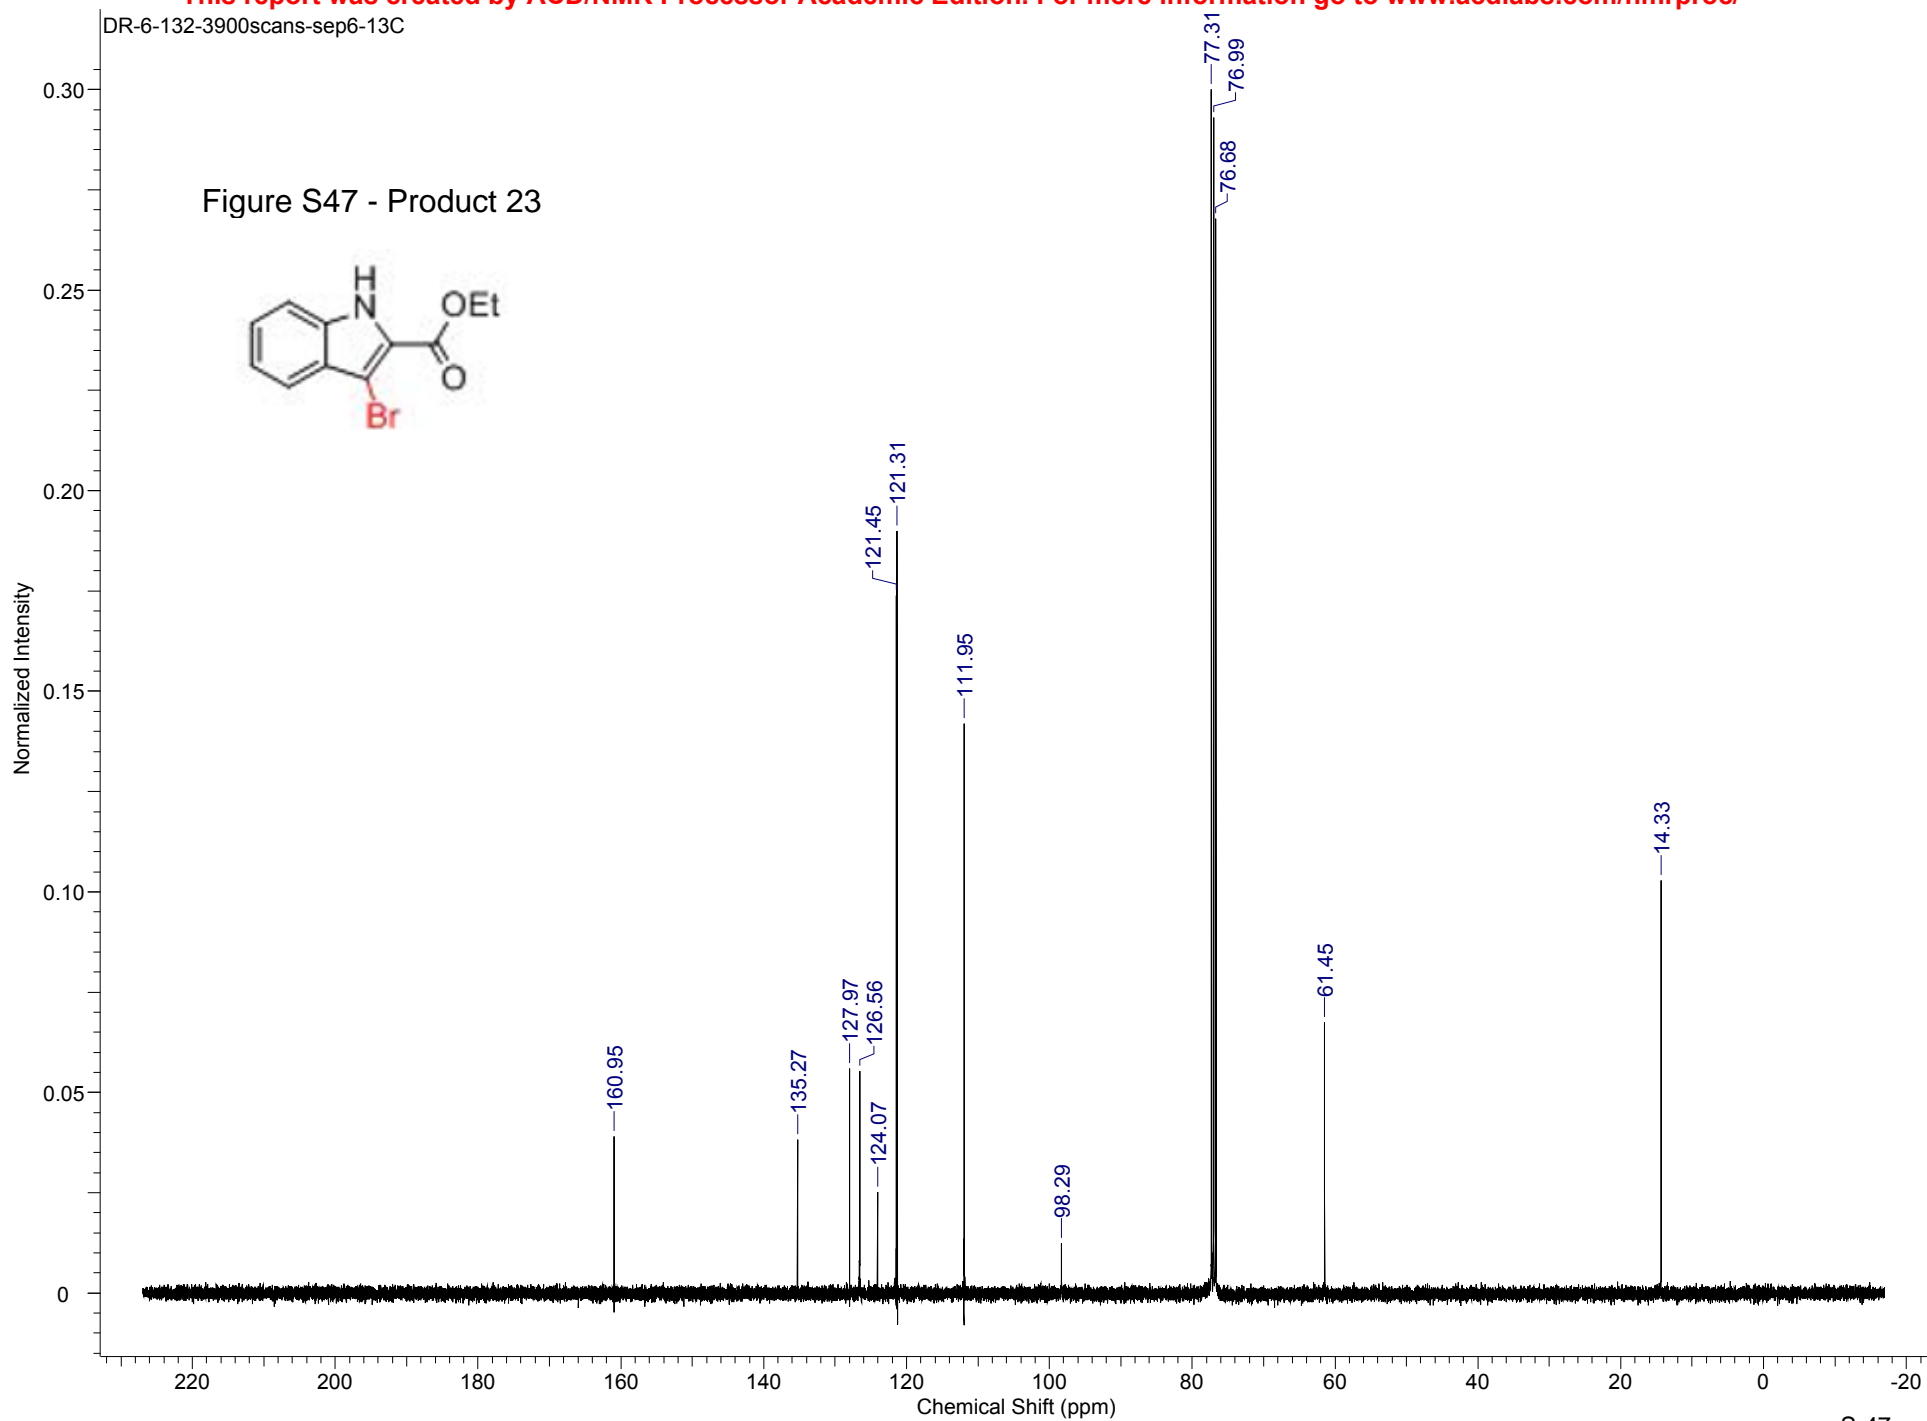

DR-6-139-JUL24-2

Figure S48 - Product 24

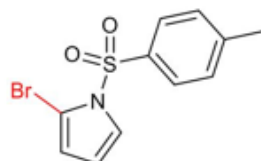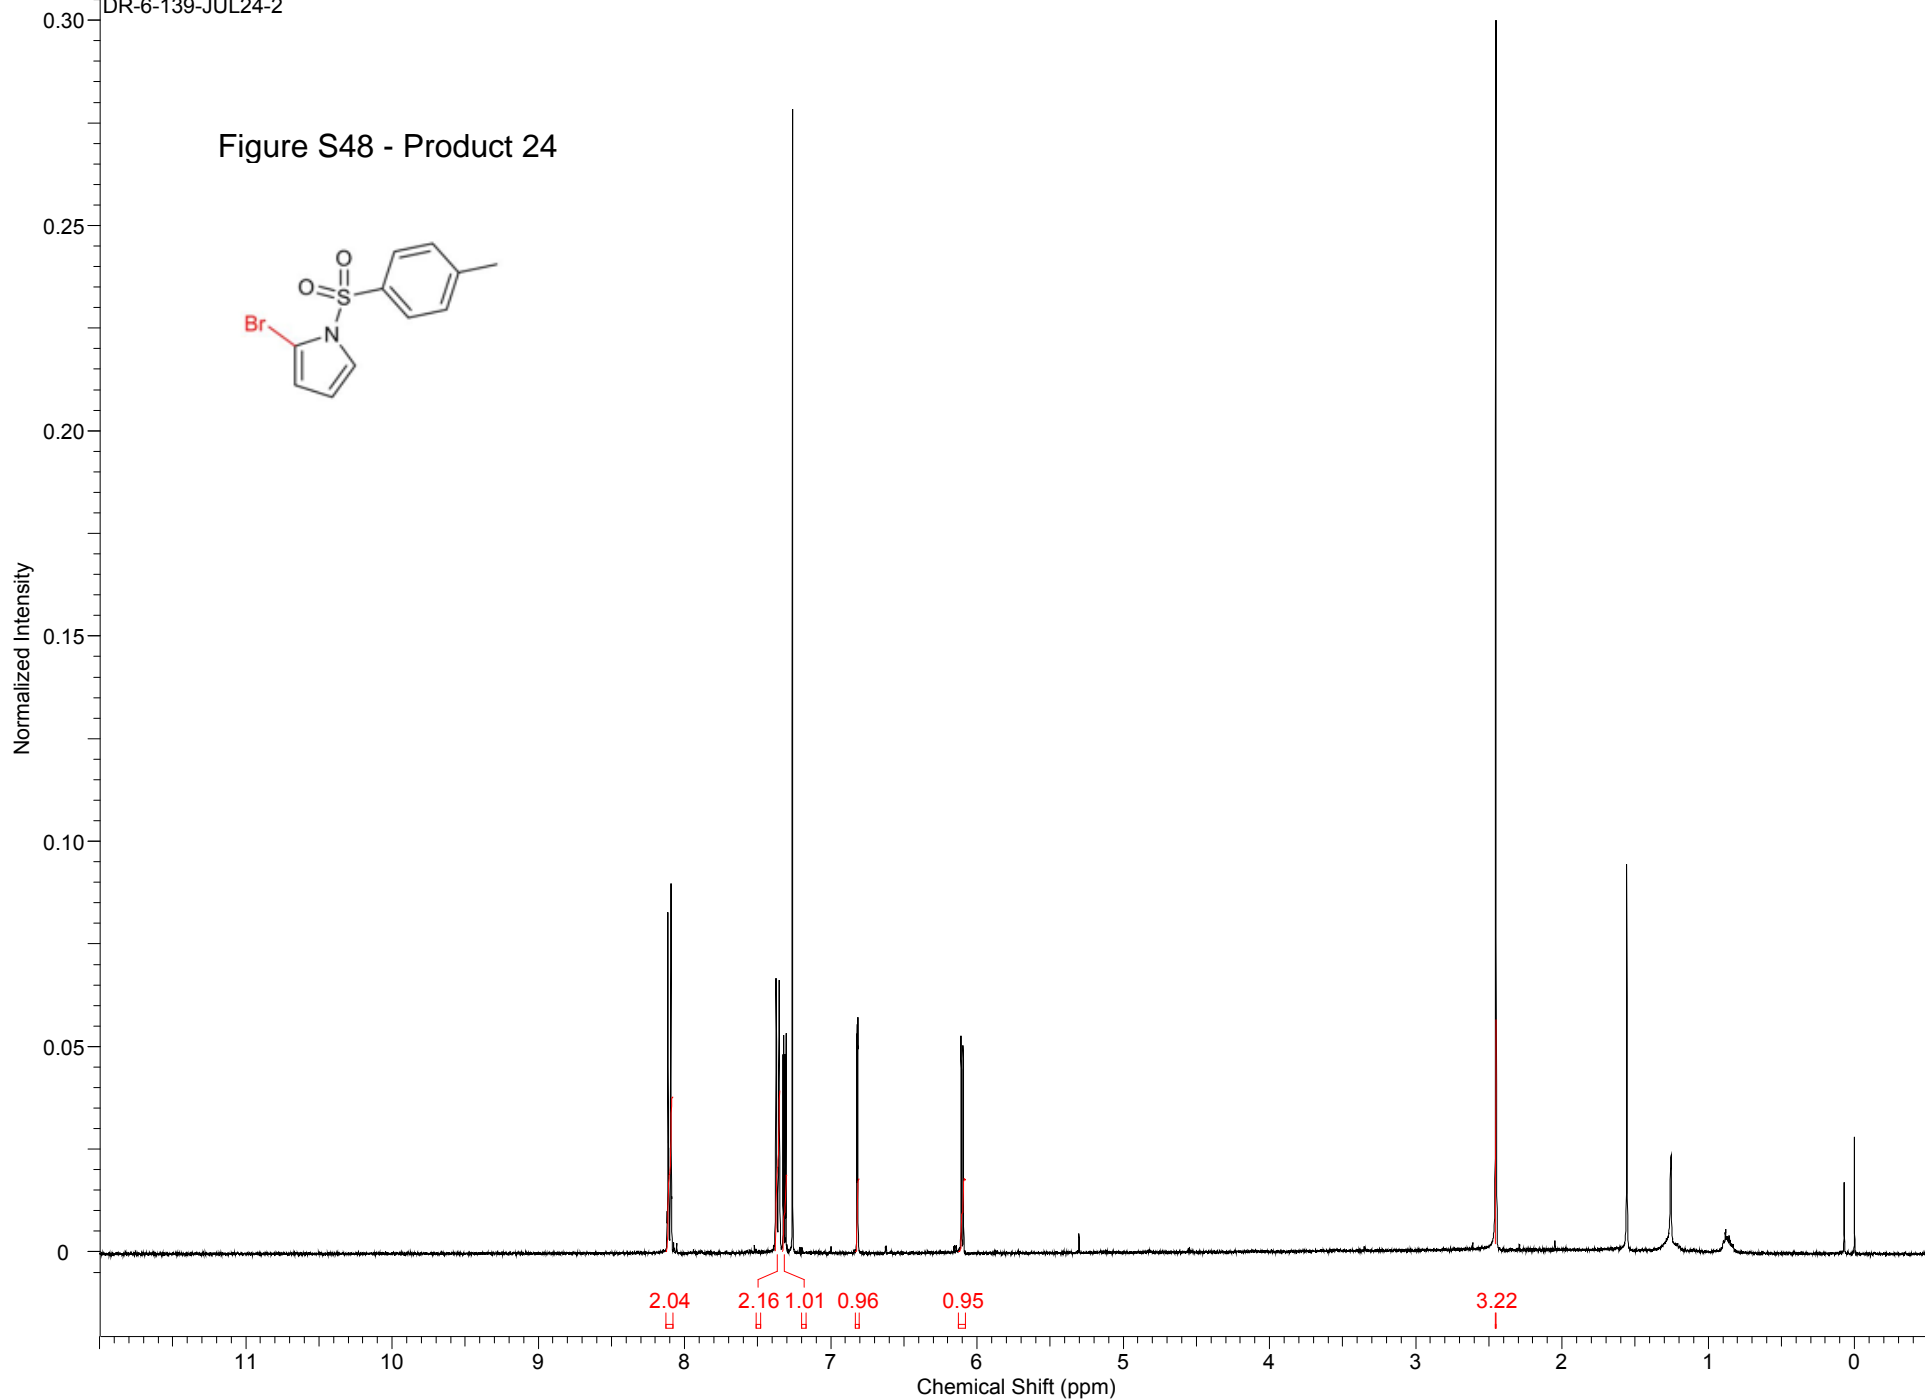



DR-6-139A-F38-53-13C

Figure S49 - Product 24

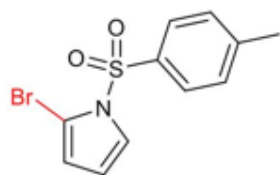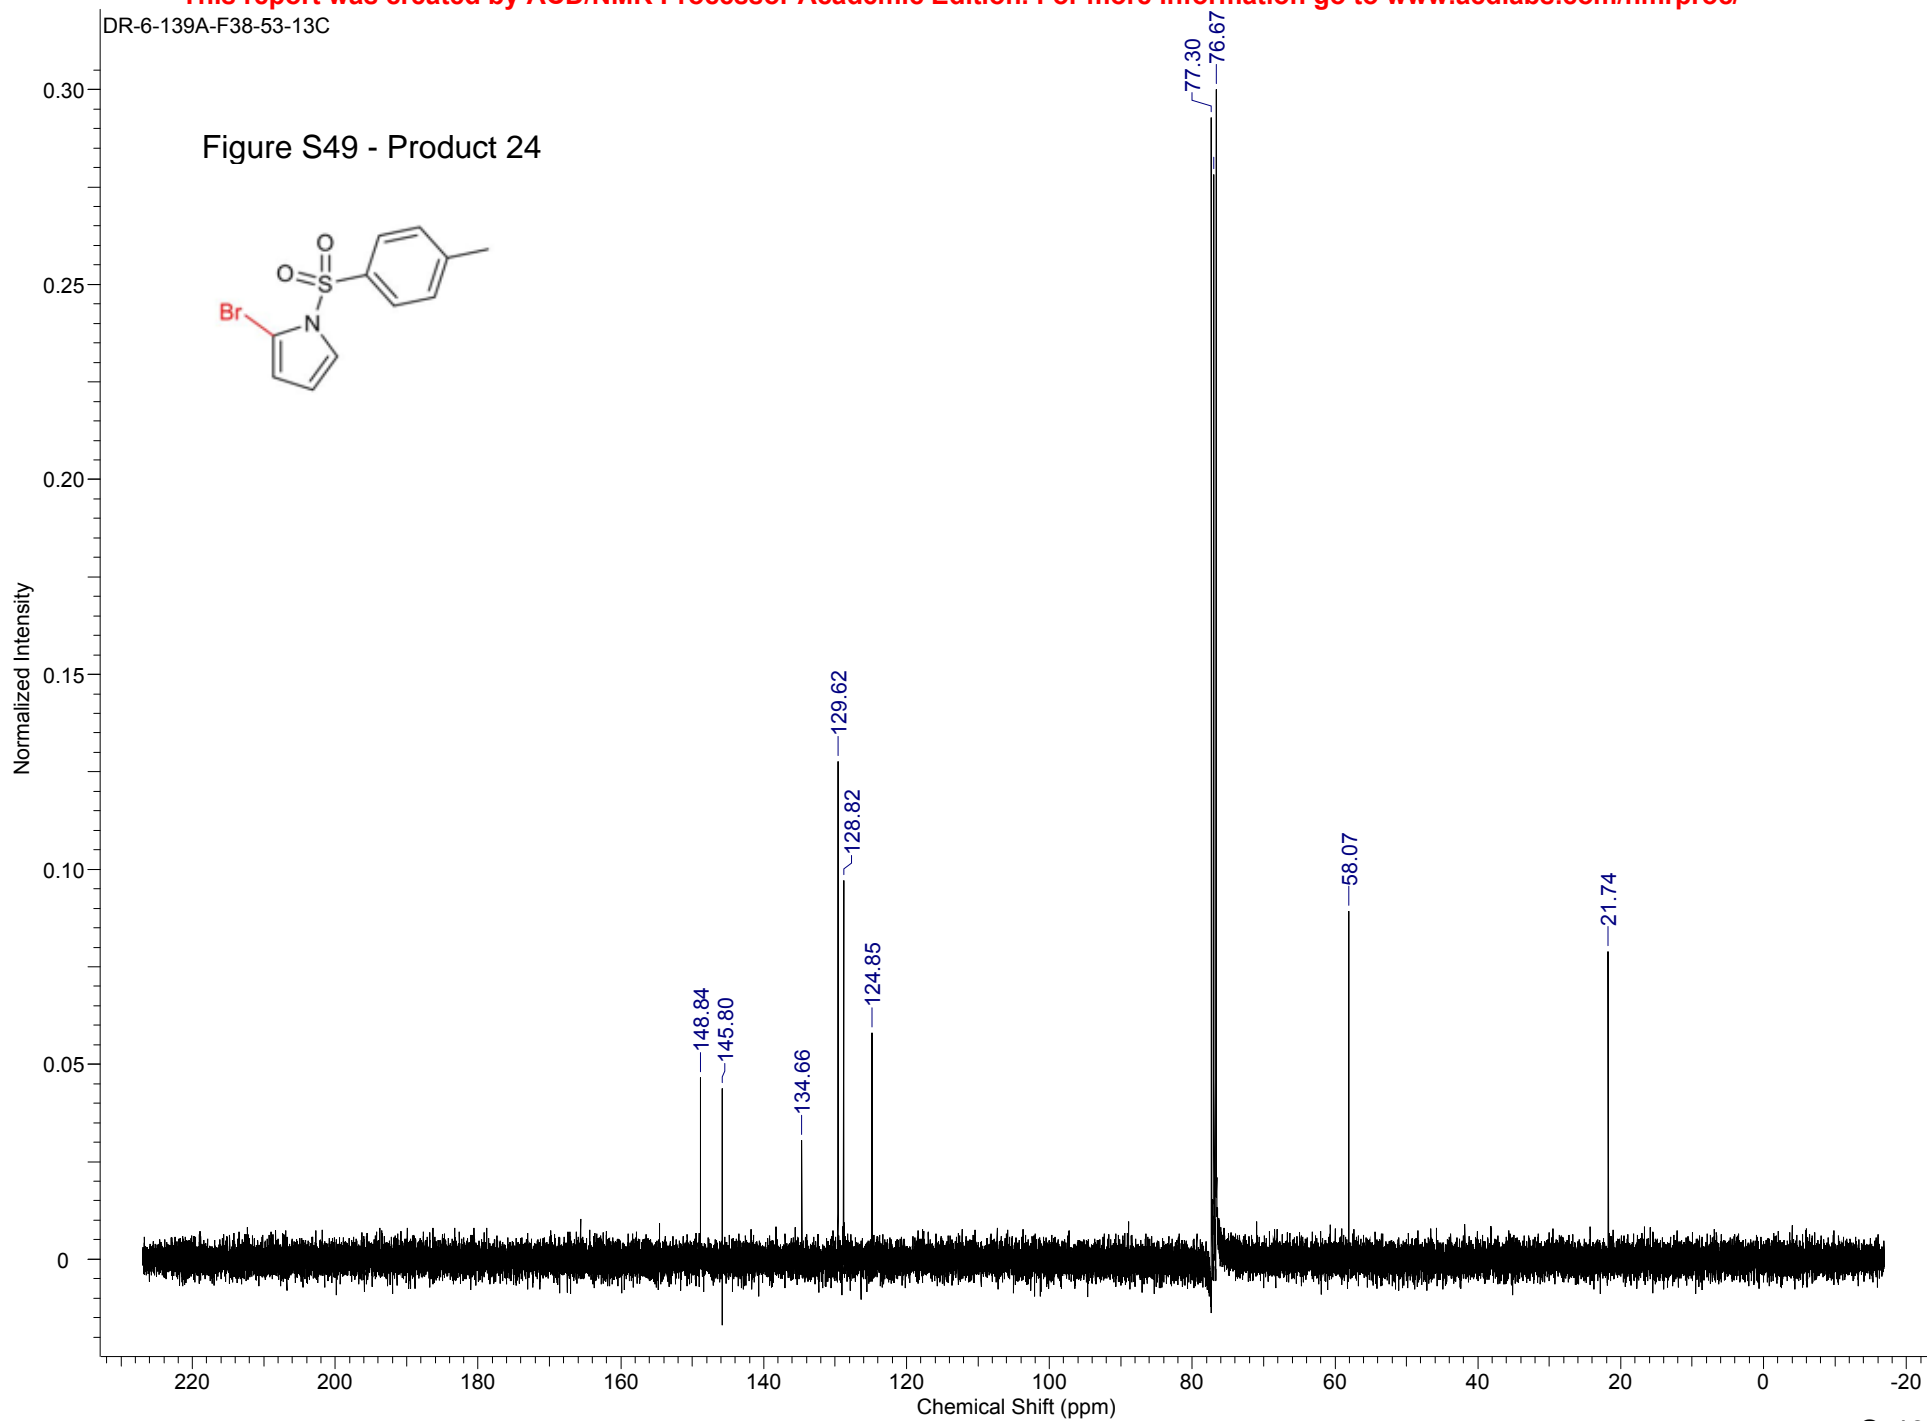

Supplement: ao8b02320_si_001.pdf [file ao8b02320_si_001.pdf]
